# Supplementary material for: Distinct signatures of calcium activity in brain mural cells
Source: eLife. 2021 Jul 6;10:e70591. doi: 10.7554/eLife.70591 (PMC8294852; doi:10.7554/eLife.70591)
Supplement: Figure 2—figure supplement 1—source data 1. [file elife-70591-fig2-figsupp1-data1.xlsx]

## Sheet: Figure 2 - supp1
	diameter (um)
	Capillary anest.	capillary awake	Ensheating anest.	ensheathing awake	SMC anest.	SMC awake
	3.9373	3.3	7.29183	11	17.9865	16
	4.17553	2.7	8.69155	10	18.759	22.13
	4.62516	3.3	10.1384	5.5	17.6437	17.23
	3.85554	3	8.06017	5.5	18.3102	17
	3.03874	4.5	10.4727	5.3	18.2331	14.98
	4.91111	4.3	10.9197	5.7	11.8945	17.01
	3.37724	3.3	10.4727	6	13.3326	10.67
	4.35892	3.1	7.11031	5.1	21.7715	9.98
	4.71246	5	7.04449	7.42	26.6808	9.34
	4.70322	4.4	7.67427	6.02	14.1654	13.91
	3.63521	3.9	6.82953	4.61	26.2147	14.31
	4.07903	3.7	7.51553	7.74	20.6914	5.62
	4.04333	3.7	7.14366	5.69	13.8111	6.81
	4.07578	4.9	10.3261	6.79	18.2047	20.61
	4.40321	5.5	7.11052	5.62	43.9879	17
	3.94559	4.4	7.04882	6.054	12.879	13
	3.78688	4.7	6.938	4.98	12.8343	16.14
	3.88353	4.4	7.24538	6.01	33.2026
	3.73381	4.3	7.7206	5	13.2544
	3.6116	4.8	6.10571	5.6	12.7414
	4.31386	3.7	6.23841		14.272
	3.74515	4.6	6.9017		14.9297
	3.49263	5.2	6.57434		24.44
	4.59599	4.3	6.1705		26.207
	3.55242	3.2	5.5029		7.557
	3.61225	5.1	9.1476		5.39
	3.39406	2.8	4.56615		9.504
	4.00484		5.863		13.072
	3.47046		5.7411		9.691
	3.0536		4.514		8.823
	4.80209		5.0789		16.65
	3.23284		5.541		18.52
	3.3801		7.3807		18.29
	4.12927		8.2147		20.61
	3.44998		6.2755		12.497
	3.13751
	4.82102
	2.15472
	4.70158
	3.50556
	4.91615
	4.33804
	4.40587
	5.05091
	5.03081
	3.73846
	5.50675
	5.52177
	3.99205
	3.59634
	4.44124
	4.83046
	5.58262
	4.92015
Number of values	54	27	35	20	35	17
25% Percentile	3.585	3.3	6.171	5.35	12.83	10.33
Median	4.024	4.3	7.11	5.695	16.65	14.98
75% Percentile	4.702	4.7	8.06	6.606	20.61	17.01
Mean	4.098	4.078	7.302	6.282	17.34	14.22
Std. Deviation	0.7043	0.7934	1.669	1.644	7.554	4.528
Std. Error of Mean	0.09585	0.1527	0.2821	0.3676	1.277	1.098
Lower 95% CI	3.906	3.764	6.729	5.512	14.75	11.89
Upper 95% CI	4.291	4.392	7.875	7.051	19.94	16.55
