# Supplementary material for: Distinct signatures of calcium activity in brain mural cells
Source: eLife. 2021 Jul 6;10:e70591. doi: 10.7554/eLife.70591 (PMC8294852; doi:10.7554/eLife.70591)
Supplement: Figure 2—source data 1. [file elife-70591-fig2-data1.xlsx]

## Sheet: 2H
					Unpaired t-test				Unpaired t-test
SMC_FisherZ	EP_FisherZ	CP_FisherZ
1.174	1.194	-0.089			P value	0.27			P value	<0.001
1.51	1.22	-0.063			P value summary	ns			P value summary	***
1.735	0.834	-0.007			Significantly different (P < 0.05)?	No			Significantly different (P < 0.05)?	Yes
1.747	0.855	0.1			One- or two-tailed P value?	Two-tailed			One- or two-tailed P value?	Two-tailed
1.48	1.31	0.018			t, df	t=1.139 df=24			t, df	t=14.21 df=20
0.977	1.1	0.025			Mean ± SEM of column E	1.199 ± 0.1026, n=13			Mean ± SEM of column F	1.064 ± 0.06046, n=13
0.714	1.1	0.06			Mean ± SEM of column F	1.064 ± 0.06046, n=13			Mean ± SEM of column G	-0.004778 ± 0.02094, n=9
1.501	1.558	-0.071			Difference between means	-0.1355 ± 0.119			Difference between means	-1.069 ± 0.07523
0.737	0.981	-0.016			95% confidence interval	-0.3812 to 0.1102			95% confidence interval	-1.226 to -0.9117
0.853	0.962				R squared (eta squared)	0.05124			R squared (eta squared)	0.9098
0.847	0.901				F, DFn, Dfd	2.877, 12, 12			F, DFn, Dfd	12.04, 12, 8
1.016	0.78				P value	0.08			P value	0.002
1.301	1.035				P value summary	ns			P value summary	**
					Significantly different (P < 0.05)?	No			Significantly different (P < 0.05)?	Yes
						SMC_FisherZ	EP_FisherZ			EP_FisherZ	CP_FisherZ
					Number of values	13	13		Number of values	13	9
					25% Percentile	0.85	0.878		25% Percentile	0.878	-0.067
					Median	1.174	1.035		Median	1.035	-0.007
					75% Percentile	1.506	1.207		75% Percentile	1.207	0.0425
					Mean	1.199	1.064		Mean	1.064	-0.004778
					Std. Deviation	0.3697	0.218		Std. Deviation	0.218	0.06283
					Std. Error of Mean	0.1026	0.06046		Std. Error of Mean	0.06046	0.02094
					Lower 95% CI	0.9759	0.9321		Lower 95% CI	0.9321	-0.05307
					Upper 95% CI	1.423	1.196		Upper 95% CI	1.196	0.04352

## Sheet: 2I-N
										SMC_anest._vs_awake
Celltype	Condition	Spot	animalname	ROIType	meanAmp	meanDur	freq			frequency
SMC	anesthetized	1	fN0591R	Soma	0.992749	2.38784	8			Models:
SMC	anesthetized	2	fN0591R	Soma	1.28676	2.54182	8			freq.null: freq ~ (1 | animalname) + (1 | Spot)
SMC	anesthetized	3	mN1246L	Soma	0.750647	2.50165	10			freq.model2: freq ~ Condition + (1 | animalname) + (1 | Spot)
SMC	anesthetized	4	mN1246L	Soma	1.30872	3.59161	7.33333			Df AIC BIC logLik deviance Chisq Chi Df Pr(>Chisq)
SMC	anesthetized	5	mN1246L	Soma	0.954757	2.36564	6.66667			freq.null 4 526.93 538.08 -259.47 518.93
SMC	anesthetized	6	mN1246L	Soma	0.874686	2.43105	6.66667			freq.model2 5 522.93 536.87 -256.47 512.93 5.9979 1 0.01432 *
SMC	anesthetized	7	f5R	Soma	0.415896	3.13275	8			---
SMC	anesthetized	8	f5R	Soma	0.797782	2.39484	8			Signif. codes: 0 ‘***’ 0.001 ‘**’ 0.01 ‘*’ 0.05 ‘.’ 0.1 ‘ ’ 1
SMC	anesthetized	9	f6LR	Soma	1.11704	3.26151	6.66667			Condition lsmean SE df lower.CL upper.CL
SMC	anesthetized	10	f5LL	Soma	0.530991	3.42147	6			awake 9.209249 0.6786120 12.57 7.738049 10.680449
SMC	anesthetized	11	f7LR	Soma	0.21357	2.90981	6.66667			isoflurane 6.936629 0.4596451 27.06 5.940139 7.933118
SMC	anesthetized	12	f7L	Soma	0.315538	2.98334	8.66667			Degrees-of-freedom method: satterthwaite
SMC	anesthetized	13	f7L	Soma	0.330838	2.98019	8			Confidence level used: 0.95
SMC	anesthetized	14	fSP7995R	Soma	0.214813	3.23454	6			contrast estimate SE df t.ratio p.value
SMC	anesthetized	15	fSP7995R	Soma	0.403374	2.73668	6			awake - isoflurane 2.27262 0.8196267 15.6 2.773 0.0138
SMC	anesthetized	16	fSP7995R	Soma	0.440905	2.95161	9.33333			amplitude
SMC	anesthetized	17	fSP7995R	Soma	0.792221	4.58026	5.33333			Models:
SMC	anesthetized	18	fSL7168LR	Soma	0.355354	2.56457	8.66667			meanAmp.null: meanAmp ~ (1 | animalname) + (1 | Spot)
SMC	anesthetized	19	fSL7168LR	Soma	0.321311	3.95167	5.33333			meanAmp.model2: meanAmp ~ Condition + (1 | animalname) + (1 | Spot)
SMC	anesthetized	20	fSL9054R	Soma	0.746273	3.466	6			Df AIC BIC logLik deviance Chisq Chi Df Pr(>Chisq)
SMC	anesthetized	21	mSL9056R	Soma	0.187343	5.37764	7.33333			meanAmp.null 4 38.723 49.873 -15.361 30.723
SMC	anesthetized	22	mSL9056R	Soma	0.221255	3.25416	7.33333			meanAmp.model2 5 36.717 50.654 -13.358 26.717 4.0058 1 0.04534 *
SMC	anesthetized	23	mSL9056R	Soma	0.162213	3.04655	7.33333			---
SMC	anesthetized	24	fSP8231L	Soma	0.292388	5.30029	4.66667			Signif. codes: 0 ‘***’ 0.001 ‘**’ 0.01 ‘*’ 0.05 ‘.’ 0.1 ‘ ’ 1
SMC	anesthetized	25	fSP8231L	Soma	0.285985	4.85962	6			Condition lsmean SE df lower.CL upper.CL
SMC	anesthetized	26	fSO1214LR	Soma	0.393201	6.71482	4			awake 0.3446114 0.09066612 3.86 0.08919991 0.6000228
SMC	anesthetized	27	fSP8231L	Soma	0.75315	2.01212	4.66667			isoflurane 0.6000369 0.06200400 9.70 0.42536823 0.7747056
SMC	anesthetized	28	fSP8231L	Soma	1.85249	3.91574	6.66667			Degrees-of-freedom method: satterthwaite
SMC	anesthetized	29	fSP8231L	Soma	0.816288	3.84152	6.66667			Confidence level used: 0.95
SMC	anesthetized	30	fSP8231L	Soma	0.854999	3.36027	6.66667			contrast estimate SE df t.ratio p.value
SMC	anesthetized	31	fSP8231L	Soma	0.574962	5.69804	3.33333			awake - isoflurane -0.2554256 0.1098401 4.97 -2.325 0.0679
SMC	anesthetized	32	mSL2105L	Soma	0.566988	3.80773	6.66667			duration
SMC	anesthetized	33	mSL2105L	Soma	0.370855	4.33333	6.66667			Models:
SMC	anesthetized	34	mSL2105L	Soma	0.419105	4.31438	6			meanDur.null: meanDur ~ (1 | animalname) + (1 | Spot)
SMC	anesthetized	35	mSL2105L	Soma	0.447563	3.60837	7.33333			meanDur.model2: meanDur ~ Condition + (1 | animalname) + (1 | Spot)
SMC	anesthetized	36	mSL2105L	Soma	1.01944	3.31213	6.66667			Df AIC BIC logLik deviance Chisq Chi Df Pr(>Chisq)
SMC	anesthetized	37	mSL2105L	Soma	0.656511	2.22017	6.66667			meanDur.null 4 342.51 353.66 -167.25 334.51
SMC	anesthetized	38	mSL2105L	Soma	0.553738	1.95981	8			meanDur.model2 5 343.83 357.77 -166.91 333.83 0.6771 1 0.4106
SMC	anesthetized	39	mSL2105L	Soma	0.37652	2.30477	6.66667			Condition lsmean SE df lower.CL upper.CL
SMC	anesthetized	40	mSL2105L	Soma	1.12448	3.48697	6			awake 3.080871 0.3592358 10.97 2.289940 3.871801
SMC	anesthetized	41	mSL2105L	Soma	0.68986	3.06634	6.66667			isoflurane 3.437376 0.2392428 23.89 2.910635 3.964117
SMC	anesthetized	42	mSL2105L	Soma	1.13645	4.22387	4			Degrees-of-freedom method: satterthwaite
SMC	anesthetized	43	mSL2105L	Soma	0.812481	5.0667	3.33333			Confidence level used: 0.95
SMC	anesthetized	44	mSL2105L	Soma	0.791559	4.31554	4			contrast estimate SE df t.ratio p.value
SMC	anesthetized	45	mSL2105L	Soma	0.619973	3.39398	6.66667			awake - isoflurane -0.3565055 0.4316103 13.58 -0.826 0.4231
SMC	anesthetized	46	mSL2105L	Soma	0.559759	1.98546	9.33333
SMC	anesthetized	47	mSL2105L	Soma	0.329147	3.09572	8.66667
SMC	anesthetized	48	mSL2105L	Soma	0.25984	3.26906	8.66667			awake_SMC_vs_EP
SMC	anesthetized	49	mSL2105L	Soma	0.383006	3.23294	8.66667			frequency
SMC	anesthetized	50	mSL2105L	Soma	0.672586	2.9508	8			Models:
SMC	anesthetized	51	mSL2105L	Soma	0.525064	3.66071	8.66667			freq.null: freq ~ (1 | animalname) + (1 | Spot)
SMC	anesthetized	52	mSL2105L	Soma	0.498824	3.20371	9.33333			freq.model2: freq ~ Condition + (1 | animalname) + (1 | Spot)
SMC	anesthetized	53	mSL2105L	Soma	0.566918	3.35481	8.66667			Df AIC BIC logLik deviance Chisq Chi Df Pr(>Chisq)
SMC	anesthetized	54	mSL2105L	Soma	0.535527	3.45246	6.66667			freq.null 4 449.28 459.23 -220.64 441.28
SMC	anesthetized	55	mSL2105L	Soma	0.482076	3.674	7.33333			freq.model2 5 449.27 461.71 -219.63 439.27 2.0073 1 0.1565
SMC	anesthetized	56	mSL2105L	Soma	0.403248	3.60033	7.33333			Condition lsmean SE df lower.CL upper.CL
SMC	anesthetized	57	mSL2105L	Soma	0.524491	3.07713	10			aSMC 9.264526 0.8411696 4.18 6.969098 11.55995
SMC	anesthetized	58	mSL2105L	Soma	0.547767	4.36288	5.33333			EPawake 8.482756 0.8941385 5.05 6.042783 10.92273
SMC	anesthetized	59	mSL2105L	Soma	0.391179	3.05045	8.66667			Degrees-of-freedom method: satterthwaite
SMC	anesthetized	60	mSL2105L	Soma	0.50277	2.68467	7.33333			Confidence level used: 0.95
SMC	anesthetized	61	mSL2105L	Soma	0.450485	3.82304	7.33333			contrast estimate SE df t.ratio p.value
SMC	anesthetized	62	mSL2105L	Soma	0.325337	3.1872	8			aSMC - EPawake 0.7817701 0.5474963 47 1.428 0.1599
SMC	anesthetized	63	mSL2105L	Soma	0.575119	2.91541	8.66667			amplitude
SMC	anesthetized	64	mSL2105L	Soma	0.487898	2.90099	9.33333			Models:
SMC	anesthetized	65	mSL2105L	Soma	0.617918	2.88133	8.66667			meanAmp.null: meanAmp ~ (1 | animalname) + (1 | Spot)
SMC	anesthetized	66	mSL2105L	Soma	0.540219	2.52138	8.66667			meanAmp.model2: meanAmp ~ Condition + (1 | animalname) + (1 | Spot)
SMC	anesthetized	67	mSL2105L	Soma	0.302568	2.83389	6			Df AIC BIC logLik deviance Chisq Chi Df Pr(>Chisq)
SMC	awake	1	P2	Soma	0.269904	2.95497	12			meanAmp.null 4 25.087 35.041 -8.5434 17.087
SMC	awake	2	P1	Soma	0.289514	1.36179	14			meanAmp.model2 5 22.695 35.138 -6.3474 12.695 4.392 1 0.03611 *
SMC	awake	3	P2	Soma	0.204536	2.93005	8.66667			---
SMC	awake	4	P2	Soma	0.165651	3.36177	7.33333			Signif. codes: 0 ‘***’ 0.001 ‘**’ 0.01 ‘*’ 0.05 ‘.’ 0.1 ‘ ’ 1
SMC	awake	5	P2	Soma	0.183422	3.00691	9.33333			Condition lsmean SE df lower.CL upper.CL
SMC	awake	6	P1	Soma	0.303655	2.07392	16.6667			aSMC 0.3658319 0.04043275 78.96 0.2853520 0.4463119
SMC	awake	7	P1	Soma	0.24397	2.1904	15.3333			EPawake 0.4424366 0.04336166 87.27 0.3561267 0.5287465
SMC	awake	8	P1	Soma	0.207834	1.73381	10			Degrees-of-freedom method: satterthwaite
SMC	awake	9	P1	Soma	0.351797	1.72955	14.6667			Confidence level used: 0.95
SMC	awake	10	P1	Soma	0.330735	2.38804	12.6667			contrast estimate SE df t.ratio p.value
SMC	awake	11	P1	Soma	0.292699	1.95585	14			aSMC - EPawake -0.07660466 0.03602284 32.95 -2.127 0.0410
SMC	awake	12	P1	Soma	0.230597	3.41778	9.33333			duration
SMC	awake	13	P1	Soma	0.232533	3.42708	8.66667			Models:
SMC	awake	14	P1	Soma	0.244577	2.81382	9.33333			meanDur.null: meanDur ~ (1 | animalname) + (1 | Spot)
SMC	awake	15	P1	Soma	0.226491	3.25235	8			meanDur.model2: meanDur ~ Condition + (1 | animalname) + (1 | Spot)
SMC	awake	16	P1	Soma	0.520436	1.34015	14.6667			Df AIC BIC logLik deviance Chisq Chi Df Pr(>Chisq)
SMC	awake	17	P2	Soma	0.264799	2.77376	10.6667			meanDur.null 4 294.87 304.82 -143.43 286.87
SMC	awake	18	P1	Soma	0.375904	2.18439	10.6667			meanDur.model2 5 295.30 307.75 -142.65 285.30 1.5634 1 0.2112
SMC	awake	19	P1	Soma	0.319816	2.22167	11.3333			Condition lsmean SE df lower.CL upper.CL
SMC	awake	20	P2	Soma	1.04196	1.87501	14.6667			aSMC 3.085895 0.3054979 4.58 2.27858 3.893211
SMC	awake	21	P1	Soma	0.353419	1.63086	14			EPawake 2.798362 0.3287993 5.71 1.92947 3.667255
SMC	awake	22	P2	Soma	0.201843	3.05852	9.33333			Degrees-of-freedom method: satterthwaite
SMC	awake	23	P2	Soma	0.192983	3.08241	10			Confidence level used: 0.95
SMC	awake	24	P1	Soma	0.821312	2.18682	10			contrast estimate SE df t.ratio p.value
SMC	awake	25	P1	Soma	0.255384	1.73648	10			aSMC - EPawake 0.2875333 0.227485 37.67 1.264 0.2140
SMC	awake	26	P2	Soma	0.437065	2.84342	8.66667
SMC	awake	27	P2	Soma	0.373306	3.2168	8
SMC	awake	28	P2	Soma	0.986549	2.38637	9.33333			anest._SMC_vs_EP
SMC	awake	29	P2	Soma	0.289438	2.35877	13.3333			frequency
SMC	awake	30	P2	Soma	0.183086	7.11001	4.66667			Models:
SMC	awake	31	P2	Soma	0.221795	2.19529	8.66667			freq.null: freq ~ (1 | animalname) + (1 | Spot)
SMC	awake	32	P3	Soma	0.213577	5.7562	6			freq.model2: freq ~ Condition + (1 | animalname) + (1 | Spot)
SMC	awake	33	P3	Soma	0.287133	6.97816	3.33333			Df AIC BIC logLik deviance Chisq Chi Df Pr(>Chisq)
SMC	awake	34	P3	Soma	0.377234	2.75346	8			freq.null 4 565.60 576.85 -278.8 557.60
SMC	awake	35	P3	Soma	0.331076	4.81841	6.66667			freq.model2 5 558.19 572.25 -274.1 548.19 9.4106 1 0.002157 **
SMC	awake	36	P3	Soma	0.306313	3.23384	8			---
SMC	awake	37	P3	Soma	1.54332	3.49532	6			Signif. codes: 0 ‘***’ 0.001 ‘**’ 0.01 ‘*’ 0.05 ‘.’ 0.1 ‘ ’ 1
SMC	awake	38	P3	Soma	0.227584	4.12071	4.66667			Condition lsmean SE df lower.CL upper.CL
SMC	awake	39	P3	Soma	0.20587	4.11696	6.66667			anesthetizedEP 8.347851 0.4527021 26.78 7.418632 9.277070
SMC	awake	40	P3	Soma	0.335167	3.10992	8			isoflurane_SMC 7.101553 0.4591346 24.96 6.159131 8.043976
SMC	awake	41	P3	Soma	0.340926	6.07905	8			Degrees-of-freedom method: satterthwaite
SMC	awake	42	P3	Soma	0.361984	4.25465	5.33333			Confidence level used: 0.95
SMC	awake	43	P4	Soma	0.378267	2.41158	5.33333			contrast estimate SE df t.ratio p.value
SMC	awake	44	P4	Soma	0.334771	2.13305	8			anesthetizedEP - isoflurane_SMC 1.246298 0.3900811 97.72 3.195 0.0019
SMC	awake	45	P3	Soma	0.363888	4.27821	6.66667			amplitude
SMC	awake	46	P3	Soma	0.196951	3.15915	7.33333			Models:
SMC	awake	47	P3	Soma	0.231216	2.80779	10			meanAmp.null: meanAmp ~ (1 | animalname) + (1 | Spot)
SMC	awake	48	P3	Soma	0.188806	5.03514	8			meanAmp.model2: meanAmp ~ Condition + (1 | animalname) + (1 | Spot)
SMC	awake	49	P3	Soma	0.246609	2.64673	9.33333			Df AIC BIC logLik deviance Chisq Chi Df Pr(>Chisq)
SMC	awake	50	P3	Soma	0.255645	3.08069	8			meanAmp.null 4 99.944 111.19 -45.972 91.944
SMC	awake	51	P3	Soma	0.216322	2.58997	9.33333			meanAmp.model2 5 101.752 115.81 -45.876 91.752 0.192 1 0.6613
SMC	awake	52	P3	Soma	0.294829	2.0405	11.3333			Condition lsmean SE df lower.CL upper.CL
SMC	awake	53	P3	Soma	0.398095	5.04785	6			anesthetizedEP 0.5801314 0.04693011 120.69 0.4872185 0.6730443
										isoflurane_SMC 0.6056853 0.04305640 123.00 0.5204416 0.6909290
ensheathing	anesthetized	1	young female	Process	1.31523	4.48465	16			Degrees-of-freedom method: satterthwaite
ensheathing	anesthetized	1	young female	Soma	1.01409	4.1503	6			Confidence level used: 0.95
ensheathing	anesthetized	2	female young	Process	0.631454	2.59723	18			contrast estimate SE df t.ratio p.value
ensheathing	anesthetized	2	female young	Soma	0.663288	2.42813	8.66667			anesthetizedEP - isoflurane_SMC -0.02555387 0.05482872 51.81 -0.466 0.6431
ensheathing	anesthetized	3	fN0591R	Process	2.28018	2.33464	28.6667			duration
ensheathing	anesthetized	3	fN0591R	Soma	0.452143	1.69668	12.6667			Models:
ensheathing	anesthetized	4	fN0591R	Process	2.22294	2.56922	22			meanDur.null: meanDur ~ (1 | animalname) + (1 | Spot)
ensheathing	anesthetized	4	fN0591R	Soma	0.450995	1.53944	15.3333			meanDur.model2: meanDur ~ Condition + (1 | animalname) + (1 | Spot)
ensheathing	anesthetized	5	mN1246L	Process	0.790451	3.60236	20.6667			Df AIC BIC logLik deviance Chisq Chi Df Pr(>Chisq)
ensheathing	anesthetized	5	mN1246L	Soma	0.502509	2.34265	8			meanDur.null 4 319.31 330.56 -155.66 311.31
ensheathing	anesthetized	6	mN1246L	Process	1.18889	3.43033	46			meanDur.model2 5 317.53 331.59 -153.76 307.53 3.7829 1 0.05178 .
ensheathing	anesthetized	6	mN1246L	Soma	0.720489	3.58324	13.3333			---
ensheathing	anesthetized	7	mN1246L	Process	2.17456	2.80122	76.6667			Signif. codes: 0 ‘***’ 0.001 ‘**’ 0.01 ‘*’ 0.05 ‘.’ 0.1 ‘ ’ 1
ensheathing	anesthetized	7	mN1246L	Soma	1.08579	2.81434	17.3333			Condition lsmean SE df lower.CL upper.CL
ensheathing	anesthetized	8	mN1246L	Process	0.974414	2.87853	40.6667			anesthetizedEP 3.368764 0.10543668 113.81 3.159891 3.577637
ensheathing	anesthetized	8	mN1246L	Soma	0.873891	2.23426	13.3333			isoflurane_SMC 3.198962 0.09843015 118.96 3.003969 3.393955
ensheathing	anesthetized	9	mSO2090LR	Process	1.68316	2.18385	29.3333			Degrees-of-freedom method: satterthwaite
ensheathing	anesthetized	9	mSO2090LR	Soma	0.357178	3.39498	6			Confidence level used: 0.95
ensheathing	anesthetized	10	mN1246L	Process	1.12942	2.50654	17.3333			contrast estimate SE df t.ratio p.value
ensheathing	anesthetized	10	mN1246L	Soma	0.312588	3.88854	4			anesthetizedEP - isoflurane_SMC 0.1698027 0.1063069 33.67 1.597 0.1195
ensheathing	anesthetized	11	fSO4235LL	Process	0.522969	3.25802	24.6667
ensheathing	anesthetized	11	fSO4235LL	Soma	0.261142	2.70541	8.66667			anest._CP_vs_awakeCP
ensheathing	anesthetized	12	fSO4235LL	Process	0.733384	4.98328	14.6667			frequency
ensheathing	anesthetized	12	fSO4235LL	Soma	0.389525	2.27129	12.6667			Soma
ensheathing	anesthetized	13	f5R	Process	0.911694	2.55971	12			Models:
ensheathing	anesthetized	13	f5R	Soma	0.699058	2.26312	9.33333			freq.null: freq ~ (1 | animalname) + (1 | Spot)
ensheathing	anesthetized	14	f5R	Process	0.938568	2.87053	14.6667			freq.model2: freq ~ Condition + (1 | animalname) + (1 | Spot)
ensheathing	anesthetized	14	f5R	Soma	0.439063	2.35198	10.6667			Df AIC BIC logLik deviance Chisq Chi Df Pr(>Chisq)
ensheathing	anesthetized	15	f6LR	Process	1.7182	2.28894	12			freq.null 4 881.63 894.59 -436.81 873.63
ensheathing	anesthetized	15	f6LR	Soma	0.672271	2.66362	8			freq.model2 5 882.79 899.00 -436.39 872.79 0.8385 1 0.3598
ensheathing	anesthetized	16	f5LL	Process	3.02619	2.83458	17.3333			Condition lsmean SE df lower.CL upper.CL
ensheathing	anesthetized	16	f5LL	Soma	0.621788	2.7126	4.66667			anesthetized 8.299384 0.3179560 37.52 7.655445 8.943323
ensheathing	anesthetized	17	f7LR	Process	0.32378	5.40026	14			awake 7.629366 0.5601291 8.81 6.494967 8.763765
ensheathing	anesthetized	17	f7LR	Soma	0.232859	3.14937	8			Degrees-of-freedom method: satterthwaite
ensheathing	anesthetized	18	mLR8	Process	0.859046	4.43321	7.33333			Confidence level used: 0.95
ensheathing	anesthetized	18	mLR8	Soma	0.599612	3.45085	7.33333			contrast estimate SE df t.ratio p.value
ensheathing	anesthetized	19	mLR8	Process	0.750123	4.01073	11.3333			anesthetized - awake 0.6700178 0.6440812 11.6 1.04 0.3194
ensheathing	anesthetized	19	mLR8	Soma	0.419998	3.9544	6.66667			Process
ensheathing	anesthetized	20	f9LR	Process	0.791638	3.51798	22			Models:
ensheathing	anesthetized	20	f9LR	Soma	0.401665	2.72685	6			freq.null: freq ~ (1 | animalname) + (1 | Spot)
ensheathing	anesthetized	21	f7L	Process	1.69333	2.58642	9.33333			freq.model2: freq ~ Condition + (1 | animalname) + (1 | Spot)
ensheathing	anesthetized	21	f7L	Soma	0.250861	2.67968	8.66667			Df AIC BIC logLik deviance Chisq Chi Df Pr(>Chisq)
ensheathing	anesthetized	22	f7L	Process	0.966529	3.29796	14			freq.null 4 1612.0 1625.0 -801.99 1604.0
ensheathing	anesthetized	22	f7L	Soma	0.514394	2.88226	8			freq.model2 5 1610.7 1626.9 -800.36 1600.7 3.2725 1 0.07045 .
ensheathing	anesthetized	23	fSP7995R	Process	0.511148	4.35827	14.6667			---
ensheathing	anesthetized	23	fSP7995R	Soma	0.284048	3.77503	6			Signif. codes: 0 ‘***’ 0.001 ‘**’ 0.01 ‘*’ 0.05 ‘.’ 0.1 ‘ ’ 1
ensheathing	anesthetized	24	fSP7995R	Process	1.58215	4.28937	28.6667			Condition lsmean SE df lower.CL upper.CL
ensheathing	anesthetized	24	fSP7995R	Soma	0.513569	3.77533	4.66667			anesthetized 45.21982 2.130093 27.55 40.85327 49.58636
ensheathing	anesthetized	25	fSP7995R	Process	1.10276	4.56399	45.3333			awake 37.43124 3.439965 4.91 30.37955 44.48294
ensheathing	anesthetized	25	fSP7995R	Soma	0.887306	4.25706	5.33333			Degrees-of-freedom method: satterthwaite
ensheathing	anesthetized	26	fSP7995R	Process	0.875077	3.21173	11.3333			Confidence level used: 0.95
ensheathing	anesthetized	26	fSP7995R	Soma	0.589085	2.52437	9.33333			contrast estimate SE df t.ratio p.value
ensheathing	anesthetized	27	fSL7168LR	Process	1.08856	2.88424	19.3333			anesthetized - awake 7.788571 4.046067 7.01 1.925 0.0955
ensheathing	anesthetized	27	fSL7168LR	Soma	0.398909	2.4133	8.66667			amplitude
ensheathing	anesthetized	28	fSL7168LR	Process	0.652449	2.91692	30.6667			Soma
ensheathing	anesthetized	28	fSL7168LR	Soma	0.47468	2.17175	8			Models:
ensheathing	anesthetized	29	fSL7168LR	Process	0.981192	3.56122	12.6667			meanAmp.null: meanAmp ~ (1 | animalname) + (1 | Spot)
ensheathing	anesthetized	29	fSL7168LR	Soma	0.277639	2.34017	13.3333			meanAmp.model2: meanAmp ~ Condition+ (1 | animalname) + (1 | Spot)
ensheathing	anesthetized	30	mSL2105L	Process	1.34635	3.79827	18			Df AIC BIC logLik deviance Chisq Chi Df Pr(>Chisq)
ensheathing	anesthetized	30	mSL2105L	Soma	2.04562	3.45146	7.33333			meanAmp.null 4 494.68 507.65 -243.34 486.68
ensheathing	anesthetized	31	mSL2105L	Process	0.946064	3.49548	19.3333			meanAmp.model2 5 487.05 503.26 -238.53 477.05 9.6294 1 0.001915 **
ensheathing	anesthetized	31	mSL2105L	Soma	0.588528	4.81178	5.33333			---
ensheathing	anesthetized	32	mSL2105L	Process	1.76249	4.82402	28			Signif. codes: 0 ‘***’ 0.001 ‘**’ 0.01 ‘*’ 0.05 ‘.’ 0.1 ‘ ’ 1
ensheathing	anesthetized	32	mSL2105L	Soma	0.46672	5.60287	5.33333			Condition lsmean SE df lower.CL upper.CL
ensheathing	anesthetized	33	mSL2105L	Process	2.5183	4.72189	28			anesthetized 1.148557 0.09460536 181.37 0.9618885 1.3352258
ensheathing	anesthetized	33	mSL2105L	Soma	2.11912	4.89564	5.33333			awake 0.286853 0.09159058 181.84 0.1061329 0.4675732
ensheathing	anesthetized	34	mSL2105L	Process	1.82689	3.46006	16			Degrees-of-freedom method: satterthwaite
ensheathing	anesthetized	34	mSL2105L	Soma	0.255489	3.01104	7.33333			Confidence level used: 0.95
ensheathing	anesthetized	35	mSL2105L	Process	4.61856	2.26827	21.3333			contrast estimate SE df t.ratio p.value
ensheathing	anesthetized	35	mSL2105L	Soma	0.451847	1.98207	8			anesthetized - awake 0.8617041 0.1316777 181.6 6.544 <.0001
ensheathing	anesthetized	36	mSL2105L	Process	0.85215	1.62319	10			Process
ensheathing	anesthetized	36	mSL2105L	Soma	0.325123	2.16222	9.33333			Models:
ensheathing	anesthetized	37	mSL2105L	Process	1.11301	4.58185	12.6667			meanAmp.null: meanAmp ~ (1 | animalname) + (1 | Spot)
ensheathing	anesthetized	37	mSL2105L	Soma	0.439192	2.39839	9.33333			meanAmp.model2: meanAmp ~ Condition + (1 | animalname) + (1 | Spot)
ensheathing	anesthetized	38	mSL2105L	Process	1.07699	3.37441	25.3333			Df AIC BIC logLik deviance Chisq Chi Df Pr(>Chisq)
ensheathing	anesthetized	38	mSL2105L	Soma	0.326402	3.01529	8.66667			meanAmp.null 4 154.90 167.87 -73.449 146.90
ensheathing	anesthetized	39	mSL2105L	Process	0.615279	3.63227	34			meanAmp.model2 5 136.05 152.26 -63.024 126.05 20.852 1 4.963e-06 ***
ensheathing	anesthetized	39	mSL2105L	Soma	0.34181	4.23136	6.66667			---
ensheathing	anesthetized	40	mSL2105L	Process	0.778275	3.30124	18.6667			Signif. codes: 0 ‘***’ 0.001 ‘**’ 0.01 ‘*’ 0.05 ‘.’ 0.1 ‘ ’ 1
ensheathing	anesthetized	40	mSL2105L	Soma	0.799263	2.90419	8.66667			Condition lsmean SE df lower.CL upper.CL
ensheathing	anesthetized	41	mSL2105L	Process	0.779167	2.54128	10.6667			anesthetized 1.2754749 0.03631733 180.10 1.2038127 1.3471372
ensheathing	anesthetized	41	mSL2105L	Soma	0.617504	3.85066	6			awake 0.6628306 0.03524166 182.65 0.5932909 0.7323703
ensheathing	anesthetized	42	mSL2105L	Process	1.24516	3.57933	23.3333			Degrees-of-freedom method: satterthwaite
ensheathing	anesthetized	42	mSL2105L	Soma	0.286729	2.85038	9.33333			Confidence level used: 0.95
ensheathing	anesthetized	43	mSL2105L	Process	1.04526	4.73319	26.6667			contrast estimate SE df t.ratio p.value
ensheathing	anesthetized	43	mSL2105L	Soma	0.51905	4.37057	6			anesthetized - awake 0.6126443 0.05060557 181.39 12.106 <.0001
ensheathing	anesthetized	44	mSL2105L	Process	1.39291	4.0002	17.3333			duration
ensheathing	anesthetized	44	mSL2105L	Soma	2.16522	3.67559	4.66667			Soma
ensheathing	anesthetized	45	mSL2105L	Process	0.790441	4.27966	26			Models:
ensheathing	anesthetized	45	mSL2105L	Soma	0.279963	3.02558	9.33333			meanDur.null: meanDur ~ (1 | animalname) + (1 | Spot)
ensheathing	anesthetized	46	mSL2105L	Process	2.43539	3.39707	25.3333			meanDur.model2: meanDur ~ Condition + (1 | animalname) + (1 | Spot)
ensheathing	anesthetized	46	mSL2105L	Soma	0.616977	2.63942	6			Df AIC BIC logLik deviance Chisq Chi Df Pr(>Chisq)
ensheathing	anesthetized	47	mSL2105L	Process	1.48816	3.35465	30			meanDur.null 4 351.57 364.54 -171.79 343.57
ensheathing	anesthetized	47	mSL2105L	Soma	0.388352	2.70861	8.66667			meanDur.model2 5 353.57 369.78 -171.79 343.57 2e-04 1 0.9896
ensheathing	anesthetized	48	mSL2105L	Process	1.65911	2.60789	35.3333			Condition lsmean SE df lower.CL upper.CL
ensheathing	anesthetized	48	mSL2105L	Soma	0.852078	2.23528	10			anesthetized 2.436107 0.06226770 189 2.313278 2.558936
ensheathing	anesthetized	49	mSL2105L	Process	1.03197	2.78821	6.66667			awake 2.437241 0.06128704 189 2.316347 2.558136
ensheathing	anesthetized	49	mSL2105L	Soma	0.518159	2.486	10.6667			Degrees-of-freedom method: satterthwaite
ensheathing	anesthetized	50	mSL2105L	Process	1.10369	2.40349	23.3333			Confidence level used: 0.95
ensheathing	anesthetized	50	mSL2105L	Soma	0.474426	2.35185	8.66667			contrast estimate SE df t.ratio p.value
ensheathing	anesthetized	51	mSL2105L	Process	0.814277	3.19449	10.6667			anesthetized - awake -0.001134069 0.08736915 189 -0.013 0.9897
ensheathing	anesthetized	51	mSL2105L	Soma	0.530809	2.8625	8			Process
ensheathing	anesthetized	52	mSL2105L	Process	0.683929	2.76237	14.6667			Models:
ensheathing	anesthetized	52	mSL2105L	Soma	0.617611	3.32809	5.33333			meanDur.null: meanDur ~ (1 | animalname) + (1 | Spot)
ensheathing	anesthetized	53	mSL2105L	Process	1.21594	1.95225	10.6667			meanDur.model2: meanDur ~ Condition + (1 | animalname) + (1 | Spot)
ensheathing	anesthetized	53	mSL2105L	Soma	0.441837	2.66543	8			Df AIC BIC logLik deviance Chisq Chi Df Pr(>Chisq)
ensheathing	awake	1	P1	Process	0.290569	2.72193	12			meanDur.null 4 305.71 318.68 -148.86 297.71
ensheathing	awake	1	P1	Soma	0.335989	1.79143	12			meanDur.model2 5 305.54 321.75 -147.77 295.54 2.174 1 0.1404
ensheathing	awake	2	P1	Process	0.312497	3.60111	22			Condition lsmean SE df lower.CL upper.CL
ensheathing	awake	2	P1	Soma	0.259148	1.6956	7.33333			anesthetized 2.437751 0.05503718 178.51 2.329144 2.546358
ensheathing	awake	3	P1	Process	0.299665	3.30931	21.3333			awake 2.622715 0.05405250 187.08 2.516051 2.729379
ensheathing	awake	3	P1	Soma	0.23635	2.00411	10.6667			Degrees-of-freedom method: satterthwaite
ensheathing	awake	4	P1	Process	0.783506	3.9424	26.6667			Confidence level used: 0.95
ensheathing	awake	4	P1	Soma	0.228855	2.60296	8.66667			contrast estimate SE df t.ratio p.value
ensheathing	awake	5	P1	Process	0.953282	2.03484	7.33333			anesthetized - awake -0.1849634 0.0771412 183.5 -2.398 0.0175
ensheathing	awake	5	P1	Soma	0.17707	4.16172	5.33333
ensheathing	awake	6	P1	Process	0.787931	3.74951	18.6667
ensheathing	awake	6	P1	Soma	0.276682	3.4277	7.33333			awake_CP_vs_EP
ensheathing	awake	7	P1	Process	1.70762	4.8865	14			frequency
ensheathing	awake	7	P1	Soma	1.57017	2.58463	10.6667			Soma
ensheathing	awake	8	P1	Process	0.678597	1.92603	20.6667			Models:
ensheathing	awake	8	P1	Soma	0.426731	1.35365	9.33333			freq.null: freq ~ (1 | animalname) + (1 | Spot)
ensheathing	awake	9	P1	Process	0.655327	1.93728	16.6667			freq.model2: freq ~ Condition + (1 | animalname) + (1 | Spot)
ensheathing	awake	9	P1	Soma	0.435067	1.31669	17.3333			Df AIC BIC logLik deviance Chisq Chi Df Pr(>Chisq)
ensheathing	awake	10	P1	Process	1.64758	1.63596	9.33333			freq.null 4 657.77 669.3 -324.89 649.77
ensheathing	awake	10	P1	Soma	0.363093	1.75955	12.6667			freq.model2 5 655.78 670.2 -322.89 645.78 3.9862 1 0.04588 *
ensheathing	awake	11	P1	Process	2.494	2.78838	21.3333			---
ensheathing	awake	11	P1	Soma	0.441577	1.83293	8			Signif. codes: 0 ‘***’ 0.001 ‘**’ 0.01 ‘*’ 0.05 ‘.’ 0.1 ‘ ’ 1
ensheathing	awake	12	P2	Process	0.425277	3.06497	25.3333			Condition lsmean SE df lower.CL upper.CL
ensheathing	awake	12	P2	Soma	0.235557	3.28566	9.33333			awake 7.698865 0.7148632 3.45 5.582558 9.815172
ensheathing	awake	13	P2	Process	0.293139	3.319	21.3333			awake_EP 8.807245 0.7824419 5.07 6.490876 11.123614
ensheathing	awake	13	P2	Soma	0.358945	2.5432	12.6667			Degrees-of-freedom method: satterthwaite
ensheathing	awake	14	P2	Process	0.565838	2.08789	25.3333			Confidence level used: 0.95
ensheathing	awake	14	P2	Soma	0.677737	3.36569	7.33333			contrast estimate SE df t.ratio p.value
ensheathing	awake	15	P2	Process	0.607844	3.69431	25.3333			awake - awake_EP -1.10838 0.5431906 129.98 -2.04 0.0433
ensheathing	awake	15	P2	Soma	0.816656	3.6468	8			Process
ensheathing	awake	16	P3	Process	1.70989	2.79706	29.3333			Models:
ensheathing	awake	16	P3	Soma	0.158659	2.74525	8			freq.null: freq ~ (1 | animalname) + (1 | Spot)
ensheathing	awake	17	P3	Process	1.18327	1.85818	23.3333			freq.model2: freq ~ Condition + (1 | animalname) + (1 | Spot)
ensheathing	awake	17	P3	Soma	1.16674	1.93185	4			Df AIC BIC logLik deviance Chisq Chi Df Pr(>Chisq)
ensheathing	awake	18	P3	Process	1.34598	2.08761	27.3333			freq.null 4 1101.1 1112.6 -546.54 1093.1
ensheathing	awake	18	P3	Soma	1.04259	1.73242	10			freq.model2 5 1057.7 1072.1 -523.83 1047.7 45.411 1 1.597e-11 ***
ensheathing	awake	19	P3	Process	1.16849	2.90749	35.3333			---
ensheathing	awake	19	P3	Soma	0.846242	1.80971	12			Signif. codes: 0 ‘***’ 0.001 ‘**’ 0.01 ‘*’ 0.05 ‘.’ 0.1 ‘ ’ 1
ensheathing	awake	20	P3	Process	1.2865	2.78584	2.66667			Condition lsmean SE df lower.CL upper.CL
ensheathing	awake	20	P3	Soma	0.184252	2.49496	8			awake 38.11370 2.183779 3.48 31.67904 44.54836
ensheathing	awake	21	P3	Process	0.616172	3.25889	16.6667			awake_EP 19.46912 2.665472 8.66 11.61511 27.32312
ensheathing	awake	21	P3	Soma	1.94102	3.08014	5.33333			Degrees-of-freedom method: satterthwaite
ensheathing	awake	22	P3	Process	0.351537	2.77822	14			Confidence level used: 0.95
ensheathing	awake	22	P3	Soma	0.286108	2.51529	12.6667			contrast estimate SE df t.ratio p.value
ensheathing	awake	23	P3	Process	1.12444	3.36625	17.3333			awake - awake_EP 18.64458 2.501531 130.81 7.453 <.0001
ensheathing	awake	23	P3	Soma	0.31453	2.94977	10			amplitude
ensheathing	awake	24	P3	Process	1.3451	3.15238	14.6667			Soma
ensheathing	awake	24	P3	Soma	0.209419	2.32393	11.3333			Models:
ensheathing	awake	25	P3	Process	0.595134	2.34373	19.3333			meanAmp.null: meanAmp ~ (1 | animalname) + (1 | Spot)
ensheathing	awake	25	P3	Soma	0.285911	1.60537	14.6667			meanAmp.model2: meanAmp ~ Condition + (1 | animalname) + (1 | Spot)
ensheathing	awake	26	P3	Process	1.01058	3.10814	24.6667			Df AIC BIC logLik deviance Chisq Chi Df Pr(>Chisq)
ensheathing	awake	26	P3	Soma	0.339911	5.25242	4.66667			meanAmp.null 4 3.9557 15.4869 2.0221 -4.0443
ensheathing	awake	27	P3	Process	0.523203	2.18653	18.6667			meanAmp.model2 5 -10.9657 3.4483 10.4829 -20.9657 16.921 1 3.896e-05 ***
ensheathing	awake	27	P3	Soma	0.300521	3.04715	8			---
ensheathing	awake	28	P3	Process	0.654108	2.50573	9.33333			Signif. codes: 0 ‘***’ 0.001 ‘**’ 0.01 ‘*’ 0.05 ‘.’ 0.1 ‘ ’ 1
ensheathing	awake	28	P3	Soma	0.297304	2.90775	6			Condition lsmean SE df lower.CL upper.CL
ensheathing	awake	29	P3	Process	0.710166	3.0951	19.3333			awake 0.2884700 0.02298586 131.04 0.2429986 0.3339414
ensheathing	awake	29	P3	Soma	0.366371	3.75721	6			awake_EP 0.4739961 0.03711128 129.32 0.4005813 0.5474109
ensheathing	awake	30	P3	Process	0.976143	2.65881	33.3333			Degrees-of-freedom method: satterthwaite
ensheathing	awake	30	P3	Soma	0.611303	2.6172	5.33333			Confidence level used: 0.95
ensheathing	awake	31	P3	Process	0.602417	3.94057	36.6667			contrast estimate SE df t.ratio p.value
ensheathing	awake	31	P3	Soma	0.364074	3.23807	6.66667			awake - awake_EP -0.1855261 0.04325791 122.57 -4.289 <.0001
ensheathing	awake	32	P3	Process	0.262184	3.42961	16			Process
ensheathing	awake	32	P3	Soma	0.212525	2.1299	5.33333			Models:
										meanAmp.null: meanAmp ~ (1 | animalname) + (1 | Spot)
capillary	anesthetized	1	younger male	Process	1.18511	2.48015	38.6667			meanAmp.model2: meanAmp ~ Condition + (1 | animalname) + (1 | Spot)
capillary	anesthetized	1	younger male	Soma	0.995871	3.58874	6			Df AIC BIC logLik deviance Chisq Chi Df Pr(>Chisq)
capillary	anesthetized	2	young_female	Process	1.5421	1.86907	54			meanAmp.null 4 111.57 123.10 -51.786 103.571
capillary	anesthetized	2	young_female	Soma	2.5249	2.45359	8.66667			meanAmp.model2 5 104.41 118.82 -47.203 94.406 9.1655 1 0.002466 **
capillary	anesthetized	3	younger male	Process	1.02684	2.66304	62.6667			---
capillary	anesthetized	3	younger male	Soma	2.01281	2.73823	6			Signif. codes: 0 ‘***’ 0.001 ‘**’ 0.01 ‘*’ 0.05 ‘.’ 0.1 ‘ ’ 1
capillary	anesthetized	4	female young	Process	0.957866	2.73765	14.6667			Condition lsmean SE df lower.CL upper.CL
capillary	anesthetized	4	female young	Soma	0.458126	2.66475	6.66667			awake 0.6592601 0.03531263 132 0.5894082 0.7291119
capillary	anesthetized	5	female young	Process	0.645943	2.86131	30.6667			awake_EP 0.8675780 0.05766528 132 0.7535104 0.9816456
capillary	anesthetized	5	female young	Soma	0.486518	2.13691	6.66667			Degrees-of-freedom method: satterthwaite
capillary	anesthetized	6	female young	Process	1.14583	2.18807	76			Confidence level used: 0.95
capillary	anesthetized	6	female young	Soma	0.498655	2.08344	7.33333			contrast estimate SE df t.ratio p.value
capillary	anesthetized	7	female young	Process	0.9422	1.85136	40.6667			awake - awake_EP -0.2083179 0.06761853 132 -3.081 0.0025
capillary	anesthetized	7	female young	Soma	3.48927	1.56163	14			duration
capillary	anesthetized	8	female young	Process	1.54167	1.87218	38.6667			Soma
capillary	anesthetized	8	female young	Soma	0.760255	2.53435	8.66667			Models:
capillary	anesthetized	9	female young	Process	0.845555	2.51935	24.6667			meanDur.null: meanDur ~ (1 | animalname) + (1 | Spot)
capillary	anesthetized	9	female young	Soma	1.11033	2.61382	10			meanDur.model2: meanDur ~ Condition + (1 | animalname) + (1 | Spot)
capillary	anesthetized	10	female young	Process	1.13209	2.34609	36.6667			Df AIC BIC logLik deviance Chisq Chi Df Pr(>Chisq)
capillary	anesthetized	10	female young	Soma	0.467761	1.77278	10			meanDur.null 4 348.36 359.89 -170.18 340.36
capillary	anesthetized	11	female young	Process	1.2218	2.36254	28			meanDur.model2 5 343.28 357.70 -166.64 333.28 7.0717 1 0.007831 **
capillary	anesthetized	11	female young	Soma	0.656634	1.91417	9.33333			---
capillary	anesthetized	12	female young	Process	1.07553	2.37604	38			Signif. codes: 0 ‘***’ 0.001 ‘**’ 0.01 ‘*’ 0.05 ‘.’ 0.1 ‘ ’ 1
capillary	anesthetized	12	female young	Soma	0.849727	2.17156	10			Condition lsmean SE df lower.CL upper.CL
capillary	anesthetized	13	female young	Process	1.35151	2.28632	66.6667			awake 2.440479 0.08789681 131.23 2.266601 2.614357
capillary	anesthetized	13	female young	Soma	1.23069	1.6903	12			awake_EP 2.894085 0.14211314 130.73 2.612956 3.175214
capillary	anesthetized	14	female young	Process	1.86754	2.23506	56			Degrees-of-freedom method: satterthwaite
capillary	anesthetized	14	female young	Soma	1.67408	2.25119	7.33333			Confidence level used: 0.95
capillary	anesthetized	15	female young	Process	0.883012	2.8002	31.3333			contrast estimate SE df t.ratio p.value
capillary	anesthetized	15	female young	Soma	0.895653	1.81876	10			awake - awake_EP -0.4536061 0.1657862 127.02 -2.736 0.0071
capillary	anesthetized	16	female young	Process	1.22132	2.42687	42			Process
capillary	anesthetized	16	female young	Soma	0.449519	3.65589	4.66667			Models:
capillary	anesthetized	17	female young	Process	1.42531	2.02046	72			meanDur.null: meanDur ~ (1 | animalname) + (1 | Spot)
capillary	anesthetized	17	female young	Soma	0.593864	2.39075	10.6667			meanDur.model2: meanDur ~ Condition + (1 | animalname) + (1 | Spot)
capillary	anesthetized	18	mN1246L	Process	1.33073	2.30418	61.3333			Df AIC BIC logLik deviance Chisq Chi Df Pr(>Chisq)
capillary	anesthetized	18	mN1246L	Soma	0.38797	1.8449	10			meanDur.null 4 303.77 315.30 -147.88 295.77
capillary	anesthetized	19	mN1246L	Process	1.63017	3.39308	44			meanDur.model2 5 294.02 308.44 -142.01 284.02 11.746 1 0.0006097 ***
capillary	anesthetized	19	mN1246L	Soma	0.652503	1.99166	9.33333			---
capillary	anesthetized	20	mN1246L	Process	1.53992	2.96552	78.6667			Signif. codes: 0 ‘***’ 0.001 ‘**’ 0.01 ‘*’ 0.05 ‘.’ 0.1 ‘ ’ 1
capillary	anesthetized	20	mN1246L	Soma	0.708363	3.05903	7.33333			Condition lsmean SE df lower.CL upper.CL
capillary	anesthetized	21	mN1246L	Process	1.23695	2.44603	55.3333			awake 2.624292 0.07241973 132 2.481038 2.767545
capillary	anesthetized	21	mN1246L	Soma	0.64539	1.43323	10			awake_EP 3.110335 0.11826093 132 2.876404 3.344267
capillary	anesthetized	22	mN1246L	Process	1.65308	2.67822	56			Degrees-of-freedom method: satterthwaite
capillary	anesthetized	22	mN1246L	Soma	2.84288	2.09708	9.33333			Confidence level used: 0.95
capillary	anesthetized	23	mN1246L	Process	1.80182	2.32407	24.6667			contrast estimate SE df t.ratio p.value
capillary	anesthetized	23	mN1246L	Soma	0.424512	2.58846	8.66667			awake - awake_EP -0.4860439 0.1386732 132 -3.505 0.0006
capillary	anesthetized	24	mN1246L	Process	1.13122	2.35383	42
capillary	anesthetized	24	mN1246L	Soma	0.7295	2.41022	8
capillary	anesthetized	25	mN1246L	Process	1.6717	1.92427	54.6667			anest._CP_vs_EP
capillary	anesthetized	25	mN1246L	Soma	1.20356	1.91047	10.6667			frequency
capillary	anesthetized	26	fN0690L	Process	2.28474	1.98433	82.6667			Soma
capillary	anesthetized	26	fN0690L	Soma	0.818639	4.99993	5.33333			Models:
capillary	anesthetized	27	fN0690L	Process	1.3799	2.54016	54.6667			freq.null: freq ~ (1 | animalname) + (1 | Spot)
capillary	anesthetized	27	fN0690L	Soma	6.11293	2.24429	6			freq.model2: freq ~ Condition + (1 | animalname) + (1 | Spot)
capillary	anesthetized	28	mN1246L	Process	1.59001	2.35077	106			Df AIC BIC logLik deviance Chisq Chi Df Pr(>Chisq)
capillary	anesthetized	28	mN1246L	Soma	0.67	2.50586	7.33333			freq.null 4 689.44 701.46 -340.72 681.44
capillary	anesthetized	29	mN1246L	Process	1.89446	2.45665	80			freq.model2 5 691.21 706.23 -340.60 681.21 0.2379 1 0.6257
capillary	anesthetized	29	mN1246L	Soma	0.97475	2.26913	9.33333			Condition lsmean SE df lower.CL upper.CL
capillary	anesthetized	30	mN1246L	Process	1.64264	2.72631	32.6667			anesthetized 8.185928 0.3217979 29.24 7.528012 8.843843
capillary	anesthetized	30	mN1246L	Soma	0.803113	2.32758	11.3333			anesthetized_EP 8.472248 0.4209750 35.59 7.611565 9.332931
capillary	anesthetized	31	mN1246L	Process	1.27631	2.10867	66			Degrees-of-freedom method: satterthwaite
capillary	anesthetized	31	mN1246L	Soma	0.673148	2.90223	8.66667			Confidence level used: 0.95
capillary	anesthetized	32	mN1246L	Process	0.834881	2.86146	93.3333			contrast estimate SE df t.ratio p.value
capillary	anesthetized	32	mN1246L	Soma	0.326319	2.11298	12			anesthetized - anesthetized_EP -0.2863199 0.4821032 53.65 -0.594 0.5551
capillary	anesthetized	33	mN1246L	Process	1.20244	2.25756	63.3333			Process
capillary	anesthetized	33	mN1246L	Soma	0.536607	1.608	13.3333			Models:
capillary	anesthetized	34	mN1247R	Process	1.01103	2.58752	33.3333			freq.null: freq ~ (1 | animalname) + (1 | Spot)
capillary	anesthetized	34	mN1247R	Soma	0.511785	2.69224	8			freq.model2: freq ~ Condition + (1 | animalname) + (1 | Spot)
capillary	anesthetized	35	mN1247R	Process	1.51859	2.51955	52			Df AIC BIC logLik deviance Chisq Chi Df Pr(>Chisq)
capillary	anesthetized	35	mN1247R	Soma	1.02453	2.15207	10			freq.null 4 1277.8 1289.7 -634.89 1269.8
capillary	anesthetized	36	mN1247R	Process	0.872568	2.14239	48			freq.model2 5 1243.1 1258.0 -616.56 1233.1 36.66 1 1.406e-09 ***
capillary	anesthetized	36	mN1247R	Soma	0.553455	2.35743	8			---
capillary	anesthetized	37	mN1246L	Process	0.864419	2.37384	34.6667			Signif. codes: 0 ‘***’ 0.001 ‘**’ 0.01 ‘*’ 0.05 ‘.’ 0.1 ‘ ’ 1
capillary	anesthetized	37	mN1246L	Soma	0.791303	3.2465	6			Condition lsmean SE df lower.CL upper.CL
capillary	anesthetized	38	mN1246L	Process	1.13161	2.13556	46			anesthetized 44.67661 2.101332 43.46 40.44017 48.91304
capillary	anesthetized	38	mN1246L	Soma	0.827385	2.96765	6			anesthetized_EP 21.31729 2.803916 47.83 15.66439 26.97019
capillary	anesthetized	39	mN1246L	Process	1.47157	2.43709	17.3333			Degrees-of-freedom method: satterthwaite
capillary	anesthetized	39	mN1246L	Soma	1.05669	2.89976	4.66667			Confidence level used: 0.95
capillary	anesthetized	40	mN1246L	Process	1.20253	2.24095	31.3333			contrast estimate SE df t.ratio p.value
capillary	anesthetized	40	mN1246L	Soma	0.470004	2.14974	10			anesthetized - anesthetized_EP 23.35932 3.287211 67.97 7.106 <.0001
capillary	anesthetized	41	mN1246L	Process	1.11332	2.66805	50.6667			amplitude
capillary	anesthetized	41	mN1246L	Soma	0.474131	2.77532	6.66667			Soma
capillary	anesthetized	42	mS02091LL	Process	1.42507	2.33344	62.6667			Models:
capillary	anesthetized	42	mS02091LL	Soma	3.10734	2.19653	9.33333			meanAmp.null: meanAmp ~ (1 | animalname) + (1 | Spot)
capillary	anesthetized	43	mS02091LL	Process	0.933169	2.6679	63.3333			meanAmp.model2: meanAmp ~ Condition + (1 | animalname) + (1 | Spot)
capillary	anesthetized	43	mS02091LL	Soma	0.48756	2.16054	10.6667			Df AIC BIC logLik deviance Chisq Chi Df Pr(>Chisq)
capillary	anesthetized	44	mS02090LR	Process	0.949685	2.86513	64.6667			meanAmp.null 4 426.80 438.82 -209.40 418.80
capillary	anesthetized	44	mS02090LR	Soma	0.422139	2.86732	8			meanAmp.model2 5 421.89 436.91 -205.94 411.89 6.915 1 0.008548 **
capillary	anesthetized	45	mS02090LR	Process	1.09074	3.0173	68.6667			---
capillary	anesthetized	45	mS02090LR	Soma	2.8439	1.90332	8.66667			Signif. codes: 0 ‘***’ 0.001 ‘**’ 0.01 ‘*’ 0.05 ‘.’ 0.1 ‘ ’ 1
capillary	anesthetized	46	mS02090LR	Process	1.32024	3.29246	53.3333			Condition lsmean SE df lower.CL upper.CL
capillary	anesthetized	46	mS02090LR	Soma	3.76174	2.23994	6.66667			anesthetized 1.0899987 0.1032511 144.18 0.8859173 1.2940800
capillary	anesthetized	47	mS02090LR	Process	0.888084	2.67778	18.6667			anesthetized_EP 0.7112389 0.1252009 108.45 0.4637725 0.9587052
capillary	anesthetized	47	mS02090LR	Soma	0.535473	2.17029	11.3333			Degrees-of-freedom method: satterthwaite
capillary	anesthetized	48	fSO4193R	Process	0.87751	3.2014	48.6667			Confidence level used: 0.95
capillary	anesthetized	48	fSO4235LL	Process	0.953662	2.0763	51.3333			contrast estimate SE df t.ratio p.value
capillary	anesthetized	49	fSO4193R	Soma	0.477739	2.84796	8.66667			anesthetized - anesthetized_EP 0.3787598 0.1411425 44.83 2.684 0.0102
capillary	anesthetized	49	fSO4235LL	Soma	0.699372	2.37365	8.66667			Process
capillary	anesthetized	50	fSO4193R	Process	1.43709	2.88994	42			Models:
capillary	anesthetized	50	fSO4235LL	Process	1.28228	2.44737	52			meanAmp.null: meanAmp ~ (1 | animalname) + (1 | Spot)
capillary	anesthetized	51	fSO4193R	Soma	0.892651	3.34108	6.66667			meanAmp.model2: meanAmp ~ Condition + (1 | animalname) + (1 | Spot)
capillary	anesthetized	51	fSO4235LL	Soma	1.28158	2.35813	6			Df AIC BIC logLik deviance Chisq Chi Df Pr(>Chisq)
capillary	anesthetized	52	fSO4193R	Process	1.54248	2.09212	47.3333			meanAmp.null 4 238.89 250.83 -115.45 230.89
capillary	anesthetized	52	fSO4235LL	Process	1.18487	2.33028	34			meanAmp.model2 5 240.78 255.70 -115.39 230.78 0.1119 1 0.738
capillary	anesthetized	53	fSO4193R	Soma	1.03676	1.88668	6.66667			Condition lsmean SE df lower.CL upper.CL
capillary	anesthetized	53	fSO4235LL	Soma	0.832787	2.29465	10			anesthetized 1.263887 0.05702042 145.53 1.151191 1.376582
capillary	anesthetized	54	female 6LL	Process	0.774469	3.36301	21.3333			anesthetized_EP 1.294065 0.07218227 133.22 1.151404 1.436726
capillary	anesthetized	54	female 6LL	Soma	0.648814	2.89633	6			Degrees-of-freedom method: satterthwaite
capillary	anesthetized	55	fSO9485LR	Process	1.11741	1.79877	44.6667			Confidence level used: 0.95
capillary	anesthetized	55	fSO9485LR	Soma	1.77158	1.74639	14			contrast estimate SE df t.ratio p.value
capillary	anesthetized	56	female 6LR	Process	1.31027	2.20002	30.6667			anesthetized - anesthetized_EP -0.03017832 0.08790052 98.72 -0.343 0.7321
capillary	anesthetized	56	female 6LR	Soma	0.411419	2.47241	9.33333			duration
capillary	anesthetized	57	fSO9485LR	Process	1.21234	1.81242	24			Soma
capillary	anesthetized	57	fSO9485LR	Soma	0.558025	2.06845	10			Models:
capillary	anesthetized	58	fSO8970L	Process	1.34905	2.05686	68			meanDur.null: meanDur ~ (1 | animalname) + (1 | Spot)
capillary	anesthetized	58	fSO8970L	Soma	1.38347	2.30787	8.66667			meanDur.model2: meanDur ~ Condition + (1 | animalname) + (1 | Spot)
capillary	anesthetized	59	fSO9485LR	Process	1.17614	1.93176	32.6667			Df AIC BIC logLik deviance Chisq Chi Df Pr(>Chisq)
capillary	anesthetized	59	fSO9485LR	Soma	0.78164	1.73393	14			meanDur.null 4 314.15 326.17 -153.08 306.15
capillary	anesthetized	60	fSO9485LR	Process	1.59408	2.29709	35.3333			meanDur.model2 5 305.92 320.94 -147.96 295.92 10.236 1 0.001378 **
capillary	anesthetized	60	fSO9485LR	Soma	0.705634	2.30943	10			---
capillary	anesthetized	61	fSO9485LR	Process	2.13277	1.74577	96			Signif. codes: 0 ‘***’ 0.001 ‘**’ 0.01 ‘*’ 0.05 ‘.’ 0.1 ‘ ’ 1
capillary	anesthetized	61	fSO9485LR	Soma	1.3248	1.939	11.3333			Condition lsmean SE df lower.CL upper.CL
capillary	anesthetized	62	female 6LR	Process	2.86533	2.35873	51.3333			anesthetized 2.480377 0.08505798 26.22 2.305610 2.655143
capillary	anesthetized	62	female 6LR	Soma	6.06262	2.03756	9.33333			anesthetized_EP 2.963066 0.11180771 29.65 2.733337 3.192794
capillary	anesthetized	63	female 6LR	Process	1.89723	2.2296	38			Degrees-of-freedom method: satterthwaite
capillary	anesthetized	63	female 6LR	Soma	0.831921	2.32066	7.33333			Confidence level used: 0.95
capillary	anesthetized	64	fSO8970L	Process	1.25167	2.17603	38			contrast estimate SE df t.ratio p.value
capillary	anesthetized	64	fSO8970L	Soma	1.29406	2.15039	10.6667			anesthetized - anesthetized_EP -0.4826889 0.1293987 47.06 -3.73 0.0005
capillary	anesthetized	65	fSO4235LL	Process	1.00415	2.68159	58.6667			Process
capillary	anesthetized	65	fSO4235LL	Soma	1.29307	2.16392	8.66667			Models:
capillary	anesthetized	66	fSO4235LL	Process	0.995904	2.20343	36			meanDur.null: meanDur ~ (1 | animalname) + (1 | Spot)
capillary	anesthetized	66	fSO4235LL	Soma	0.558859	3.13256	6			meanDur.model2: meanDur ~ Condition + (1 | animalname) + (1 | Spot)
capillary	anesthetized	67	fSO8970L	Process	1.24862	2.07084	48			Df AIC BIC logLik deviance Chisq Chi Df Pr(>Chisq)
capillary	anesthetized	67	fSO8970L	Soma	0.660318	2.22925	9.33333			meanDur.null 4 308.57 320.50 -150.28 300.57
capillary	anesthetized	68	fSO9485LR	Process	1.52328	1.75251	27.3333			meanDur.model2 5 281.12 296.04 -135.56 271.12 29.453 1 5.73e-08 ***
capillary	anesthetized	68	fSO9485LR	Soma	1.00041	2.79694	6.66667			---
capillary	anesthetized	69	fSO9485LR	Process	1.61618	1.6917	80			Signif. codes: 0 ‘***’ 0.001 ‘**’ 0.01 ‘*’ 0.05 ‘.’ 0.1 ‘ ’ 1
capillary	anesthetized	69	fSO9485LR	Soma	0.73355	3.04714	6.66667			Condition lsmean SE df lower.CL upper.CL
capillary	anesthetized	70	fSO9485LR	Process	0.85143	2.27319	56			anesthetized 2.503681 0.09416985 25.33 2.309863 2.697499
capillary	anesthetized	70	fSO9485LR	Soma	0.449774	2.17896	10			anesthetized_EP 3.333989 0.12251422 40.79 3.081833 3.586144
capillary	anesthetized	71	fSM1956LR	Process	2.24872	2.90755	18.6667			Degrees-of-freedom method: satterthwaite
capillary	anesthetized	71	fSM1956LR	Soma	8.14111	2.06672	8			Confidence level used: 0.95
capillary	anesthetized	72	fSM1955R	Process	0.759279	3.55206	25.3333			contrast estimate SE df t.ratio p.value
capillary	anesthetized	72	fSM1955R	Soma	0.503024	2.75422	10			anesthetized - anesthetized_EP -0.8303077 0.1375277 71.63 -6.037 <.0001
capillary	anesthetized	73	fSL5614L	Process	1.51955	2.84436	50.6667
capillary	anesthetized	73	fSL5614L	Soma	0.961133	1.89735	5.33333
capillary	anesthetized	74	fSL5614L	Process	0.62769	2.54107	12			anest._EP_vs_awakeEP
capillary	anesthetized	74	fSL5614L	Soma	0.866817	1.99646	7.33333			frequency
capillary	anesthetized	75	fSM1956LR	Process	0.947209	1.69314	35.3333			Soma
capillary	anesthetized	75	fSM1956LR	Soma	0.9687	2.53653	7.33333			Models:
capillary	anesthetized	76	fSL5884L	Process	0.514168	3.42531	37.3333			freq.null: freq ~ (1 | animalname)
capillary	anesthetized	76	mSL5879R	Process	0.84038	3.26936	14			freq.model2: freq ~ Condition + (1 | animalname)
capillary	anesthetized	77	fSL5884L	Soma	0.57402	2.17614	11.3333			Df AIC BIC logLik deviance Chisq Chi Df Pr(>Chisq)
capillary	anesthetized	77	mSL5879R	Soma	0.248993	2.2097	8.66667			freq.null 3 427.66 434.99 -210.83 421.66
capillary	anesthetized	78	mSL5879R	Process	1.64389	3.12679	36.6667			freq.model2 4 429.40 439.18 -210.70 421.40 0.2592 1 0.6106
capillary	anesthetized	78	mSL5879R	Soma	1.01682	2.35365	10.6667			Condition lsmean SE df lower.CL upper.CL
capillary	anesthetized	79	mSL5880LR	Process	1.45527	1.94277	26.6667			anesthetized 8.553588 0.5234061 14.48 7.434486 9.672689
capillary	anesthetized	79	mSL5880LR	Soma	0.510673	2.76644	6			awake 9.035427 0.7795560 4.80 7.368648 10.702206
capillary	anesthetized	80	fSM1956LR	Process	0.996938	2.15558	29.3333			Degrees-of-freedom method: satterthwaite
capillary	anesthetized	80	fSM1956LR	Soma	0.918467	1.90999	6.66667			Confidence level used: 0.95
capillary	anesthetized	81	fSM1956LR	Process	1.09178	1.86755	50			contrast estimate SE df t.ratio p.value
capillary	anesthetized	81	fSM1956LR	Soma	2.0296	1.67332	12			anesthetized - awake -0.4818394 0.9389684 6.41 -0.513 0.6251
capillary	anesthetized	82	fSM1955R	Process	1.34209	2.47023	39.3333			Process
capillary	anesthetized	82	fSM1956LR	Process	0.951043	2.0272	18.6667			Models:
capillary	anesthetized	83	fSM1955R	Soma	0.746109	3.22854	6.66667			freq.null: freq ~ (1 | animalname)
capillary	anesthetized	83	fSM1956LR	Soma	0.351281	2.69397	8			freq.model2: freq ~ Condition + (1 | animalname)
capillary	anesthetized	84	mSL5879R	Process	1.01781	3.11979	32			Df AIC BIC logLik deviance Chisq Chi Df Pr(>Chisq)
capillary	anesthetized	84	mSL5879R	Soma	0.601255	2.88743	8.66667			freq.null 3 644.42 651.75 -319.21 638.42
capillary	anesthetized	85	mSL5879R	Process	1.05192	3.03059	22			freq.model2 4 646.40 656.17 -319.20 638.40 0.0177 1 0.8943
capillary	anesthetized	85	mSL5879R	Soma	0.422374	2.45951	8			Condition lsmean SE df lower.CL upper.CL
capillary	anesthetized	86	fSL5884L	Process	0.433367	2.62212	40.6667			anesthetized 21.02442 2.066267 18.66 16.69437 25.35447
capillary	anesthetized	86	fSL5884L	Soma	0.181177	3.13259	7.33333			awake 20.49250 3.341884 6.61 13.48927 27.49572
capillary	anesthetized	87	fSL5884L	Process	1.89503	2.00999	40			Degrees-of-freedom method: satterthwaite
capillary	anesthetized	87	fSL5884L	Soma	1.30282	2.5014	7.33333			Confidence level used: 0.95
capillary	anesthetized	88	fSL5884L	Process	1.25774	2.29281	22.6667			contrast estimate SE df t.ratio p.value
capillary	anesthetized	88	fSL5884L	Soma	0.225254	3.26727	2			anesthetized - awake 0.5319243 3.929077 8.43 0.135 0.8955
capillary	anesthetized	89	fSP6953LR	Process	1.09325	3.13855	50.6667			amplitude
capillary	anesthetized	89	fSP6953LR	Soma	0.565223	3.07811	5.33333			Soma
capillary	anesthetized	90	fSL7168LR	Process	1.20491	2.58463	34.6667			Models:
capillary	anesthetized	90	fSL7168LR	Soma	0.850146	2.69941	8			meanAmp.null: meanAmp ~ (1 | animalname)
capillary	anesthetized	91	mSP8227L	Process	1.08803	2.61865	34			meanAmp.model2: meanAmp ~ Condition + (1 | animalname)
capillary	anesthetized	91	mSP8227L	Soma	0.850146	2.69941	8			Df AIC BIC logLik deviance Chisq Chi Df Pr(>Chisq)
capillary	anesthetized	92	fSL9054R	Process	0.967028	2.14465	63.3333			meanAmp.null 3 98.928 106.26 -46.464 92.928
capillary	anesthetized	92	fSL9054R	Soma	1.22432	2.10727	10			meanAmp.model2 4 99.590 109.36 -45.795 91.590 1.3379 1 0.2474
capillary	anesthetized	93	fSP8231L	Process	1.80537	2.23747	61.3333			Condition lsmean SE df lower.CL upper.CL
capillary	anesthetized	93	fSP8231L	Soma	0.433669	3.70461	4.66667			anesthetized 0.6005332 0.05696480 85 0.4872719 0.7137945
capillary	awake	1	P2	Soma	0.202582	2.16764	9.33333			awake 0.4927223 0.07331106 85 0.3469603 0.6384843
capillary	awake	1	P2	Process	0.422536	2.12511	41.3333			Degrees-of-freedom method: satterthwaite
capillary	awake	2	P1	Process	0.5016	3.90417	28			Confidence level used: 0.95
capillary	awake	3	P2	Process	0.570937	2.02483	29.3333			contrast estimate SE df t.ratio p.value
capillary	awake	2	P1	Soma	0.386904	2.20098	8			anesthetized - awake 0.1078109 0.09284126 85 1.161 0.2488
capillary	awake	3	P2	Soma	0.818037	2.50549	8			Process
capillary	awake	4	P2	Process	0.966562	2.21629	26			Models:
capillary	awake	4	P2	Soma	0.274558	1.51711	11.3333			meanAmp.null: meanAmp ~ (1 | animalname)
capillary	awake	5	P1	Process	0.714669	2.60381	32.6667			meanAmp.model2: meanAmp ~ Condition + (1 | animalname)
capillary	awake	5	P1	Soma	0.256653	1.46884	10.6667			Df AIC BIC logLik deviance Chisq Chi Df Pr(>Chisq)
capillary	awake	6	P1	Process	0.743918	1.84122	27.3333			meanAmp.null 3 181.25 188.58 -87.624 175.25
capillary	awake	6	P1	Soma	0.310691	1.68027	12			meanAmp.model2 4 177.76 187.53 -84.880 169.76 5.4882 1 0.01915 *
capillary	awake	7	P1	Process	0.866013	4.05209	32			---
capillary	awake	7	P1	Soma	0.294506	2.20001	10.6667			Signif. codes: 0 ‘***’ 0.001 ‘**’ 0.01 ‘*’ 0.05 ‘.’ 0.1 ‘ ’ 1
capillary	awake	8	P1	Process	0.536824	2.88706	24.6667			Condition lsmean SE df lower.CL upper.CL
capillary	awake	8	P1	Soma	0.53446	2.28674	9.33333			anesthetized 1.2747030 0.09022092 85 1.0953197 1.454086
capillary	awake	9	P1	Process	1.92994	2.53454	24			awake 0.8739999 0.11611015 85 0.6431418 1.104858
capillary	awake	9	P1	Soma	0.579917	2.05939	3.33333			Degrees-of-freedom method: satterthwaite
capillary	awake	10	P1	Process	0.512754	2.69474	32			Confidence level used: 0.95
capillary	awake	10	P1	Soma	0.337397	2.64503	11.3333			contrast estimate SE df t.ratio p.value
capillary	awake	11	P1	Process	0.62948	2.74834	24.6667			anesthetized - awake 0.4007031 0.1470421 85 2.725 0.0078
capillary	awake	11	P1	Soma	0.270539	2.06652	12.6667			duration
capillary	awake	12	P1	Process	0.638183	1.94946	37.3333			Soma
capillary	awake	12	P1	Soma	0.292836	2.60163	8.66667			Models:
capillary	awake	13	P1	Process	0.736523	2.92799	32.6667			meanDur.null: meanDur ~ (1 | animalname)
capillary	awake	13	P1	Soma	0.372583	3.09716	6.66667			meanDur.model2: meanDur ~ Condition + (1 | animalname)
capillary	awake	14	P1	Process	0.287922	3.05326	33.3333			Df AIC BIC logLik deviance Chisq Chi Df Pr(>Chisq)
capillary	awake	15	P2	Process	0.469884	3.80779	28.6667			meanDur.null 3 221.15 228.48 -107.58 215.15
capillary	awake	14	P1	Soma	0.260499	3.23743	6			meanDur.model2 4 221.79 231.56 -106.89 213.79 1.3649 1 0.2427
capillary	awake	15	P2	Soma	0.347286	1.67217	13.3333			Condition lsmean SE df lower.CL upper.CL
capillary	awake	16	P1	Process	0.912372	3.12255	26.6667			anesthetized 2.968089 0.1389088 8.66 2.651953 3.284224
capillary	awake	16	P1	Soma	0.329484	2.21803	6.66667			awake 2.624352 0.1906718 3.37 2.190412 3.058292
capillary	awake	17	P1	Process	0.537875	2.00412	42			Degrees-of-freedom method: satterthwaite
capillary	awake	17	P1	Soma	0.212245	3.09676	5.33333			Confidence level used: 0.95
capillary	awake	18	P1	Process	0.450201	2.62838	32.6667			contrast estimate SE df t.ratio p.value
capillary	awake	18	P1	Soma	0.232106	1.88136	12			anesthetized - awake 0.3437365 0.2359055 4.47 1.457 0.2116
capillary	awake	19	P2	Process	0.379446	2.28795	24.6667			Process
capillary	awake	19	P2	Soma	0.200123	2.36839	4			Models:
capillary	awake	20	P2	Process	0.377261	3.63804	38			meanDur.null: meanDur ~ (1 | animalname)
capillary	awake	20	P2	Soma	0.241963	3.04422	10			meanDur.model2: meanDur ~ Condition + (1 | animalname)
capillary	awake	21	P1	Soma	0.336477	2.9536	5.33333			Df AIC BIC logLik deviance Chisq Chi Df Pr(>Chisq)
capillary	awake	21	P1	Process	0.345985	2.42091	56			meanDur.null 3 216.64 223.97 -105.32 210.64
capillary	awake	22	P1	Process	0.354711	3.37484	35.3333			meanDur.model2 4 214.09 223.86 -103.05 206.09 4.5528 1 0.03287 *
capillary	awake	22	P1	Soma	0.191552	3.81124	6.66667			---
capillary	awake	23	P1	Process	0.384277	2.24447	24.6667			Signif. codes: 0 ‘***’ 0.001 ‘**’ 0.01 ‘*’ 0.05 ‘.’ 0.1 ‘ ’ 1
capillary	awake	23	P1	Soma	0.272096	1.91123	10.6667			Condition lsmean SE df lower.CL upper.CL
capillary	awake	24	P1	Soma	0.226245	3.38501	6			anesthetized 3.356433 0.1117174 85 3.134309 3.578557
capillary	awake	24	P1	Process	0.515042	2.18091	60			awake 2.904987 0.1437752 85 2.619124 3.190851
capillary	awake	25	P3	Process	0.304373	2.67329	76			Degrees-of-freedom method: satterthwaite
capillary	awake	25	P3	Soma	0.195734	1.85017	6			Confidence level used: 0.95
capillary	awake	26	P3	Process	0.465392	2.83332	29.3333			contrast estimate SE df t.ratio p.value
capillary	awake	26	P3	Soma	0.329168	1.76759	12			anesthetized - awake 0.451446 0.1820771 85 2.479 0.0151
capillary	awake	27	P3	Process	0.698862	2.6016	32.6667
capillary	awake	27	P3	Soma	0.247995	2.73644	8
capillary	awake	28	P3	Process	0.575776	1.99709	42
capillary	awake	28	P3	Soma	0.244739	3.21751	4
capillary	awake	29	P3	Process	0.380267	2.12088	29.3333
capillary	awake	29	P3	Soma	0.293991	1.81884	10
capillary	awake	30	P3	Process	0.758929	2.06033	28.6667
capillary	awake	30	P3	Soma	0.422588	2.53877	4.66667
capillary	awake	31	P3	Process	0.360132	2.70544	74.6667
capillary	awake	31	P3	Soma	0.131613	2.55774	4.66667
capillary	awake	32	P3	Process	0.973019	3.52885	27.3333
capillary	awake	32	P3	Soma	0.351429	2.70945	5.33333
capillary	awake	33	P3	Process	0.618862	2.04751	27.3333
capillary	awake	33	P3	Soma	0.1951	2.01493	4
capillary	awake	34	P3	Process	1.19568	4.37554	22.6667
capillary	awake	34	P3	Soma	0.256481	2.50129	8.66667
capillary	awake	35	P3	Process	0.721911	2.37188	32
capillary	awake	35	P3	Soma	0.242264	1.93942	2.66667
capillary	awake	36	P3	Soma	0.245405	2.50668	7.33333
capillary	awake	36	P3	Process	0.247183	3.09438	29.3333
capillary	awake	37	P3	Process	1.03176	2.6359	26.6667
capillary	awake	37	P3	Soma	0.451995	3.74408	3.33333
capillary	awake	38	P3	Process	0.865315	3.01316	30.6667
capillary	awake	38	P3	Soma	0.199792	2.63269	4.66667
capillary	awake	39	P3	Soma	0.161118	2.75911	4
capillary	awake	39	P3	Process	0.559441	2.18982	46.6667
capillary	awake	40	P3	Process	0.823131	2.29774	45.3333
capillary	awake	40	P3	Soma	0.276637	1.94857	5.33333
capillary	awake	41	P3	Process	1.35284	1.79615	35.3333
capillary	awake	41	P3	Soma	0.312917	1.93889	4
capillary	awake	42	P3	Process	0.531377	2.2628	32
capillary	awake	42	P3	Soma	0.213196	2.3435	6
capillary	awake	43	P3	Process	0.834951	2.86436	32
capillary	awake	43	P3	Soma	0.294435	2.52886	9.33333
capillary	awake	44	P3	Process	0.50364	2.04535	56
capillary	awake	44	P3	Soma	0.1984	1.80521	4
capillary	awake	45	P3	Process	0.38809	3.68711	20.6667
capillary	awake	45	P3	Soma	0.212853	2.10593	8
capillary	awake	46	P3	Process	0.702919	2.162	48
capillary	awake	46	P3	Soma	0.234371	1.40222	3.33333
capillary	awake	47	P3	Soma	0.317913	1.86405	12
capillary	awake	47	P3	Process	0.459789	2.65254	51.3333
capillary	awake	48	P3	Process	1.21293	2.53489	32
capillary	awake	48	P3	Soma	0.503582	2.1345	6
capillary	awake	49	P3	Soma	0.192248	2.26272	7.33333
capillary	awake	49	P3	Process	0.542985	2.21002	78.6667
capillary	awake	50	P3	Process	0.987947	2.27813	60
capillary	awake	50	P3	Soma	0.658562	3.84622	5.33333
capillary	awake	51	P3	Soma	0.201367	2.03227	4.66667
capillary	awake	51	P3	Process	0.66007	2.40802	30
capillary	awake	52	P3	Soma	0.3131	2.01493	7.33333
capillary	awake	52	P3	Process	0.58138	1.98221	41.3333
capillary	awake	53	P3	Soma	0.278238	2.65191	8.66667
capillary	awake	53	P3	Process	0.734425	2.34366	35.3333
capillary	awake	54	P3	Process	0.58735	2.80101	34
capillary	awake	54	P3	Soma	0.237577	2.20679	7.33333
capillary	awake	55	P3	Process	1.19623	3.0403	56
capillary	awake	55	P3	Soma	0.273333	2.85174	8
capillary	awake	56	P3	Process	0.512703	2.5137	70.6667
capillary	awake	56	P3	Soma	0.195667	4.25411	2.66667
capillary	awake	57	P3	Process	0.664477	2.8748	44
capillary	awake	57	P3	Soma	0.194747	1.88019	5.33333
capillary	awake	58	P3	Process	0.648861	2.71445	37.3333
capillary	awake	58	P3	Soma	0.286865	3.70032	4
capillary	awake	59	P3	Process	0.507781	3.31227	23.3333
capillary	awake	59	P3	Soma	0.296649	1.71733	11.3333
capillary	awake	60	P3	Process	0.360197	2.19552	62.6667
capillary	awake	60	P3	Soma	0.153202	2.04983	6.66667
capillary	awake	61	P3	Process	0.337195	4.94839	36.6667
capillary	awake	61	P3	Soma	0.293912	2.35572	8.66667
capillary	awake	62	P3	Process	0.492972	2.44459	34
capillary	awake	62	P3	Soma	0.189796	2.40866	4.66667
capillary	awake	63	P3	Process	1.33384	2.20834	46
capillary	awake	63	P3	Soma	0.184888	2.77099	4
capillary	awake	64	P3	Process	0.416966	2.07781	30
capillary	awake	64	P3	Soma	0.300211	2.25609	7.33333
capillary	awake	65	P3	Soma	0.347752	2.13651	10
capillary	awake	65	P3	Process	0.294053	2.52826	24.6667
capillary	awake	66	P3	Soma	0.310317	2.12539	10.6667
capillary	awake	66	P3	Process	0.564038	2.15841	41.3333
capillary	awake	67	P3	Process	0.60826	2.26383	20.6667
capillary	awake	67	P3	Soma	0.414693	3.56718	2
capillary	awake	68	P3	Process	0.914993	2.55735	44.6667
capillary	awake	68	P3	Soma	0.284225	2.89611	6
capillary	awake	69	P3	Process	0.664275	2.48303	42.6667
capillary	awake	69	P3	Soma	0.221313	2.99031	4
capillary	awake	70	P3	Process	0.665534	4.21058	19.3333
capillary	awake	70	P3	Soma	0.32099	2.1502	9.33333
capillary	awake	71	P3	Process	0.658319	2.48921	45.3333
capillary	awake	71	P3	Soma	0.44769	2.40762	4.66667
capillary	awake	72	P3	Process	0.538756	1.71104	37.3333
capillary	awake	72	P3	Soma	0.236619	3.81871	4
capillary	awake	73	P3	Process	0.971241	2.29339	48.6667
capillary	awake	73	P3	Soma	0.310313	2.39537	6.66667
capillary	awake	74	P3	Process	0.60671	3.44741	24
capillary	awake	74	P3	Soma	0.21272	3.40881	4.66667
capillary	awake	75	P3	Process	0.570986	2.55334	76
capillary	awake	75	P3	Soma	0.231502	1.97146	8
capillary	awake	76	P3	Soma	0.213273	2.51813	5.33333
capillary	awake	76	P3	Process	0.494001	3.01402	35.3333
capillary	awake	77	P3	Process	0.842549	2.36725	53.3333
capillary	awake	77	P3	Soma	0.349898	1.82631	4.66667
capillary	awake	78	P3	Process	0.707834	2.20264	45.3333
capillary	awake	78	P3	Soma	0.257532	4.09488	5.33333
capillary	awake	79	P3	Process	0.732605	2.70978	38
capillary	awake	79	P3	Soma	0.197421	2.44077	6
capillary	awake	80	P3	Process	1.42703	2.03268	23.3333
capillary	awake	80	P3	Soma	0.296825	1.799	9.33333
capillary	awake	81	P3	Process	0.699339	3.078	47.3333
capillary	awake	81	P3	Soma	0.293906	1.79368	8.66667
capillary	awake	82	P3	Process	0.597227	2.03257	34
capillary	awake	82	P3	Soma	0.212943	1.84314	6.66667
capillary	awake	83	P3	Process	0.779173	2.25039	76.6667
capillary	awake	83	P3	Soma	0.491639	2.24937	6
capillary	awake	84	P3	Process	0.83989	2.34551	52
capillary	awake	84	P3	Soma	0.374091	2.48518	5.33333
capillary	awake	85	P3	Process	0.521114	3.76692	30.6667
capillary	awake	85	P3	Soma	0.453341	1.68494	10
capillary	awake	86	P3	Process	0.429111	2.79947	56.6667
capillary	awake	86	P3	Soma	0.200292	3.21459	6
capillary	awake	87	P3	Process	0.678763	2.24107	34.6667
capillary	awake	87	P3	Soma	0.32478	1.3936	5.33333
capillary	awake	88	P3	Process	0.532285	2.04133	46.6667
capillary	awake	88	P3	Soma	0.281243	1.82382	4.66667
capillary	awake	89	P3	Process	0.483699	2.13468	43.3333
capillary	awake	89	P3	Soma	0.246749	2.13465	4
capillary	awake	90	P3	Process	0.782334	3.21634	35.3333
capillary	awake	90	P3	Soma	0.264352	3.22398	6
capillary	awake	91	P3	Process	0.452638	2.13483	32
capillary	awake	91	P3	Soma	0.286624	1.46663	4
capillary	awake	92	P3	Process	0.584668	2.40514	52
capillary	awake	92	P3	Soma	0.221192	2.92702	6
capillary	awake	93	P3	Process	0.918333	2.85287	30.6667
capillary	awake	93	P3	Soma	0.253516	3.13257	5.33333
capillary	awake	94	P3	Process	0.485059	2.5371	61.3333
capillary	awake	94	P3	Soma	0.238314	2.77069	6
capillary	awake	95	P3	Process	0.764952	2.75261	74.6667
capillary	awake	95	P3	Soma	0.352188	1.77529	12
capillary	awake	96	P3	Process	0.562329	2.14295	55.3333
capillary	awake	96	P3	Soma	0.145362	2.80674	3.33333
