# Supplementary material for: Distinct signatures of calcium activity in brain mural cells
Source: eLife. 2021 Jul 6;10:e70591. doi: 10.7554/eLife.70591 (PMC8294852; doi:10.7554/eLife.70591)
Supplement: Figure 3—figure supplement 1—source data 1. [file elife-70591-fig3-figsupp1-data1.xlsx]

## Sheet: fig3-fig-suppl.1
raw data for figure 3 figure supplement 1
Condition	Spot	animalname	ROIType	meanAmp	meanDur
awake	1	P2	Soma	0.202582	2.16764
awake	1	P2	Process	0.422536	2.12511
awake	2	P1	Process	0.5016	3.90417
awake	3	P2	Process	0.570937	2.02483
awake	2	P1	Soma	0.386904	2.20098
awake	3	P2	Soma	0.818037	2.50549
awake	4	P2	Process	0.966562	2.21629
awake	4	P2	Soma	0.274558	1.51711
awake	5	P1	Process	0.714669	2.60381
awake	5	P1	Soma	0.256653	1.46884
awake	6	P1	Process	0.743918	1.84122
awake	6	P1	Soma	0.310691	1.68027
awake	7	P1	Process	0.866013	4.05209
awake	7	P1	Soma	0.294506	2.20001
awake	8	P1	Process	0.536824	2.88706
awake	8	P1	Soma	0.53446	2.28674
awake	9	P1	Process	1.92994	2.53454
awake	9	P1	Soma	0.579917	2.05939
awake	10	P1	Process	0.512754	2.69474
awake	10	P1	Soma	0.337397	2.64503
awake	11	P1	Process	0.62948	2.74834
awake	11	P1	Soma	0.270539	2.06652
awake	12	P1	Process	0.638183	1.94946
awake	12	P1	Soma	0.292836	2.60163			awake_vs._exvivo
awake	13	P1	Process	0.736523	2.92799			amplitude
awake	13	P1	Soma	0.372583	3.09716			Process
awake	14	P1	Process	0.287922	3.05326			Models:
awake	15	P2	Process	0.469884	3.80779			meanAmp.null: meanAmp ~ (1 | animalname) + (1 | Spot)
awake	14	P1	Soma	0.260499	3.23743			meanAmp.model2: meanAmp ~ Condition + (1 | animalname) + (1 | Spot)
awake	15	P2	Soma	0.347286	1.67217			Df AIC BIC logLik deviance Chisq Chi Df Pr(>Chisq)
awake	16	P1	Process	0.912372	3.12255			meanAmp.null 4 325.90 339.13 -158.95 317.90
awake	16	P1	Soma	0.329484	2.21803			meanAmp.model2 5 309.12 325.66 -149.56 299.12 18.779 1 1.468e-05 ***
awake	17	P1	Process	0.537875	2.00412			---
awake	17	P1	Soma	0.212245	3.09676			Signif. codes: 0 ‘***’ 0.001 ‘**’ 0.01 ‘*’ 0.05 ‘.’ 0.1 ‘ ’ 1
awake	18	P1	Process	0.450201	2.62838			Condition lsmean SE df lower.CL upper.CL
awake	18	P1	Soma	0.232106	1.88136			awake 0.6652134 0.19869893 12.56 0.2344338 1.095993
awake	19	P2	Process	0.379446	2.28795			ex_vivo 1.7970823 0.06567786 44.60 1.6546926 1.939472
awake	19	P2	Soma	0.200123	2.36839			Degrees-of-freedom method: satterthwaite
awake	20	P2	Process	0.377261	3.63804			Confidence level used: 0.95
awake	20	P2	Soma	0.241963	3.04422			contrast estimate SE df t.ratio p.value
awake	21	P1	Soma	0.336477	2.9536			awake - ex_vivo -1.131869 0.2092722 13.85 -5.409 0.0001
awake	21	P1	Process	0.345985	2.42091			Soma
awake	22	P1	Process	0.354711	3.37484			Models:
awake	22	P1	Soma	0.191552	3.81124			meanAmp.null: meanAmp ~ (1 | animalname) + (1 | Spot)
awake	23	P1	Process	0.384277	2.24447			meanAmp.model2: meanAmp ~ Condition + (1 | animalname) + (1 | Spot)
awake	23	P1	Soma	0.272096	1.91123			Df AIC BIC logLik deviance Chisq Chi Df Pr(>Chisq)
awake	24	P1	Soma	0.226245	3.38501			meanAmp.null 4 688.39 701.63 -340.20 680.39
awake	24	P1	Process	0.515042	2.18091			meanAmp.model2 5 682.76 699.30 -336.38 672.76 7.6369 1 0.005718 **
awake	25	P3	Process	0.304373	2.67329			---
awake	25	P3	Soma	0.195734	1.85017			Signif. codes: 0 ‘***’ 0.001 ‘**’ 0.01 ‘*’ 0.05 ‘.’ 0.1 ‘ ’ 1
awake	26	P3	Process	0.465392	2.83332			Condition lsmean SE df lower.CL upper.CL
awake	26	P3	Soma	0.329168	1.76759			awake 0.3391262 0.4363933 10.46 -0.6274911 1.305743
awake	27	P3	Process	0.698862	2.6016			ex_vivo 1.7945963 0.1555484 48.62 1.4500544 2.139138
awake	27	P3	Soma	0.247995	2.73644			Degrees-of-freedom method: satterthwaite
awake	28	P3	Process	0.575776	1.99709			Confidence level used: 0.95
awake	28	P3	Soma	0.244739	3.21751			contrast estimate SE df t.ratio p.value
awake	29	P3	Process	0.380267	2.12088			awake - ex_vivo -1.45547 0.4632866 11.9 -3.142 0.0086
awake	29	P3	Soma	0.293991	1.81884
awake	30	P3	Process	0.758929	2.06033			duration
awake	30	P3	Soma	0.422588	2.53877			Process
awake	31	P3	Process	0.360132	2.70544			Models:
awake	31	P3	Soma	0.131613	2.55774			meanDur.null: meanDur ~ (1 | animalname) + (1 | Spot)
awake	32	P3	Process	0.973019	3.52885			meanDur.model2: meanDur ~ Condition + (1 | animalname) + (1 | Spot)
awake	32	P3	Soma	0.351429	2.70945			Df AIC BIC logLik deviance Chisq Chi Df Pr(>Chisq)
awake	33	P3	Process	0.618862	2.04751			meanDur.null 4 337.91 351.14 -164.95 329.91
awake	33	P3	Soma	0.1951	2.01493			meanDur.model2 5 323.60 340.14 -156.80 313.60 16.31 1 5.377e-05 ***
awake	34	P3	Process	1.19568	4.37554			---
awake	34	P3	Soma	0.256481	2.50129			Signif. codes: 0 ‘***’ 0.001 ‘**’ 0.01 ‘*’ 0.05 ‘.’ 0.1 ‘ ’ 1
awake	35	P3	Process	0.721911	2.37188			Condition lsmean SE df lower.CL upper.CL
awake	35	P3	Soma	0.242264	1.93942			awake 2.624292 0.05367102 202 2.518464 2.730119
awake	36	P3	Soma	0.245405	2.50668			ex_vivo 2.243082 0.05107666 202 2.142370 2.343793
awake	36	P3	Process	0.247183	3.09438			Degrees-of-freedom method: satterthwaite
awake	37	P3	Process	1.03176	2.6359			Confidence level used: 0.95
awake	37	P3	Soma	0.451995	3.74408			contrast estimate SE df t.ratio p.value
awake	38	P3	Process	0.865315	3.01316			awake - ex_vivo 0.38121 0.07409051 202 5.145 <.0001
awake	38	P3	Soma	0.199792	2.63269			Soma
awake	39	P3	Soma	0.161118	2.75911			Models:
awake	39	P3	Process	0.559441	2.18982			meanDur.null: meanDur ~ (1 | animalname) + (1 | Spot)
awake	40	P3	Process	0.823131	2.29774			meanDur.model2: meanDur ~ Condition + (1 | animalname) + (1 | Spot)
awake	40	P3	Soma	0.276637	1.94857			Df AIC BIC logLik deviance Chisq Chi Df Pr(>Chisq)
awake	41	P3	Process	1.35284	1.79615			meanDur.null 4 365.35 378.58 -178.67 357.35
awake	41	P3	Soma	0.312917	1.93889			meanDur.model2 5 354.59 371.13 -172.30 344.59 12.755 1 0.0003551 ***
awake	42	P3	Process	0.531377	2.2628			---
awake	42	P3	Soma	0.213196	2.3435			Signif. codes: 0 ‘***’ 0.001 ‘**’ 0.01 ‘*’ 0.05 ‘.’ 0.1 ‘ ’ 1
awake	43	P3	Process	0.834951	2.86436			Condition lsmean SE df lower.CL upper.CL
awake	43	P3	Soma	0.294435	2.52886			awake 2.437241 0.05795064 202 2.322976 2.551507
awake	44	P3	Process	0.50364	2.04535			ex_vivo 2.066154 0.05514942 202 1.957412 2.174896
awake	44	P3	Soma	0.1984	1.80521			Degrees-of-freedom method: satterthwaite
awake	45	P3	Process	0.38809	3.68711			Confidence level used: 0.95
awake	45	P3	Soma	0.212853	2.10593			contrast estimate SE df t.ratio p.value
awake	46	P3	Process	0.702919	2.162			awake - ex_vivo 0.3710874 0.07999835 202 4.639 <.0001
awake	46	P3	Soma	0.234371	1.40222
awake	47	P3	Soma	0.317913	1.86405			awake_vs._anest.
awake	47	P3	Process	0.459789	2.65254			amplitude
awake	48	P3	Process	1.21293	2.53489			Process
awake	48	P3	Soma	0.503582	2.1345			Models:
awake	49	P3	Soma	0.192248	2.26272			meanAmp.null: meanAmp ~ (1 | animalname) + (1 | Spot)
awake	49	P3	Process	0.542985	2.21002			meanAmp.model2: meanAmp ~ Condition + (1 | animalname) + (1 | Spot)
awake	50	P3	Process	0.987947	2.27813			Df AIC BIC logLik deviance Chisq Chi Df Pr(>Chisq)
awake	50	P3	Soma	0.658562	3.84622			meanAmp.null 4 154.90 167.87 -73.449 146.90
awake	51	P3	Soma	0.201367	2.03227			meanAmp.model2 5 136.05 152.26 -63.024 126.05 20.852 1 4.963e-06 ***
awake	51	P3	Process	0.66007	2.40802			---
awake	52	P3	Soma	0.3131	2.01493			Signif. codes: 0 ‘***’ 0.001 ‘**’ 0.01 ‘*’ 0.05 ‘.’ 0.1 ‘ ’ 1
awake	52	P3	Process	0.58138	1.98221			Condition lsmean SE df lower.CL upper.CL
awake	53	P3	Soma	0.278238	2.65191			anesthetized 1.2754749 0.03631733 180.10 1.2038127 1.3471372
awake	53	P3	Process	0.734425	2.34366			awake 0.6628306 0.03524166 182.65 0.5932909 0.7323703
awake	54	P3	Process	0.58735	2.80101			Degrees-of-freedom method: satterthwaite
awake	54	P3	Soma	0.237577	2.20679			Confidence level used: 0.95
awake	55	P3	Process	1.19623	3.0403			contrast estimate SE df t.ratio p.value
awake	55	P3	Soma	0.273333	2.85174			anesthetized - awake 0.6126443 0.05060557 181.39 12.106 <.0001
awake	56	P3	Process	0.512703	2.5137
awake	56	P3	Soma	0.195667	4.25411			Soma
awake	57	P3	Process	0.664477	2.8748			Models:
awake	57	P3	Soma	0.194747	1.88019			meanAmp.null: meanAmp ~ (1 | animalname) + (1 | Spot)
awake	58	P3	Process	0.648861	2.71445			meanAmp.model2: meanAmp ~ Condition + (1 | animalname) + (1 | Spot)
awake	58	P3	Soma	0.286865	3.70032			Df AIC BIC logLik deviance Chisq Chi Df Pr(>Chisq)
awake	59	P3	Process	0.507781	3.31227			meanAmp.null 4 494.68 507.65 -243.34 486.68
awake	59	P3	Soma	0.296649	1.71733			meanAmp.model2 5 487.05 503.26 -238.53 477.05 9.6294 1 0.001915 **
awake	60	P3	Process	0.360197	2.19552			---
awake	60	P3	Soma	0.153202	2.04983			Signif. codes: 0 ‘***’ 0.001 ‘**’ 0.01 ‘*’ 0.05 ‘.’ 0.1 ‘ ’ 1
awake	61	P3	Process	0.337195	4.94839			Condition lsmean SE df lower.CL upper.CL
awake	61	P3	Soma	0.293912	2.35572			anesthetized 1.148557 0.09460536 181.37 0.9618885 1.3352258
awake	62	P3	Process	0.492972	2.44459			awake 0.286853 0.09159058 181.84 0.1061329 0.4675732
awake	62	P3	Soma	0.189796	2.40866			Degrees-of-freedom method: satterthwaite
awake	63	P3	Process	1.33384	2.20834			Confidence level used: 0.95
awake	63	P3	Soma	0.184888	2.77099			contrast estimate SE df t.ratio p.value
awake	64	P3	Process	0.416966	2.07781			anesthetized - awake 0.8617041 0.1316777 181.6 6.544 <.0001
awake	64	P3	Soma	0.300211	2.25609
awake	65	P3	Soma	0.347752	2.13651			duration
awake	65	P3	Process	0.294053	2.52826			Process
awake	66	P3	Soma	0.310317	2.12539			Models:
awake	66	P3	Process	0.564038	2.15841			meanDur.null: meanDur ~ (1 | animalname) + (1 | Spot)
awake	67	P3	Process	0.60826	2.26383			meanDur.model2: meanDur ~ Condition + (1 | animalname) + (1 | Spot)
awake	67	P3	Soma	0.414693	3.56718			Df AIC BIC logLik deviance Chisq Chi Df Pr(>Chisq)
awake	68	P3	Process	0.914993	2.55735			meanDur.null 4 305.71 318.68 -148.86 297.71
awake	68	P3	Soma	0.284225	2.89611			meanDur.model2 5 305.54 321.75 -147.77 295.54 2.174 1 0.1404
awake	69	P3	Process	0.664275	2.48303			Condition lsmean SE df lower.CL upper.CL
awake	69	P3	Soma	0.221313	2.99031			anesthetized 2.437751 0.05503718 178.51 2.329144 2.546358
awake	70	P3	Process	0.665534	4.21058			awake 2.622715 0.05405250 187.08 2.516051 2.729379
awake	70	P3	Soma	0.32099	2.1502			Degrees-of-freedom method: satterthwaite
awake	71	P3	Process	0.658319	2.48921			Confidence level used: 0.95
awake	71	P3	Soma	0.44769	2.40762			contrast estimate SE df t.ratio p.value
awake	72	P3	Process	0.538756	1.71104			anesthetized - awake -0.1849634 0.0771412 183.5 -2.398 0.0175
awake	72	P3	Soma	0.236619	3.81871
awake	73	P3	Process	0.971241	2.29339			Soma
awake	73	P3	Soma	0.310313	2.39537			Models:
awake	74	P3	Process	0.60671	3.44741			meanDur.null: meanDur ~ (1 | animalname) + (1 | Spot)
awake	74	P3	Soma	0.21272	3.40881			meanDur.model2: meanDur ~ Condition + (1 | animalname) + (1 | Spot)
awake	75	P3	Process	0.570986	2.55334			Df AIC BIC logLik deviance Chisq Chi Df Pr(>Chisq)
awake	75	P3	Soma	0.231502	1.97146			meanDur.null 4 351.57 364.54 -171.79 343.57
awake	76	P3	Soma	0.213273	2.51813			meanDur.model2 5 353.57 369.78 -171.79 343.57 2e-04 1 0.9896
awake	76	P3	Process	0.494001	3.01402			Condition lsmean SE df lower.CL upper.CL
awake	77	P3	Process	0.842549	2.36725			anesthetized 2.436107 0.06226770 189 2.313278 2.558936
awake	77	P3	Soma	0.349898	1.82631			awake 2.437241 0.06128704 189 2.316347 2.558136
awake	78	P3	Process	0.707834	2.20264			Degrees-of-freedom method: satterthwaite
awake	78	P3	Soma	0.257532	4.09488			Confidence level used: 0.95
awake	79	P3	Process	0.732605	2.70978			contrast estimate SE df t.ratio p.value
awake	79	P3	Soma	0.197421	2.44077			anesthetized - awake -0.001134069 0.08736915 189 -0.013 0.9897
awake	80	P3	Process	1.42703	2.03268
awake	80	P3	Soma	0.296825	1.799
awake	81	P3	Process	0.699339	3.078			anest._vs_exvivo
awake	81	P3	Soma	0.293906	1.79368			amplitude
awake	82	P3	Process	0.597227	2.03257			Process
awake	82	P3	Soma	0.212943	1.84314			Models:
awake	83	P3	Process	0.779173	2.25039			meanAmp.null: meanAmp ~ (1 | animalname) + (1 | Spot)
awake	83	P3	Soma	0.491639	2.24937			meanAmp.model2: meanAmp ~ Condition + (1 | animalname) + (1 | Spot)
awake	84	P3	Process	0.83989	2.34551			Df AIC BIC logLik deviance Chisq Chi Df Pr(>Chisq)
awake	84	P3	Soma	0.374091	2.48518			meanAmp.null 4 361.09 374.26 -176.54 353.09
awake	85	P3	Process	0.521114	3.76692			meanAmp.model2 5 338.83 355.29 -164.41 328.83 24.26 1 8.417e-07 ***
awake	85	P3	Soma	0.453341	1.68494			---
awake	86	P3	Process	0.429111	2.79947			Signif. codes: 0 ‘***’ 0.001 ‘**’ 0.01 ‘*’ 0.05 ‘.’ 0.1 ‘ ’ 1
awake	86	P3	Soma	0.200292	3.21459			Condition lsmean SE df lower.CL upper.CL
awake	87	P3	Process	0.678763	2.24107			ex_vivo 1.790774 0.05802741 69.53 1.675029 1.906520
awake	87	P3	Soma	0.32478	1.3936			in_vivo 1.273178 0.07173301 20.88 1.130094 1.416262
awake	88	P3	Process	0.532285	2.04133			Degrees-of-freedom method: satterthwaite
awake	88	P3	Soma	0.281243	1.82382			Confidence level used: 0.95
awake	89	P3	Process	0.483699	2.13468			contrast estimate SE df t.ratio p.value
awake	89	P3	Soma	0.246749	2.13465			ex_vivo - in_vivo 0.5175966 0.09226486 31.53 5.61 <.0001
awake	90	P3	Process	0.782334	3.21634
awake	90	P3	Soma	0.264352	3.22398			Soma
awake	91	P3	Process	0.452638	2.13483			Models:
awake	91	P3	Soma	0.286624	1.46663			meanAmp.null: meanAmp ~ (1 | animalname) + (1 | Spot)
awake	92	P3	Process	0.584668	2.40514			meanAmp.model2: meanAmp ~ Condition + (1 | animalname) + (1 | Spot)
awake	92	P3	Soma	0.221192	2.92702			Df AIC BIC logLik deviance Chisq Chi Df Pr(>Chisq)
awake	93	P3	Process	0.918333	2.85287			meanAmp.null 4 747.26 760.43 -369.63 739.26
awake	93	P3	Soma	0.253516	3.13257			meanAmp.model2 5 741.11 757.57 -365.55 731.11 8.1498 1 0.004307 **
awake	94	P3	Process	0.485059	2.5371			---
awake	94	P3	Soma	0.238314	2.77069			Signif. codes: 0 ‘***’ 0.001 ‘**’ 0.01 ‘*’ 0.05 ‘.’ 0.1 ‘ ’ 1
awake	95	P3	Process	0.764952	2.75261			Condition lsmean SE df lower.CL upper.CL
awake	95	P3	Soma	0.352188	1.77529			ex_vivo 1.807047 0.1536106 194.01 1.5040855 2.110008
awake	96	P3	Process	0.562329	2.14295			in_vivo 1.149129 0.1685412 193.78 0.8167203 1.481537
awake	96	P3	Soma	0.145362	2.80674			Degrees-of-freedom method: satterthwaite
ex_vivo	1	fN1244LL	Process	2.52643	1.85598			Confidence level used: 0.95
ex_vivo	1	fN1244LL	Soma	0.709573	2.6369			contrast estimate SE df t.ratio p.value
ex_vivo	2	fN1493R	Process	1.21634	2.1585			ex_vivo - in_vivo 0.657918 0.2280403 193.88 2.885 0.0044
ex_vivo	2	fN1493R	Soma	0.842049	1.94022
ex_vivo	3	fN1727L	Process	1.49053	1.77713			duration
ex_vivo	3	fN1727L	Soma	0.80279	1.58346			Process
ex_vivo	4	fN1727L	Process	1.72517	2.24535			Models:
ex_vivo	4	fN1727L	Soma	0.655924	2.14397			meanDur.null: meanDur ~ (1 | animalname) + (1 | Spot)
ex_vivo	5	fN1727L	Process	1.81188	2.39094			meanDur.model2: meanDur ~ Condition + (1 | animalname) + (1 | Spot)
ex_vivo	5	fN1727L	Soma	0.784267	2.09398			Df AIC BIC logLik deviance Chisq Chi Df Pr(>Chisq)
ex_vivo	6	fN1728R	Process	1.1912	2.48253			meanDur.null 4 242.56 255.74 -117.28 234.56
ex_vivo	6	fN1728R	Soma	0.86277	1.6539			meanDur.model2 5 236.72 253.19 -113.36 226.72 7.8432 1 0.005101 **
ex_vivo	7	fS02103R	Process	1.08613	2.87012			---
ex_vivo	7	fS02103R	Soma	0.333497	2.4686			Signif. codes: 0 ‘***’ 0.001 ‘**’ 0.01 ‘*’ 0.05 ‘.’ 0.1 ‘ ’ 1
ex_vivo	8	fS02103R	Process	1.50051	1.90673			Condition lsmean SE df lower.CL upper.CL
ex_vivo	8	fS02103R	Soma	2.86869	2.00948			ex_vivo 2.243778 0.04819659 86.49 2.147974 2.339581
ex_vivo	9	fS02094R	Process	2.09394	2.25358			in_vivo 2.469527 0.06284796 49.90 2.344599 2.594454
ex_vivo	9	fS02094R	Soma	3.32885	1.50698			Degrees-of-freedom method: satterthwaite
ex_vivo	10	fS02094R	Process	1.33294	2.42963			Confidence level used: 0.95
ex_vivo	10	fS02094R	Soma	1.14996	2.52748			contrast estimate SE df t.ratio p.value
ex_vivo	11	fS02094R	Process	1.02546	2.02683			ex_vivo - in_vivo -0.2257494 0.07920086 60.67 -2.85 0.0060
ex_vivo	11	fS02094R	Soma	0.854443	1.87927
ex_vivo	12	fS02093L	Process	0.725641	1.82874			Soma
ex_vivo	12	fS02093L	Soma	0.483319	1.53642			Models:
ex_vivo	13	fS02093L	Process	0.709581	2.45186			meanDur.null: meanDur ~ (1 | animalname) + (1 | Spot)
ex_vivo	13	fS02093L	Soma	0.495272	1.83318			meanDur.model2: meanDur ~ Condition + (1 | animalname) + (1 | Spot)
ex_vivo	14	fS02093L	Process	1.60929	2.09863			Df AIC BIC logLik deviance Chisq Chi Df Pr(>Chisq)
ex_vivo	15	fS02093L	Soma	0.598227	1.72405			meanDur.null 4 335.43 348.61 -163.72 327.43
ex_vivo	14	fS02093L	Process	1.71273	2.46806			meanDur.model2 5 314.67 331.14 -152.34 304.67 22.761 1 1.835e-06 ***
ex_vivo	15	fS02093L	Soma	0.259602	2.40841			---
ex_vivo	16	fS02093L	Process	1.65124	2.67344			Signif. codes: 0 ‘***’ 0.001 ‘**’ 0.01 ‘*’ 0.05 ‘.’ 0.1 ‘ ’ 1
ex_vivo	16	fS02093L	Soma	0.724514	3.12046			Condition lsmean SE df lower.CL upper.CL
ex_vivo	17	fS02093L	Process	3.47899	1.83621			ex_vivo 2.066154 0.05059099 197.79 1.966387 2.165921
ex_vivo	17	fS02093L	Soma	3.31483	2.93501			in_vivo 2.433449 0.05469097 172.73 2.325597 2.541302
ex_vivo	18	fS02084R	Process	1.40597	2.07579			Degrees-of-freedom method: satterthwaite
ex_vivo	18	fS02084R	Soma	0.321173	1.41992			Confidence level used: 0.95
ex_vivo	19	fS02628LL	Process	1.98582	2.21904			contrast estimate SE df t.ratio p.value
ex_vivo	19	fS02628LL	Soma	0.762511	2.89857			ex_vivo - in_vivo -0.3672956 0.07450202 187.62 -4.93 <.0001
ex_vivo	20	fS02626R	Process	0.616842	2.79547
ex_vivo	20	fS02626R	Soma	0.4843	1.82913
ex_vivo	21	fS02626R	Process	2.36511	2.39288
ex_vivo	21	fS02626R	Soma	1.3551	1.65093
ex_vivo	22	fS02626R	Process	1.22962	3.1028
ex_vivo	22	fS02626R	Soma	0.686032	2.11539
ex_vivo	23	fS02208L	Process	2.62568	2.38799
ex_vivo	23	fS02208L	Soma	0.936857	1.59973
ex_vivo	24	mSM1853L	Process	2.05097	3.47884
ex_vivo	24	mSM1853L	Soma	3.1453	1.83328
ex_vivo	25	mS03655RR	Process	0.916088	2.71472
ex_vivo	25	mS03655RR	Soma	0.548312	1.74457
ex_vivo	26	mS03655RR	Process	2.40507	1.88295
ex_vivo	26	mS03655RR	Soma	1.17851	2.14115
ex_vivo	27	mS03655RR	Process	2.27416	1.97356
ex_vivo	27	mS03655RR	Soma	3.70944	1.92693
ex_vivo	28	mS03655RR	Process	1.54374	1.66758
ex_vivo	28	mS03655RR	Soma	0.536318	2.40763
ex_vivo	29	mS03007R	Process	2.72327	2.4652
ex_vivo	29	mS03007R	Soma	2.09658	2.60304
ex_vivo	30	fS03648L	Process	2.20557	1.70652
ex_vivo	30	fS03648L	Soma	0.785695	2.26501
ex_vivo	31	fS03648L	Process	1.09444	2.6581
ex_vivo	31	fS03648L	Soma	1.34135	2.01095
ex_vivo	32	mSO4185L	Process	1.11549	2.12801
ex_vivo	32	mSO4185L	Soma	0.758138	1.64483
ex_vivo	33	mSO4185L	Process	2.91211	2.07829
ex_vivo	33	mSO4185L	Soma	1.50332	4.81762
ex_vivo	34	mS05094R	Process	1.92155	2.08901
ex_vivo	34	mS05094R	Soma	0.522935	2.1297
ex_vivo	35	mS05794R	Process	0.732977	2.32191
ex_vivo	35	mS05794R	Soma	0.305645	1.64242
ex_vivo	36	mS05794R	Process	2.431	1.69991
ex_vivo	36	mS05794R	Soma	1.02687	1.58151
ex_vivo	37	mS05793L	Process	1.8962	2.00376
ex_vivo	37	mS05793L	Soma	2.38377	1.89054
ex_vivo	38	mS03004L	Process	2.43522	1.90749
ex_vivo	38	mS03004L	Soma	1.22972	1.93016
ex_vivo	39	mS03004L	Process	1.72235	2.12732
ex_vivo	39	mS03004L	Soma	1.16392	1.74642
ex_vivo	40	mS03004L	Process	2.37924	1.85206
ex_vivo	40	mS03004L	Soma	4.21213	1.62297
ex_vivo	41	mS03005R	Process	2.40842	2.1247
ex_vivo	41	mS03005R	Soma	0.394702	2.7649
ex_vivo	42	mS03005R	Process	2.96367	2.27313
ex_vivo	42	mS03005R	Soma	1.71566	1.88704
ex_vivo	43	mS03005R	Process	3.16737	1.57189
ex_vivo	43	mS03005R	Soma	10.4584	1.4302
ex_vivo	44	fS04244L	Process	1.74864	2.15618
ex_vivo	44	fS04244L	Soma	3.30205	2.09855
ex_vivo	45	fS04244L	Process	2.09292	1.69242
ex_vivo	45	fS04244L	Soma	0.586053	2.16779
ex_vivo	46	fS04244L	Process	1.06394	2.67819
ex_vivo	46	fS04244L	Soma	0.640398	1.97492
ex_vivo	47	fS04244L	Process	1.03407	2.97644
ex_vivo	47	fS04244L	Soma	0.438206	2.54855
ex_vivo	48	fS05316LRR	Process	1.71837	1.82104
ex_vivo	48	fS05316LRR	Soma	0.905521	3.32156
ex_vivo	49	fS05316LRR	Process	2.21569	2.04755
ex_vivo	49	fS05316LRR	Soma	1.922	1.63357
ex_vivo	50	fS03691LR	Process	1.8439	2.39379
ex_vivo	50	fS03691LR	Soma	8.47179	2.39089
ex_vivo	51	fS03691LR	Process	1.38467	1.7176
ex_vivo	51	fS03691LR	Soma	1.71734	1.7445
ex_vivo	52	fS07018R	Process	2.60882	2.29783
ex_vivo	52	fS07018R	Soma	7.68429	1.94551
ex_vivo	53	fS07018R	Process	2.28018	1.76737
ex_vivo	53	fS07018R	Soma	1.66661	1.78604
ex_vivo	54	mS06657LR	Process	2.38615	1.92322
ex_vivo	54	mS06657LR	Soma	3.39537	1.78708
ex_vivo	55	mS06657LR	Process	1.83444	1.67718
ex_vivo	55	mS06657LR	Soma	1.46486	2.22043
ex_vivo	56	fS07146R	Process	1.90112	2.2764
ex_vivo	56	fS07146R	Soma	0.779958	1.61215
ex_vivo	57	fS07146R	Process	3.06124	1.92771
ex_vivo	57	fS07146R	Soma	4.96058	2.48763
ex_vivo	58	fS07146R	Process	2.58328	1.7387
ex_vivo	58	fS07146R	Soma	4.12359	3.01663
ex_vivo	59	fS07146R	Process	2.5442	2.36652
ex_vivo	59	fS07146R	Soma	2.58809	2.01955
ex_vivo	60	fS07146R	Process	1.90192	2.35491
ex_vivo	60	fS07146R	Soma	0.957753	2.27669
ex_vivo	61	fS07147LR	Process	0.854232	3.60301
ex_vivo	61	fS07147LR	Soma	0.552033	2.00589
ex_vivo	62	fS07147LR	Process	1.09657	2.60106
ex_vivo	62	fS07147LR	Soma	0.460689	2.56077
ex_vivo	63	fSO8215L	Process	1.40355	3.45474
ex_vivo	63	fSO8215L	Soma	1.19343	2.38564
ex_vivo	64	fSO8215L	Process	1.31389	2.12053
ex_vivo	64	fSO8215L	Soma	1.28507	2.33158
ex_vivo	65	mSP45329LR	Process	1.26112	2.63884
ex_vivo	65	mSP45329LR	Soma	0.731026	2.3293
ex_vivo	66	fSJ6807R	Process	1.53768	2.12789
ex_vivo	66	fSJ6807R	Soma	3.39011	1.88844
ex_vivo	67	fSJ6807R	Process	0.613241	2.86996
ex_vivo	67	fSJ6807R	Soma	0.634203	2.72542
ex_vivo	68	mSJ6804LL	Process	3.21682	2.71668
ex_vivo	68	mSJ6804LL	Soma	1.63225	2.25592
ex_vivo	69	mSJ6804LL	Process	1.54186	2.71767
ex_vivo	69	mSJ6804LL	Soma	2.87263	2.08078
ex_vivo	70	fSL3746L	Process	1.31549	2.50467
ex_vivo	70	fSL3746L	Soma	0.590315	1.3964
ex_vivo	71	fSO7017L	Process	2.70073	1.85113
ex_vivo	71	fSO7017L	Soma	2.50828	1.73409
ex_vivo	72	fSO7017L	Process	2.35113	1.81292
ex_vivo	72	fSO7017L	Soma	8.6912	1.71799
ex_vivo	73	fSO7736L	Process	1.0011	2.2382
ex_vivo	73	fSO7736L	Soma	0.440926	2.03722
ex_vivo	74	fSO7736L	Process	1.24698	2.11122
ex_vivo	74	fSO7736L	Soma	0.785867	2.22289
ex_vivo	75	female	Process	2.09586	2.25594
ex_vivo	75	female	Soma	1.93309	2.23859
ex_vivo	76	fSO352R	Process	0.951424	2.0143
ex_vivo	76	fSO352R	Soma	0.824466	1.25024
ex_vivo	77	fSO352R	Process	1.34868	2.49388
ex_vivo	77	fSO352R	Soma	0.80162	1.66847
ex_vivo	78	fSO352R	Process	1.76906	2.22931
ex_vivo	78	fSO352R	Soma	0.926462	1.96641
ex_vivo	79	mSO9417L	Process	1.42175	1.85862
ex_vivo	79	mSO9417L	Soma	1.05195	1.94169
ex_vivo	80	mSO9417L	Process	1.19801	2.68347
ex_vivo	80	mSO9417L	Soma	3.75538	1.74731
ex_vivo	81	mSO9418R	Process	1.25238	2.52459
ex_vivo	81	mSO9418R	Soma	0.779678	1.80546
ex_vivo	82	fSO1245L	Process	1.90819	2.17435
ex_vivo	82	fSO1245L	Soma	1.28405	2.20955
ex_vivo	83	fSO1251R	Process	1.22253	1.8094
ex_vivo	83	fSO1251R	Soma	1.62054	1.62669
ex_vivo	84	fSO1251R	Process	1.83755	2.09597
ex_vivo	84	fSO1251R	Soma	2.14821	1.72239
ex_vivo	85	fSL3749LL	Process	1.6124	1.95562
ex_vivo	85	fSL3749LL	Soma	1.54441	1.93009
ex_vivo	86	fSO5788L	Process	1.14527	1.99755
ex_vivo	86	fSO5788L	Soma	1.56792	1.55839
ex_vivo	87	fSO5788L	Process	1.72559	2.02927
ex_vivo	87	fSO5788L	Soma	0.969817	2.27804
ex_vivo	88	fSM1954L	Process	3.12121	1.98239
ex_vivo	88	fSM1954L	Soma	1.28068	2.16882
ex_vivo	89	mSL5591RR	Process	1.25722	2.25485
ex_vivo	89	mSL5591RR	Soma	0.414414	2.61957
ex_vivo	90	mSL5591RR	Process	1.26263	1.55176
ex_vivo	90	mSL5591RR	Soma	0.758648	1.44358
ex_vivo	91	mSL5591RR	Process	2.31631	2.92389
ex_vivo	91	mSL5591RR	Soma	3.84204	2.11917
ex_vivo	92	mSL5508R	Process	2.69768	1.7358
ex_vivo	92	mSL5508R	Soma	5.35059	2.30913
ex_vivo	93	mSL5508R	Process	0.668541	3.01192
ex_vivo	93	mSL5508R	Soma	0.601603	2.86049
ex_vivo	94	mSL5508R	Process	1.96612	2.48006
ex_vivo	94	mSL5508R	Soma	0.333074	2.32953
ex_vivo	95	mSL5619R	Process	3.49414	2.05198
ex_vivo	95	mSL5619R	Soma	2.62387	2.41255
ex_vivo	96	mSL5895L	Process	2.01952	1.9069
ex_vivo	96	mSL5895L	Soma	3.22667	1.65843
ex_vivo	97	mSL5895L	Process	1.73609	3.77884
ex_vivo	97	mSL5895L	Soma	1.69604	1.77475
ex_vivo	98	mSL5895L	Process	1.63844	2.36528
ex_vivo	98	mSL5895L	Soma	1.00262	2.05701
ex_vivo	99	mSL5896R	Process	1.97023	2.04667
ex_vivo	99	mSL5896R	Soma	2.49557	1.81551
ex_vivo	100	mSL5896R	Process	0.983903	2.74879
ex_vivo	100	mSL5896R	Soma	1.28395	1.67516
ex_vivo	101	mSL5896R	Process	1.57873	2.30484
ex_vivo	101	mSL5896R	Soma	1.83278	1.95806
ex_vivo	102	fSL6897R	Process	2.50376	1.87032
ex_vivo	102	fSL6897R	Soma	3.32317	2.19048
ex_vivo	103	fSL6897R	Process	1.01367	2.40152
ex_vivo	103	fSL6897R	Soma	1.48185	2.26215
ex_vivo	104	fSL6897R	Process	2.34898	2.05206
ex_vivo	104	fSL6897R	Soma	3.13727	1.82845
ex_vivo	105	fSL7056R	Process	1.97983	1.77247
ex_vivo	105	fSL7056R	Soma	1.37707	2.04591
ex_vivo	106	mSJ6802R	Process	1.60959	1.7693
ex_vivo	106	mSJ6802R	Soma	2.27373	1.29954
anesthetized	1	younger male	Process	1.18511	2.48015
anesthetized	1	younger male	Soma	0.995871	3.58874
anesthetized	2	young_female	Process	1.5421	1.86907
anesthetized	2	young_female	Soma	2.5249	2.45359
anesthetized	3	younger male	Process	1.02684	2.66304
anesthetized	3	younger male	Soma	2.01281	2.73823
anesthetized	4	female young	Process	0.957866	2.73765
anesthetized	4	female young	Soma	0.458126	2.66475
anesthetized	5	female young	Process	0.645943	2.86131
anesthetized	5	female young	Soma	0.486518	2.13691
anesthetized	6	female young	Process	1.14583	2.18807
anesthetized	6	female young	Soma	0.498655	2.08344
anesthetized	7	female young	Process	0.9422	1.85136
anesthetized	7	female young	Soma	3.48927	1.56163
anesthetized	8	female young	Process	1.54167	1.87218
anesthetized	8	female young	Soma	0.760255	2.53435
anesthetized	9	female young	Process	0.845555	2.51935
anesthetized	9	female young	Soma	1.11033	2.61382
anesthetized	10	female young	Process	1.13209	2.34609
anesthetized	10	female young	Soma	0.467761	1.77278
anesthetized	11	female young	Process	1.2218	2.36254
anesthetized	11	female young	Soma	0.656634	1.91417
anesthetized	12	female young	Process	1.07553	2.37604
anesthetized	12	female young	Soma	0.849727	2.17156
anesthetized	13	female young	Process	1.35151	2.28632
anesthetized	13	female young	Soma	1.23069	1.6903
anesthetized	14	female young	Process	1.86754	2.23506
anesthetized	14	female young	Soma	1.67408	2.25119
anesthetized	15	female young	Process	0.883012	2.8002
anesthetized	15	female young	Soma	0.895653	1.81876
anesthetized	16	female young	Process	1.22132	2.42687
anesthetized	16	female young	Soma	0.449519	3.65589
anesthetized	17	female young	Process	1.42531	2.02046
anesthetized	17	female young	Soma	0.593864	2.39075
anesthetized	18	mN1246L	Process	1.33073	2.30418
anesthetized	18	mN1246L	Soma	0.38797	1.8449
anesthetized	19	mN1246L	Process	1.63017	3.39308
anesthetized	19	mN1246L	Soma	0.652503	1.99166
anesthetized	20	mN1246L	Process	1.53992	2.96552
anesthetized	20	mN1246L	Soma	0.708363	3.05903
anesthetized	21	mN1246L	Process	1.23695	2.44603
anesthetized	21	mN1246L	Soma	0.64539	1.43323
anesthetized	22	mN1246L	Process	1.65308	2.67822
anesthetized	22	mN1246L	Soma	2.84288	2.09708
anesthetized	23	mN1246L	Process	1.80182	2.32407
anesthetized	23	mN1246L	Soma	0.424512	2.58846
anesthetized	24	mN1246L	Process	1.13122	2.35383
anesthetized	24	mN1246L	Soma	0.7295	2.41022
anesthetized	25	mN1246L	Process	1.6717	1.92427
anesthetized	25	mN1246L	Soma	1.20356	1.91047
anesthetized	26	fN0690L	Process	2.28474	1.98433
anesthetized	26	fN0690L	Soma	0.818639	4.99993
anesthetized	27	fN0690L	Process	1.3799	2.54016
anesthetized	27	fN0690L	Soma	6.11293	2.24429
anesthetized	28	mN1246L	Process	1.59001	2.35077
anesthetized	28	mN1246L	Soma	0.67	2.50586
anesthetized	29	mN1246L	Process	1.89446	2.45665
anesthetized	29	mN1246L	Soma	0.97475	2.26913
anesthetized	30	mN1246L	Process	1.64264	2.72631
anesthetized	30	mN1246L	Soma	0.803113	2.32758
anesthetized	31	mN1246L	Process	1.27631	2.10867
anesthetized	31	mN1246L	Soma	0.673148	2.90223
anesthetized	32	mN1246L	Process	0.834881	2.86146
anesthetized	32	mN1246L	Soma	0.326319	2.11298
anesthetized	33	mN1246L	Process	1.20244	2.25756
anesthetized	33	mN1246L	Soma	0.536607	1.608
anesthetized	34	mN1247R	Process	1.01103	2.58752
anesthetized	34	mN1247R	Soma	0.511785	2.69224
anesthetized	35	mN1247R	Process	1.51859	2.51955
anesthetized	35	mN1247R	Soma	1.02453	2.15207
anesthetized	36	mN1247R	Process	0.872568	2.14239
anesthetized	36	mN1247R	Soma	0.553455	2.35743
anesthetized	37	mN1246L	Process	0.864419	2.37384
anesthetized	37	mN1246L	Soma	0.791303	3.2465
anesthetized	38	mN1246L	Process	1.13161	2.13556
anesthetized	38	mN1246L	Soma	0.827385	2.96765
anesthetized	39	mN1246L	Process	1.47157	2.43709
anesthetized	39	mN1246L	Soma	1.05669	2.89976
anesthetized	40	mN1246L	Process	1.20253	2.24095
anesthetized	40	mN1246L	Soma	0.470004	2.14974
anesthetized	41	mN1246L	Process	1.11332	2.66805
anesthetized	41	mN1246L	Soma	0.474131	2.77532
anesthetized	42	mS02091LL	Process	1.42507	2.33344
anesthetized	42	mS02091LL	Soma	3.10734	2.19653
anesthetized	43	mS02091LL	Process	0.933169	2.6679
anesthetized	43	mS02091LL	Soma	0.48756	2.16054
anesthetized	44	mS02090LR	Process	0.949685	2.86513
anesthetized	44	mS02090LR	Soma	0.422139	2.86732
anesthetized	45	mS02090LR	Process	1.09074	3.0173
anesthetized	45	mS02090LR	Soma	2.8439	1.90332
anesthetized	46	mS02090LR	Process	1.32024	3.29246
anesthetized	46	mS02090LR	Soma	3.76174	2.23994
anesthetized	47	mS02090LR	Process	0.888084	2.67778
anesthetized	47	mS02090LR	Soma	0.535473	2.17029
anesthetized	48	fSO4193R	Process	0.87751	3.2014
anesthetized	48	fSO4235LL	Process	0.953662	2.0763
anesthetized	49	fSO4193R	Soma	0.477739	2.84796
anesthetized	49	fSO4235LL	Soma	0.699372	2.37365
anesthetized	50	fSO4193R	Process	1.43709	2.88994
anesthetized	50	fSO4235LL	Process	1.28228	2.44737
anesthetized	51	fSO4193R	Soma	0.892651	3.34108
anesthetized	51	fSO4235LL	Soma	1.28158	2.35813
anesthetized	52	fSO4193R	Process	1.54248	2.09212
anesthetized	52	fSO4235LL	Process	1.18487	2.33028
anesthetized	53	fSO4193R	Soma	1.03676	1.88668
anesthetized	53	fSO4235LL	Soma	0.832787	2.29465
anesthetized	54	female 6LL	Process	0.774469	3.36301
anesthetized	54	female 6LL	Soma	0.648814	2.89633
anesthetized	55	fSO9485LR	Process	1.11741	1.79877
anesthetized	55	fSO9485LR	Soma	1.77158	1.74639
anesthetized	56	female 6LR	Process	1.31027	2.20002
anesthetized	56	female 6LR	Soma	0.411419	2.47241
anesthetized	57	fSO9485LR	Process	1.21234	1.81242
anesthetized	57	fSO9485LR	Soma	0.558025	2.06845
anesthetized	58	fSO8970L	Process	1.34905	2.05686
anesthetized	58	fSO8970L	Soma	1.38347	2.30787
anesthetized	59	fSO9485LR	Process	1.17614	1.93176
anesthetized	59	fSO9485LR	Soma	0.78164	1.73393
anesthetized	60	fSO9485LR	Process	1.59408	2.29709
anesthetized	60	fSO9485LR	Soma	0.705634	2.30943
anesthetized	61	fSO9485LR	Process	2.13277	1.74577
anesthetized	61	fSO9485LR	Soma	1.3248	1.939
anesthetized	62	female 6LR	Process	2.86533	2.35873
anesthetized	62	female 6LR	Soma	6.06262	2.03756
anesthetized	63	female 6LR	Process	1.89723	2.2296
anesthetized	63	female 6LR	Soma	0.831921	2.32066
anesthetized	64	fSO8970L	Process	1.25167	2.17603
anesthetized	64	fSO8970L	Soma	1.29406	2.15039
anesthetized	65	fSO4235LL	Process	1.00415	2.68159
anesthetized	65	fSO4235LL	Soma	1.29307	2.16392
anesthetized	66	fSO4235LL	Process	0.995904	2.20343
anesthetized	66	fSO4235LL	Soma	0.558859	3.13256
anesthetized	67	fSO8970L	Process	1.24862	2.07084
anesthetized	67	fSO8970L	Soma	0.660318	2.22925
anesthetized	68	fSO9485LR	Process	1.52328	1.75251
anesthetized	68	fSO9485LR	Soma	1.00041	2.79694
anesthetized	69	fSO9485LR	Process	1.61618	1.6917
anesthetized	69	fSO9485LR	Soma	0.73355	3.04714
anesthetized	70	fSO9485LR	Process	0.85143	2.27319
anesthetized	70	fSO9485LR	Soma	0.449774	2.17896
anesthetized	71	fSM1956LR	Process	2.24872	2.90755
anesthetized	71	fSM1956LR	Soma	8.14111	2.06672
anesthetized	72	fSM1955R	Process	0.759279	3.55206
anesthetized	72	fSM1955R	Soma	0.503024	2.75422
anesthetized	73	fSL5614L	Process	1.51955	2.84436
anesthetized	73	fSL5614L	Soma	0.961133	1.89735
anesthetized	74	fSL5614L	Process	0.62769	2.54107
anesthetized	74	fSL5614L	Soma	0.866817	1.99646
anesthetized	75	fSM1956LR	Process	0.947209	1.69314
anesthetized	75	fSM1956LR	Soma	0.9687	2.53653
anesthetized	76	fSL5884L	Process	0.514168	3.42531
anesthetized	76	mSL5879R	Process	0.84038	3.26936
anesthetized	77	fSL5884L	Soma	0.57402	2.17614
anesthetized	77	mSL5879R	Soma	0.248993	2.2097
anesthetized	78	mSL5879R	Process	1.64389	3.12679
anesthetized	78	mSL5879R	Soma	1.01682	2.35365
anesthetized	79	mSL5880LR	Process	1.45527	1.94277
anesthetized	79	mSL5880LR	Soma	0.510673	2.76644
anesthetized	80	fSM1956LR	Process	0.996938	2.15558
anesthetized	80	fSM1956LR	Soma	0.918467	1.90999
anesthetized	81	fSM1956LR	Process	1.09178	1.86755
anesthetized	81	fSM1956LR	Soma	2.0296	1.67332
anesthetized	82	fSM1955R	Process	1.34209	2.47023
anesthetized	82	fSM1956LR	Process	0.951043	2.0272
anesthetized	83	fSM1955R	Soma	0.746109	3.22854
anesthetized	83	fSM1956LR	Soma	0.351281	2.69397
anesthetized	84	mSL5879R	Process	1.01781	3.11979
anesthetized	84	mSL5879R	Soma	0.601255	2.88743
anesthetized	85	mSL5879R	Process	1.05192	3.03059
anesthetized	85	mSL5879R	Soma	0.422374	2.45951
anesthetized	86	fSL5884L	Process	0.433367	2.62212
anesthetized	86	fSL5884L	Soma	0.181177	3.13259
anesthetized	87	fSL5884L	Process	1.89503	2.00999
anesthetized	87	fSL5884L	Soma	1.30282	2.5014
anesthetized	88	fSL5884L	Process	1.25774	2.29281
anesthetized	88	fSL5884L	Soma	0.225254	3.26727
anesthetized	89	fSP6953LR	Process	1.09325	3.13855
anesthetized	89	fSP6953LR	Soma	0.565223	3.07811
anesthetized	90	fSL7168LR	Process	1.20491	2.58463
anesthetized	90	fSL7168LR	Soma	0.850146	2.69941
anesthetized	91	mSP8227L	Process	1.08803	2.61865
anesthetized	91	mSP8227L	Soma	0.850146	2.69941
anesthetized	92	fSL9054R	Process	0.967028	2.14465
anesthetized	92	fSL9054R	Soma	1.22432	2.10727
anesthetized	93	fSP8231L	Process	1.80537	2.23747
anesthetized	93	fSP8231L	Soma	0.433669	3.70461
