# Supplementary material for: Distinct signatures of calcium activity in brain mural cells
Source: eLife. 2021 Jul 6;10:e70591. doi: 10.7554/eLife.70591 (PMC8294852; doi:10.7554/eLife.70591)
Supplement: Figure 3—figure supplement 3—source data 1. [file elife-70591-fig3-figsupp3-data1.xlsx]

## Sheet: fig3-fig-suppl.2
raw data figure 3 figure supplement 2
Condition	Spot	animalname	ROIType	meanAmp	meanDur	freq			frequency
venular_invivo	1	fSO8970L	Process	1.39082	2.04653	54			Process
venular_invivo	1	fSO8970L	Soma	1.36464	2.30588	8.66667			Models:
venular_invivo	2	fSO8970L	Process	1.08583	2.42063	101.333			freq.null: freq ~ (1 | animalname)
venular_invivo	2	fSO8970L	Soma	0.777373	2.07968	7.33333			freq.model2: freq ~ Condition + (1 | animalname)
venular_invivo	3	mSL5879R	Process	0.997887	2.1011	30			Df AIC BIC logLik deviance Chisq Chi Df Pr(>Chisq)
venular_invivo	3	mSL5879R	Soma	0.486907	1.92404	8.66667			freq.null 3 184.98 187.97 -89.490 178.98
venular_invivo	4	mSL5879R	Process	0.642766	2.10339	16.6667			freq.model2 4 185.45 189.44 -88.727 177.45 1.5265 1 0.2166
venular_invivo	4	mSL5879R	Soma	0.395063	2.167	8			Condition lsmean SE df lower.CL upper.CL
venular_invivo	5	fSL7168LR	Process	0.596009	3.11817	28			venular_exvivo 33.14872 7.350886 8.33 16.31318 49.98427
venular_invivo	5	fSL7168LR	Soma	0.549327	2.61597	8.66667			venular_invivo 47.96425 9.148506 5.14 27.01167 68.91684
venular_invivo	6	fSL7168LR	Process	1.45172	2.26732	27.3333			Degrees-of-freedom method: satterthwaite
venular_invivo	6	fSL7168LR	Soma	0.701882	2.06789	6.66667			Confidence level used: 0.95
venular_invivo	7	fSL7168LR	Process	2.51339	2.05806	49.3333			contrast estimate SE df t.ratio p.value
venular_invivo	7	fSL7168LR	Soma	4.26496	1.82555	9.33333			venular_exvivo - venular_invivo -14.81553 11.73587 6.17 -1.262 0.2524
venular_invivo	8	fSL7168LR	Process	1.13347	2.79078	46.6667			Soma
venular_invivo	8	fSL7168LR	Soma	0.782852	1.73246	7.33333			Models:
venular_invivo	9	fSL7168LR	Process	2.32148	2.15798	71.3333			freq.null: freq ~ (1 | animalname)
venular_invivo	9	fSL7168LR	Soma	0.753372	1.75545	9.33333			freq.model2: freq ~ Condition + (1 | animalname)
venular_exvivo	1	fSO0341R	Process	2.2901	2.7759	27.3333			Df AIC BIC logLik deviance Chisq Chi Df Pr(>Chisq)
venular_exvivo	1	fSO0341R	Soma	1.48873	1.84885	3.33333			freq.null 3 95.509 98.497 -44.755 89.509
venular_exvivo	2	mSP6965R	Process	1.42463	3.31614	3.33333			freq.model2 4 97.509 101.492 -44.755 89.509 0 1 0.998
venular_exvivo	2	mSP6965R	Soma	1.4289	2.55985	6			Condition lsmean SE df lower.CL upper.CL
venular_exvivo	3	mSP6957L	Process	2.15857	1.74775	62			venular_exvivo 8.206029 0.8139887 5.86 6.202261 10.20980
venular_exvivo	3	mSP6957L	Soma	1.69887	1.44693	7.33333			venular_invivo 8.209255 1.0121439 3.33 5.717696 10.70082
venular_exvivo	4	mSP6957L	Process	2.02611	2.1144	21.3333			Degrees-of-freedom method: satterthwaite
venular_exvivo	4	mSP6957L	Soma	1.36509	2.43679	6			Confidence level used: 0.95
venular_exvivo	5	mSP6957L	Process	1.41683	2.71464	47.3333			contrast estimate SE df t.ratio p.value
venular_exvivo	5	mSP6957L	Soma	0.587366	2.63437	7.33333			venular_exvivo - venular_invivo -0.00322629 1.298851 4.1 -0.002 0.9981
venular_exvivo	6	fSL7903LR	Process	1.72628	2.56885	28.6667
venular_exvivo	6	fSL7903LR	Soma	0.323133	2.23613	10
venular_exvivo	7	fSL7903LR	Process	2.51472	2.12239	26			amplitude
venular_exvivo	7	fSL7903LR	Soma	10.7121	2.20658	7.33333			Process
venular_exvivo	8	fSL7947R	Process	2.12309	1.76891	48.6667			Models:
venular_exvivo	8	fSL7947R	Soma	0.874632	1.71563	14.6667			meanAmp.null: meanAmp ~ (1 | animalname)
venular_exvivo	9	fSL7947R	Process	1.24427	2.18877	52			meanAmp.model2: meanAmp ~ Condition + (1 | animalname)
venular_exvivo	9	fSL7947R	Soma	0.395401	1.88477	10			Df AIC BIC logLik deviance Chisq Chi Df Pr(>Chisq)
venular_exvivo	10	fSL7947R	Process	1.11938	2.47635	51.3333			meanAmp.null 3 42.714 45.701 -18.357 36.714
venular_exvivo	10	fSL7947R	Soma	0.983235	1.46009	8			meanAmp.model2 4 42.863 46.845 -17.431 34.863 1.8518 1 0.1736
venular_exvivo	11	mSL9195L	Process	0.769453	2.88707	25.3333			Condition lsmean SE df lower.CL upper.CL
venular_exvivo	11	mSL9195L	Soma	0.647783	1.50603	12			venular_exvivo 1.710310 0.1744140 20 1.3464893 2.074132
									venular_invivo 1.348153 0.1928219 20 0.9459333 1.750372
									Degrees-of-freedom method: satterthwaite
									Confidence level used: 0.95
									contrast estimate SE df t.ratio p.value
									venular_exvivo - venular_invivo 0.3621577 0.260001 20 1.393 0.1789
									Soma
									Models:
									meanAmp.null: meanAmp ~ (1 | animalname)
									meanAmp.model2: meanAmp ~ Condition + (1 | animalname)
									Df AIC BIC logLik deviance Chisq Chi Df Pr(>Chisq)
									meanAmp.null 3 95.494 98.481 -44.747 89.494
									meanAmp.model2 4 96.953 100.936 -44.476 88.953 0.5412 1 0.4619
									Condition lsmean SE df lower.CL upper.CL
									venular_exvivo 1.864109 0.6743076 20 0.457528 3.270690
									venular_invivo 1.119597 0.7454751 20 -0.435437 2.674631
									Degrees-of-freedom method: satterthwaite
									Confidence level used: 0.95
									contrast estimate SE df t.ratio p.value
									venular_exvivo - venular_invivo 0.7445122 1.005198 20 0.741 0.4675
									duration
									Process
									Models:
									meanDur.null: meanDur ~ (1 | animalname)
									meanDur.model2: meanDur ~ Condition + (1 | animalname)
									Df AIC BIC logLik deviance Chisq Chi Df Pr(>Chisq)
									meanDur.null 3 28.121 31.108 -11.060 22.121
									meanDur.model2 4 29.917 33.900 -10.959 21.917 0.2037 1 0.6517
									Condition lsmean SE df lower.CL upper.CL
									venular_exvivo 2.425561 0.1261905 20 2.162332 2.68879
									venular_invivo 2.340440 0.1395088 20 2.049430 2.63145
									Degrees-of-freedom method: satterthwaite
									Confidence level used: 0.95
									contrast estimate SE df t.ratio p.value
									venular_exvivo - venular_invivo 0.08512125 0.1881137 20 0.452 0.6558
									Soma
									Models:
									meanDur.null: meanDur ~ (1 | animalname)
									meanDur.model2: meanDur ~ Condition + (1 | animalname)
									Df AIC BIC logLik deviance Chisq Chi Df Pr(>Chisq)
									meanDur.null 3 22.217 25.204 -8.1083 16.217
									meanDur.model2 4 24.088 28.071 -8.0439 16.088 0.1289 1 0.7196
									Condition lsmean SE df lower.CL upper.CL
									venular_exvivo 1.994183 0.1090779 20 1.766651 2.221716
									venular_invivo 2.052657 0.1205901 20 1.801110 2.304204
									Degrees-of-freedom method: satterthwaite
									Confidence level used: 0.95
									contrast estimate SE df t.ratio p.value
									venular_exvivo - venular_invivo -0.05847381 0.1626037 20 -0.36 0.7229
