# Supplementary material for: Distinct signatures of calcium activity in brain mural cells
Source: eLife. 2021 Jul 6;10:e70591. doi: 10.7554/eLife.70591 (PMC8294852; doi:10.7554/eLife.70591)
Supplement: Figure 3—source data 1. [file elife-70591-fig3-data1.xlsx]

## Sheet: 3B
								frequency
								awake_vs_exvivo
								Process
Condition	Spot	animalname	ROIType	freq				Models:
awake	1	P2	Soma	9.33333				freq.null: freq ~ (1 | animalname) + (1 | Spot)
awake	1	P2	Process	41.3333				freq.model2: freq ~ Condition + (1 | animalname) + (1 | Spot)
awake	2	P1	Process	28				Df AIC BIC logLik deviance Chisq Chi Df Pr(>Chisq)
awake	3	P2	Process	29.3333				freq.null 4 1733.3 1746.5 -862.66 1725.3
awake	2	P1	Soma	8				freq.model2 5 1732.2 1748.8 -861.11 1722.2 3.0972 1 0.07843 .
awake	3	P2	Soma	8				---
awake	4	P2	Process	26				Signif. codes: 0 ‘***’ 0.001 ‘**’ 0.01 ‘*’ 0.05 ‘.’ 0.1 ‘ ’ 1
awake	4	P2	Soma	11.3333				Condition lsmean SE df lower.CL upper.CL
awake	5	P1	Process	32.6667				awake 37.78793 3.038884 0.44 -1004.872 1080.4483
awake	5	P1	Soma	10.6667				ex_vivo 44.73763 1.753601 22.88 -556.934 646.4093
awake	6	P1	Process	27.3333				Degrees-of-freedom method: satterthwaite
awake	6	P1	Soma	12				Confidence level used: 0.95
awake	7	P1	Process	32				contrast estimate SE df t.ratio p.value
awake	7	P1	Soma	10.6667				awake - ex_vivo -6.949704 3.508551 0.72 -1.981 0.3660
awake	8	P1	Process	24.6667
awake	8	P1	Soma	9.33333				Soma
awake	9	P1	Process	24				Models:
awake	9	P1	Soma	3.33333				freq.null: freq ~ (1 | animalname) + (1 | Spot)
awake	10	P1	Process	32				freq.model2: freq ~ Condition + (1 | animalname) + (1 | Spot)
awake	10	P1	Soma	11.3333				Df AIC BIC logLik deviance Chisq Chi Df Pr(>Chisq)
awake	11	P1	Process	24.6667				freq.null 4 971.12 984.36 -481.56 963.12
awake	11	P1	Soma	12.6667				freq.model2 5 971.14 987.69 -480.57 961.14 1.9783 1 0.1596
awake	12	P1	Process	37.3333				Condition lsmean SE df lower.CL upper.CL
awake	12	P1	Soma	8.66667				awake 7.629381 0.5980794 8.68 6.268828 8.989934
awake	13	P1	Process	32.6667				ex_vivo 8.671701 0.2766236 92.04 8.042419 9.300984
awake	13	P1	Soma	6.66667				Degrees-of-freedom method: satterthwaite
awake	14	P1	Process	33.3333				Confidence level used: 0.95
awake	15	P2	Process	28.6667				contrast estimate SE df t.ratio p.value
awake	14	P1	Soma	6				awake - ex_vivo -1.04232 0.6589534 11.45 -1.582 0.1409
awake	15	P2	Soma	13.3333
awake	16	P1	Process	26.6667
awake	16	P1	Soma	6.66667
awake	17	P1	Process	42				anesthetized_vs_exvivo
awake	17	P1	Soma	5.33333				Soma
awake	18	P1	Process	32.6667				Models:
awake	18	P1	Soma	12				freq.null: freq ~ (1 | animalname) + (1 | Spot)
awake	19	P2	Process	24.6667				freq.model2: freq ~ Condition + (1 | animalname) + (1 | Spot)
awake	19	P2	Soma	4				Df AIC BIC logLik deviance Chisq Chi Df Pr(>Chisq)
awake	20	P2	Process	38				freq.null 4 927.53 940.71 -459.77 919.53
awake	20	P2	Soma	10				freq.model2 5 929.26 945.73 -459.63 919.26 0.2737 1 0.6008
awake	21	P1	Soma	5.33333				Condition lsmean SE df lower.CL upper.CL
awake	21	P1	Process	56				ex_vivo 8.688123 0.2408582 67.42 8.207424 9.168822
awake	22	P1	Process	35.3333				in_vivo 8.466682 0.2726204 7.32 7.922592 9.010772
awake	22	P1	Soma	6.66667				Degrees-of-freedom method: satterthwaite
awake	23	P1	Process	24.6667				Confidence level used: 0.95
awake	23	P1	Soma	10.6667				contrast estimate SE df t.ratio p.value
awake	24	P1	Soma	6				ex_vivo - in_vivo 0.2214413 0.3637782 15.12 0.609 0.5517
awake	24	P1	Process	60
awake	25	P3	Process	76				Process
awake	25	P3	Soma	6				Models:
awake	26	P3	Process	29.3333				freq.null: freq ~ (1 | animalname) + (1 | Spot)
awake	26	P3	Soma	12				freq.model2: freq ~ Condition + (1 | animalname) + (1 | Spot)
awake	27	P3	Process	32.6667				Df AIC BIC logLik deviance Chisq Chi Df Pr(>Chisq)
awake	27	P3	Soma	8				freq.null 4 1752.3 1765.5 -872.14 1744.3
awake	28	P3	Process	42				freq.model2 5 1754.2 1770.7 -872.11 1744.2 0.0589 1 0.8082
awake	28	P3	Soma	4				Condition lsmean SE df lower.CL upper.CL
awake	29	P3	Process	29.3333				ex_vivo 44.74676 1.942410 116.15 40.89962 48.59389
awake	29	P3	Soma	10				in_vivo 45.48517 2.268679 27.50 40.99183 49.97852
awake	30	P3	Process	28.6667				Degrees-of-freedom method: satterthwaite
awake	30	P3	Soma	4.66667				Confidence level used: 0.95
awake	31	P3	Process	74.6667				contrast estimate SE df t.ratio p.value
awake	31	P3	Soma	4.66667				ex_vivo - in_vivo -0.7384165 2.986614 47.03 -0.247 0.8058
awake	32	P3	Process	27.3333
awake	32	P3	Soma	5.33333
awake	33	P3	Process	27.3333				awake_vs_anesthetized
awake	33	P3	Soma	4				Soma
awake	34	P3	Process	22.6667				Models:
awake	34	P3	Soma	8.66667				freq.null: freq ~ (1 | animalname) + (1 | Spot)
awake	35	P3	Process	32				freq.model2: freq ~ Condition + (1 | animalname) + (1 | Spot)
awake	35	P3	Soma	2.66667				Df AIC BIC logLik deviance Chisq Chi Df Pr(>Chisq)
awake	36	P3	Soma	7.33333				freq.null 4 881.63 894.59 -436.81 873.63
awake	36	P3	Process	29.3333				freq.model2 5 882.79 899.00 -436.39 872.79 0.8385 1 0.3598
awake	37	P3	Process	26.6667				Condition lsmean SE df lower.CL upper.CL
awake	37	P3	Soma	3.33333				anesthetized 8.299384 0.3179560 37.52 7.655445 8.943323
awake	38	P3	Process	30.6667				awake 7.629366 0.5601291 8.81 6.494967 8.763765
awake	38	P3	Soma	4.66667				Degrees-of-freedom method: satterthwaite
awake	39	P3	Soma	4				Confidence level used: 0.95
awake	39	P3	Process	46.6667				contrast estimate SE df t.ratio p.value
awake	40	P3	Process	45.3333				anesthetized - awake 0.6700178 0.6440812 11.6 1.04 0.3194
awake	40	P3	Soma	5.33333
awake	41	P3	Process	35.3333				Process
awake	41	P3	Soma	4				Models:
awake	42	P3	Process	32				freq.null: freq ~ (1 | animalname) + (1 | Spot)
awake	42	P3	Soma	6				freq.model2: freq ~ Condition + (1 | animalname) + (1 | Spot)
awake	43	P3	Process	32				Df AIC BIC logLik deviance Chisq Chi Df Pr(>Chisq)
awake	43	P3	Soma	9.33333				freq.null 4 1612.0 1625.0 -801.99 1604.0
awake	44	P3	Process	56				freq.model2 5 1610.7 1626.9 -800.36 1600.7 3.2725 1 0.07045 .
awake	44	P3	Soma	4				---
awake	45	P3	Process	20.6667				Signif. codes: 0 ‘***’ 0.001 ‘**’ 0.01 ‘*’ 0.05 ‘.’ 0.1 ‘ ’ 1
awake	45	P3	Soma	8				Condition lsmean SE df lower.CL upper.CL
awake	46	P3	Process	48				anesthetized 45.21982 2.130093 27.55 40.85327 49.58636
awake	46	P3	Soma	3.33333				awake 37.43124 3.439965 4.91 30.37955 44.48294
awake	47	P3	Soma	12				Degrees-of-freedom method: satterthwaite
awake	47	P3	Process	51.3333				Confidence level used: 0.95
awake	48	P3	Process	32				contrast estimate SE df t.ratio p.value
awake	48	P3	Soma	6				anesthetized - awake 7.788571 4.046067 7.01 1.925 0.0955
awake	49	P3	Soma	7.33333
awake	49	P3	Process	78.6667
awake	50	P3	Process	60
awake	50	P3	Soma	5.33333
awake	51	P3	Soma	4.66667
awake	51	P3	Process	30
awake	52	P3	Soma	7.33333
awake	52	P3	Process	41.3333
awake	53	P3	Soma	8.66667
awake	53	P3	Process	35.3333
awake	54	P3	Process	34
awake	54	P3	Soma	7.33333
awake	55	P3	Process	56
awake	55	P3	Soma	8
awake	56	P3	Process	70.6667
awake	56	P3	Soma	2.66667
awake	57	P3	Process	44
awake	57	P3	Soma	5.33333
awake	58	P3	Process	37.3333
awake	58	P3	Soma	4
awake	59	P3	Process	23.3333
awake	59	P3	Soma	11.3333
awake	60	P3	Process	62.6667
awake	60	P3	Soma	6.66667
awake	61	P3	Process	36.6667
awake	61	P3	Soma	8.66667
awake	62	P3	Process	34
awake	62	P3	Soma	4.66667
awake	63	P3	Process	46
awake	63	P3	Soma	4
awake	64	P3	Process	30
awake	64	P3	Soma	7.33333
awake	65	P3	Soma	10
awake	65	P3	Process	24.6667
awake	66	P3	Soma	10.6667
awake	66	P3	Process	41.3333
awake	67	P3	Process	20.6667
awake	67	P3	Soma	2
awake	68	P3	Process	44.6667
awake	68	P3	Soma	6
awake	69	P3	Process	42.6667
awake	69	P3	Soma	4
awake	70	P3	Process	19.3333
awake	70	P3	Soma	9.33333
awake	71	P3	Process	45.3333
awake	71	P3	Soma	4.66667
awake	72	P3	Process	37.3333
awake	72	P3	Soma	4
awake	73	P3	Process	48.6667
awake	73	P3	Soma	6.66667
awake	74	P3	Process	24
awake	74	P3	Soma	4.66667
awake	75	P3	Process	76
awake	75	P3	Soma	8
awake	76	P3	Soma	5.33333
awake	76	P3	Process	35.3333
awake	77	P3	Process	53.3333
awake	77	P3	Soma	4.66667
awake	78	P3	Process	45.3333
awake	78	P3	Soma	5.33333
awake	79	P3	Process	38
awake	79	P3	Soma	6
awake	80	P3	Process	23.3333
awake	80	P3	Soma	9.33333
awake	81	P3	Process	47.3333
awake	81	P3	Soma	8.66667
awake	82	P3	Process	34
awake	82	P3	Soma	6.66667
awake	83	P3	Process	76.6667
awake	83	P3	Soma	6
awake	84	P3	Process	52
awake	84	P3	Soma	5.33333
awake	85	P3	Process	30.6667
awake	85	P3	Soma	10
awake	86	P3	Process	56.6667
awake	86	P3	Soma	6
awake	87	P3	Process	34.6667
awake	87	P3	Soma	5.33333
awake	88	P3	Process	46.6667
awake	88	P3	Soma	4.66667
awake	89	P3	Process	43.3333
awake	89	P3	Soma	4
awake	90	P3	Process	35.3333
awake	90	P3	Soma	6
awake	91	P3	Process	32
awake	91	P3	Soma	4
awake	92	P3	Process	52
awake	92	P3	Soma	6
awake	93	P3	Process	30.6667
awake	93	P3	Soma	5.33333
awake	94	P3	Process	61.3333
awake	94	P3	Soma	6
awake	95	P3	Process	74.6667
awake	95	P3	Soma	12
awake	96	P3	Process	55.3333
awake	96	P3	Soma	3.33333
ex_vivo	1	fN1244LL	Process	64.6667
ex_vivo	1	fN1244LL	Soma	7.33333
ex_vivo	2	fN1493R	Process	20.6667
ex_vivo	2	fN1493R	Soma	8.66667
ex_vivo	3	fN1727L	Process	28.6667
ex_vivo	3	fN1727L	Soma	12
ex_vivo	4	fN1727L	Process	39.3333
ex_vivo	4	fN1727L	Soma	8.66667
ex_vivo	5	fN1727L	Process	37.3333
ex_vivo	5	fN1727L	Soma	7.33333
ex_vivo	6	fN1728R	Process	42
ex_vivo	6	fN1728R	Soma	12.6667
ex_vivo	7	fS02103R	Process	31.3333
ex_vivo	7	fS02103R	Soma	10.6667
ex_vivo	8	fS02103R	Process	84
ex_vivo	8	fS02103R	Soma	8.66667
ex_vivo	9	fS02094R	Process	54.6667
ex_vivo	9	fS02094R	Soma	9.33333
ex_vivo	10	fS02094R	Process	56
ex_vivo	10	fS02094R	Soma	7.33333
ex_vivo	11	fS02094R	Process	52.6667
ex_vivo	11	fS02094R	Soma	7.33333
ex_vivo	12	fS02093L	Process	34
ex_vivo	12	fS02093L	Soma	12.6667
ex_vivo	13	fS02093L	Process	49.3333
ex_vivo	13	fS02093L	Soma	10.6667
ex_vivo	14	fS02093L	Process	47.3333
ex_vivo	15	fS02093L	Soma	11.3333
ex_vivo	14	fS02093L	Process	66.6667
ex_vivo	15	fS02093L	Soma	8.66667
ex_vivo	16	fS02093L	Process	75.3333
ex_vivo	16	fS02093L	Soma	6.66667
ex_vivo	17	fS02093L	Process	20
ex_vivo	17	fS02093L	Soma	6.66667
ex_vivo	18	fS02084R	Process	54.6667
ex_vivo	18	fS02084R	Soma	12.6667
ex_vivo	19	fS02628LL	Process	46
ex_vivo	19	fS02628LL	Soma	5.33333
ex_vivo	20	fS02626R	Process	22.6667
ex_vivo	20	fS02626R	Soma	10
ex_vivo	21	fS02626R	Process	40
ex_vivo	21	fS02626R	Soma	14.6667
ex_vivo	22	fS02626R	Process	41.3333
ex_vivo	22	fS02626R	Soma	10
ex_vivo	23	fS02208L	Process	52.6667
ex_vivo	23	fS02208L	Soma	11.3333
ex_vivo	24	mSM1853L	Process	18
ex_vivo	24	mSM1853L	Soma	11.3333
ex_vivo	25	mS03655RR	Process	64
ex_vivo	25	mS03655RR	Soma	12
ex_vivo	26	mS03655RR	Process	20
ex_vivo	26	mS03655RR	Soma	6
ex_vivo	27	mS03655RR	Process	63.3333
ex_vivo	27	mS03655RR	Soma	10
ex_vivo	28	mS03655RR	Process	46.6667
ex_vivo	28	mS03655RR	Soma	4.66667
ex_vivo	29	mS03007R	Process	36.6667
ex_vivo	29	mS03007R	Soma	6.66667
ex_vivo	30	fS03648L	Process	42.6667
ex_vivo	30	fS03648L	Soma	6.66667
ex_vivo	31	fS03648L	Process	37.3333
ex_vivo	31	fS03648L	Soma	11.3333
ex_vivo	32	mSO4185L	Process	28.6667
ex_vivo	32	mSO4185L	Soma	8.66667
ex_vivo	33	mSO4185L	Process	12.6667
ex_vivo	33	mSO4185L	Soma	4
ex_vivo	34	mS05094R	Process	37.3333
ex_vivo	34	mS05094R	Soma	6
ex_vivo	35	mS05794R	Process	60.6667
ex_vivo	35	mS05794R	Soma	14.6667
ex_vivo	36	mS05794R	Process	28.6667
ex_vivo	36	mS05794R	Soma	6
ex_vivo	37	mS05793L	Process	32.6667
ex_vivo	37	mS05793L	Soma	5.33333
ex_vivo	38	mS03004L	Process	65.3333
ex_vivo	38	mS03004L	Soma	8.66667
ex_vivo	39	mS03004L	Process	18.6667
ex_vivo	39	mS03004L	Soma	6.66667
ex_vivo	40	mS03004L	Process	36
ex_vivo	40	mS03004L	Soma	8
ex_vivo	41	mS03005R	Process	34.6667
ex_vivo	41	mS03005R	Soma	6
ex_vivo	42	mS03005R	Process	52.6667
ex_vivo	42	mS03005R	Soma	6.66667
ex_vivo	43	mS03005R	Process	30
ex_vivo	43	mS03005R	Soma	8
ex_vivo	44	fS04244L	Process	61.3333
ex_vivo	44	fS04244L	Soma	10
ex_vivo	45	fS04244L	Process	46
ex_vivo	45	fS04244L	Soma	10
ex_vivo	46	fS04244L	Process	24.6667
ex_vivo	46	fS04244L	Soma	12
ex_vivo	47	fS04244L	Process	13.3333
ex_vivo	47	fS04244L	Soma	8
ex_vivo	48	fS05316LRR	Process	69.3333
ex_vivo	48	fS05316LRR	Soma	5.33333
ex_vivo	49	fS05316LRR	Process	70.6667
ex_vivo	49	fS05316LRR	Soma	13.3333
ex_vivo	50	fS03691LR	Process	71.3333
ex_vivo	50	fS03691LR	Soma	6.66667
ex_vivo	51	fS03691LR	Process	56.6667
ex_vivo	51	fS03691LR	Soma	8
ex_vivo	52	fS07018R	Process	32
ex_vivo	52	fS07018R	Soma	7.33333
ex_vivo	53	fS07018R	Process	67.3333
ex_vivo	53	fS07018R	Soma	6.66667
ex_vivo	54	mS06657LR	Process	44
ex_vivo	54	mS06657LR	Soma	8
ex_vivo	55	mS06657LR	Process	52.6667
ex_vivo	55	mS06657LR	Soma	7.33333
ex_vivo	56	fS07146R	Process	59.3333
ex_vivo	56	fS07146R	Soma	9.33333
ex_vivo	57	fS07146R	Process	45.3333
ex_vivo	57	fS07146R	Soma	7.33333
ex_vivo	58	fS07146R	Process	51.3333
ex_vivo	58	fS07146R	Soma	4
ex_vivo	59	fS07146R	Process	34.6667
ex_vivo	59	fS07146R	Soma	9.33333
ex_vivo	60	fS07146R	Process	32.6667
ex_vivo	60	fS07146R	Soma	8
ex_vivo	61	fS07147LR	Process	31.3333
ex_vivo	61	fS07147LR	Soma	9.33333
ex_vivo	62	fS07147LR	Process	25.3333
ex_vivo	62	fS07147LR	Soma	6.66667
ex_vivo	63	fSO8215L	Process	26.6667
ex_vivo	63	fSO8215L	Soma	6
ex_vivo	64	fSO8215L	Process	22.6667
ex_vivo	64	fSO8215L	Soma	4.66667
ex_vivo	65	mSP45329LR	Process	39.3333
ex_vivo	65	mSP45329LR	Soma	8
ex_vivo	66	fSJ6807R	Process	11.3333
ex_vivo	66	fSJ6807R	Soma	4
ex_vivo	67	fSJ6807R	Process	34.6667
ex_vivo	67	fSJ6807R	Soma	8.66667
ex_vivo	68	mSJ6804LL	Process	28.6667
ex_vivo	68	mSJ6804LL	Soma	6.66667
ex_vivo	69	mSJ6804LL	Process	32.6667
ex_vivo	69	mSJ6804LL	Soma	10.6667
ex_vivo	70	fSL3746L	Process	32.6667
ex_vivo	70	fSL3746L	Soma	6.66667
ex_vivo	71	fSO7017L	Process	53.3333
ex_vivo	71	fSO7017L	Soma	8
ex_vivo	72	fSO7017L	Process	30
ex_vivo	72	fSO7017L	Soma	8.66667
ex_vivo	73	fSO7736L	Process	23.3333
ex_vivo	73	fSO7736L	Soma	7.33333
ex_vivo	74	fSO7736L	Process	34.6667
ex_vivo	74	fSO7736L	Soma	6.66667
ex_vivo	75	female	Process	43.3333
ex_vivo	75	female	Soma	8.66667
ex_vivo	76	fSO352R	Process	71.3333
ex_vivo	76	fSO352R	Soma	19.3333
ex_vivo	77	fSO352R	Process	48
ex_vivo	77	fSO352R	Soma	9.33333
ex_vivo	78	fSO352R	Process	70.6667
ex_vivo	78	fSO352R	Soma	9.33333
ex_vivo	79	mSO9417L	Process	67.3333
ex_vivo	79	mSO9417L	Soma	9.33333
ex_vivo	80	mSO9417L	Process	20.6667
ex_vivo	80	mSO9417L	Soma	11.3333
ex_vivo	81	mSO9418R	Process	26.6667
ex_vivo	81	mSO9418R	Soma	10.6667
ex_vivo	82	fSO1245L	Process	72
ex_vivo	82	fSO1245L	Soma	6.66667
ex_vivo	83	fSO1251R	Process	48.6667
ex_vivo	83	fSO1251R	Soma	8.66667
ex_vivo	84	fSO1251R	Process	82
ex_vivo	84	fSO1251R	Soma	12.6667
ex_vivo	85	fSL3749LL	Process	58
ex_vivo	85	fSL3749LL	Soma	8.66667
ex_vivo	86	fSO5788L	Process	60
ex_vivo	86	fSO5788L	Soma	12
ex_vivo	87	fSO5788L	Process	64.6667
ex_vivo	87	fSO5788L	Soma	10
ex_vivo	88	fSM1954L	Process	31.3333
ex_vivo	88	fSM1954L	Soma	8.66667
ex_vivo	89	mSL5591RR	Process	42
ex_vivo	89	mSL5591RR	Soma	6.66667
ex_vivo	90	mSL5591RR	Process	26.6667
ex_vivo	90	mSL5591RR	Soma	14
ex_vivo	91	mSL5591RR	Process	42.6667
ex_vivo	91	mSL5591RR	Soma	8
ex_vivo	92	mSL5508R	Process	32.6667
ex_vivo	92	mSL5508R	Soma	7.33333
ex_vivo	93	mSL5508R	Process	11.3333
ex_vivo	93	mSL5508R	Soma	8
ex_vivo	94	mSL5508R	Process	96
ex_vivo	94	mSL5508R	Soma	6.66667
ex_vivo	95	mSL5619R	Process	39.3333
ex_vivo	95	mSL5619R	Soma	5.33333
ex_vivo	96	mSL5895L	Process	42.6667
ex_vivo	96	mSL5895L	Soma	12
ex_vivo	97	mSL5895L	Process	39.3333
ex_vivo	97	mSL5895L	Soma	11.3333
ex_vivo	98	mSL5895L	Process	15.3333
ex_vivo	98	mSL5895L	Soma	8
ex_vivo	99	mSL5896R	Process	86.6667
ex_vivo	99	mSL5896R	Soma	6
ex_vivo	100	mSL5896R	Process	25.3333
ex_vivo	100	mSL5896R	Soma	6
ex_vivo	101	mSL5896R	Process	66
ex_vivo	101	mSL5896R	Soma	8
ex_vivo	102	fSL6897R	Process	43.3333
ex_vivo	102	fSL6897R	Soma	8
ex_vivo	103	fSL6897R	Process	53.3333
ex_vivo	103	fSL6897R	Soma	12.6667
ex_vivo	104	fSL6897R	Process	100.667
ex_vivo	104	fSL6897R	Soma	8.66667
ex_vivo	105	fSL7056R	Process	100.667
ex_vivo	105	fSL7056R	Soma	8
ex_vivo	106	mSJ6802R	Process	30.6667
ex_vivo	106	mSJ6802R	Soma	10.6667
anesthetized	1	younger male	Process	38.6667
anesthetized	1	younger male	Soma	6
anesthetized	2	young_female	Process	54
anesthetized	2	young_female	Soma	8.66667
anesthetized	3	younger male	Process	62.6667
anesthetized	3	younger male	Soma	6
anesthetized	4	female young	Process	14.6667
anesthetized	4	female young	Soma	6.66667
anesthetized	5	female young	Process	30.6667
anesthetized	5	female young	Soma	6.66667
anesthetized	6	female young	Process	76
anesthetized	6	female young	Soma	7.33333
anesthetized	7	female young	Process	40.6667
anesthetized	7	female young	Soma	14
anesthetized	8	female young	Process	38.6667
anesthetized	8	female young	Soma	8.66667
anesthetized	9	female young	Process	24.6667
anesthetized	9	female young	Soma	10
anesthetized	10	female young	Process	36.6667
anesthetized	10	female young	Soma	10
anesthetized	11	female young	Process	28
anesthetized	11	female young	Soma	9.33333
anesthetized	12	female young	Process	38
anesthetized	12	female young	Soma	10
anesthetized	13	female young	Process	66.6667
anesthetized	13	female young	Soma	12
anesthetized	14	female young	Process	56
anesthetized	14	female young	Soma	7.33333
anesthetized	15	female young	Process	31.3333
anesthetized	15	female young	Soma	10
anesthetized	16	female young	Process	42
anesthetized	16	female young	Soma	4.66667
anesthetized	17	female young	Process	72
anesthetized	17	female young	Soma	10.6667
anesthetized	18	mN1246L	Process	61.3333
anesthetized	18	mN1246L	Soma	10
anesthetized	19	mN1246L	Process	44
anesthetized	19	mN1246L	Soma	9.33333
anesthetized	20	mN1246L	Process	78.6667
anesthetized	20	mN1246L	Soma	7.33333
anesthetized	21	mN1246L	Process	55.3333
anesthetized	21	mN1246L	Soma	10
anesthetized	22	mN1246L	Process	56
anesthetized	22	mN1246L	Soma	9.33333
anesthetized	23	mN1246L	Process	24.6667
anesthetized	23	mN1246L	Soma	8.66667
anesthetized	24	mN1246L	Process	42
anesthetized	24	mN1246L	Soma	8
anesthetized	25	mN1246L	Process	54.6667
anesthetized	25	mN1246L	Soma	10.6667
anesthetized	26	fN0690L	Process	82.6667
anesthetized	26	fN0690L	Soma	5.33333
anesthetized	27	fN0690L	Process	54.6667
anesthetized	27	fN0690L	Soma	6
anesthetized	28	mN1246L	Process	106
anesthetized	28	mN1246L	Soma	7.33333
anesthetized	29	mN1246L	Process	80
anesthetized	29	mN1246L	Soma	9.33333
anesthetized	30	mN1246L	Process	32.6667
anesthetized	30	mN1246L	Soma	11.3333
anesthetized	31	mN1246L	Process	66
anesthetized	31	mN1246L	Soma	8.66667
anesthetized	32	mN1246L	Process	93.3333
anesthetized	32	mN1246L	Soma	12
anesthetized	33	mN1246L	Process	63.3333
anesthetized	33	mN1246L	Soma	13.3333
anesthetized	34	mN1247R	Process	33.3333
anesthetized	34	mN1247R	Soma	8
anesthetized	35	mN1247R	Process	52
anesthetized	35	mN1247R	Soma	10
anesthetized	36	mN1247R	Process	48
anesthetized	36	mN1247R	Soma	8
anesthetized	37	mN1246L	Process	34.6667
anesthetized	37	mN1246L	Soma	6
anesthetized	38	mN1246L	Process	46
anesthetized	38	mN1246L	Soma	6
anesthetized	39	mN1246L	Process	17.3333
anesthetized	39	mN1246L	Soma	4.66667
anesthetized	40	mN1246L	Process	31.3333
anesthetized	40	mN1246L	Soma	10
anesthetized	41	mN1246L	Process	50.6667
anesthetized	41	mN1246L	Soma	6.66667
anesthetized	42	mS02091LL	Process	62.6667
anesthetized	42	mS02091LL	Soma	9.33333
anesthetized	43	mS02091LL	Process	63.3333
anesthetized	43	mS02091LL	Soma	10.6667
anesthetized	44	mS02090LR	Process	64.6667
anesthetized	44	mS02090LR	Soma	8
anesthetized	45	mS02090LR	Process	68.6667
anesthetized	45	mS02090LR	Soma	8.66667
anesthetized	46	mS02090LR	Process	53.3333
anesthetized	46	mS02090LR	Soma	6.66667
anesthetized	47	mS02090LR	Process	18.6667
anesthetized	47	mS02090LR	Soma	11.3333
anesthetized	48	fSO4193R	Process	48.6667
anesthetized	48	fSO4235LL	Process	51.3333
anesthetized	49	fSO4193R	Soma	8.66667
anesthetized	49	fSO4235LL	Soma	8.66667
anesthetized	50	fSO4193R	Process	42
anesthetized	50	fSO4235LL	Process	52
anesthetized	51	fSO4193R	Soma	6.66667
anesthetized	51	fSO4235LL	Soma	6
anesthetized	52	fSO4193R	Process	47.3333
anesthetized	52	fSO4235LL	Process	34
anesthetized	53	fSO4193R	Soma	6.66667
anesthetized	53	fSO4235LL	Soma	10
anesthetized	54	female 6LL	Process	21.3333
anesthetized	54	female 6LL	Soma	6
anesthetized	55	fSO9485LR	Process	44.6667
anesthetized	55	fSO9485LR	Soma	14
anesthetized	56	female 6LR	Process	30.6667
anesthetized	56	female 6LR	Soma	9.33333
anesthetized	57	fSO9485LR	Process	24
anesthetized	57	fSO9485LR	Soma	10
anesthetized	58	fSO8970L	Process	68
anesthetized	58	fSO8970L	Soma	8.66667
anesthetized	59	fSO9485LR	Process	32.6667
anesthetized	59	fSO9485LR	Soma	14
anesthetized	60	fSO9485LR	Process	35.3333
anesthetized	60	fSO9485LR	Soma	10
anesthetized	61	fSO9485LR	Process	96
anesthetized	61	fSO9485LR	Soma	11.3333
anesthetized	62	female 6LR	Process	51.3333
anesthetized	62	female 6LR	Soma	9.33333
anesthetized	63	female 6LR	Process	38
anesthetized	63	female 6LR	Soma	7.33333
anesthetized	64	fSO8970L	Process	38
anesthetized	64	fSO8970L	Soma	10.6667
anesthetized	65	fSO4235LL	Process	58.6667
anesthetized	65	fSO4235LL	Soma	8.66667
anesthetized	66	fSO4235LL	Process	36
anesthetized	66	fSO4235LL	Soma	6
anesthetized	67	fSO8970L	Process	48
anesthetized	67	fSO8970L	Soma	9.33333
anesthetized	68	fSO9485LR	Process	27.3333
anesthetized	68	fSO9485LR	Soma	6.66667
anesthetized	69	fSO9485LR	Process	80
anesthetized	69	fSO9485LR	Soma	6.66667
anesthetized	70	fSO9485LR	Process	56
anesthetized	70	fSO9485LR	Soma	10
anesthetized	71	fSM1956LR	Process	18.6667
anesthetized	71	fSM1956LR	Soma	8
anesthetized	72	fSM1955R	Process	25.3333
anesthetized	72	fSM1955R	Soma	10
anesthetized	73	fSL5614L	Process	50.6667
anesthetized	73	fSL5614L	Soma	5.33333
anesthetized	74	fSL5614L	Process	12
anesthetized	74	fSL5614L	Soma	7.33333
anesthetized	75	fSM1956LR	Process	35.3333
anesthetized	75	fSM1956LR	Soma	7.33333
anesthetized	76	fSL5884L	Process	37.3333
anesthetized	76	mSL5879R	Process	14
anesthetized	77	fSL5884L	Soma	11.3333
anesthetized	77	mSL5879R	Soma	8.66667
anesthetized	78	mSL5879R	Process	36.6667
anesthetized	78	mSL5879R	Soma	10.6667
anesthetized	79	mSL5880LR	Process	26.6667
anesthetized	79	mSL5880LR	Soma	6
anesthetized	80	fSM1956LR	Process	29.3333
anesthetized	80	fSM1956LR	Soma	6.66667
anesthetized	81	fSM1956LR	Process	50
anesthetized	81	fSM1956LR	Soma	12
anesthetized	82	fSM1955R	Process	39.3333
anesthetized	82	fSM1956LR	Process	18.6667
anesthetized	83	fSM1955R	Soma	6.66667
anesthetized	83	fSM1956LR	Soma	8
anesthetized	84	mSL5879R	Process	32
anesthetized	84	mSL5879R	Soma	8.66667
anesthetized	85	mSL5879R	Process	22
anesthetized	85	mSL5879R	Soma	8
anesthetized	86	fSL5884L	Process	40.6667
anesthetized	86	fSL5884L	Soma	7.33333
anesthetized	87	fSL5884L	Process	40
anesthetized	87	fSL5884L	Soma	7.33333
anesthetized	88	fSL5884L	Process	22.6667
anesthetized	88	fSL5884L	Soma	2
anesthetized	89	fSP6953LR	Process	50.6667
anesthetized	89	fSP6953LR	Soma	5.33333
anesthetized	90	fSL7168LR	Process	34.6667
anesthetized	90	fSL7168LR	Soma	8
anesthetized	91	mSP8227L	Process	34
anesthetized	91	mSP8227L	Soma	8
anesthetized	92	fSL9054R	Process	63.3333
anesthetized	92	fSL9054R	Soma	10
anesthetized	93	fSP8231L	Process	61.3333
anesthetized	93	fSP8231L	Soma	4.66667

## Sheet: 3F
	baseline_SMC	U46619_SMC		SMC
	2.66	10		Paired t test
	2	6		P value	<0.001
	2	8.66		P value summary	***
	1.33	8		Significantly different (P < 0.05)?	Yes
	1.33	5.33		One- or two-tailed P value?	Two-tailed
	4.66	6		t, df	t=8.742 df=13
	3.33	6		Number of pairs	14
	0.66	4.66		Mean of differences	5.81
	1.33	8.66		SD of differences	2.487
	0.66	8.66		SEM of differences	0.6646
	0	6.66		95% confidence interval	4.374 to 7.245
	0	10		R squared (partial eta squared)	0.8546
	0.66	9.33
	2	6
Number of values	14	14
25% Percentile	0.6667	6
Median	1.333	7.333
75% Percentile	2.167	8.833
Mean	1.619	7.429
Std. Deviation	1.3	1.809
Std. Error of Mean	0.3474	0.4835
Lower 95% CI	0.8685	6.384
Upper 95% CI	2.37	8.473
	baseline_EP_soma	U46619_EP_Soma		EP
	2	10		Paired t test
	4.66	13.33		P value	<0.001
	2.66	16.66		P value summary	***
	0	5.33		Significantly different (P < 0.05)?	Yes
	0	6.66		One- or two-tailed P value?	Two-tailed
	3.33	9.33		t, df	t=5.156 df=10
	0	12.66		Number of pairs	11
	0.66	7.33		Mean of differences	7.394
	0.66	14		SD of differences	4.756
	3.33	4		SEM of differences	1.434
	3.33	2.66		95% confidence interval	4.199 to 10.59
				R squared (partial eta squared)	0.7267
Number of values	11	11
25% Percentile	0	5.333
Median	2	9.333
75% Percentile	3.333	13.33
Mean	1.879	9.273
Std. Deviation	1.682	4.506
Std. Error of Mean	0.5071	1.359
Lower 95% CI	0.749	6.245
Upper 95% CI	3.009	12.3
	baseline_EP_process	U46619_EP_Process		Paired t test
	7.33	20		P value	<0.001
	4	21.33		P value summary	***
	1.33	9.33		Significantly different (P < 0.05)?	Yes
	2	12.66		One- or two-tailed P value?	Two-tailed
	1.33	13.33		t, df	t=8.841 df=10
	0	15.33		Number of pairs	11
	0	9.33		Mean of differences	12
	0	19.33		SD of differences	4.502
	0	15.33		SEM of differences	1.357
	2	8.66		95% confidence interval	8.976 to 15.02
	2.66	8		R squared (partial eta squared)	0.8866
Number of values	11	11
25% Percentile	0	9.333
Median	1.333	13.33
75% Percentile	2.667	19.33
Mean	1.879	13.88
Std. Deviation	2.227	4.815
Std. Error of Mean	0.6716	1.452
Lower 95% CI	0.3824	10.64
Upper 95% CI	3.375	17.11

## Sheet: 3H
auc
baseline	U46619		Wilcoxon matched-pairs signed rank test
7.3279	370.526		P value	<0.001
18.5896	122.305		Exact or approximate P value?	Exact
4.0463	182.341		P value summary	***
1.2211	306.451		Significantly different (P < 0.05)?	Yes
2.5893	107.342		One- or two-tailed P value?	Two-tailed
-6.1804	140.32		Sum of positive, negative ranks	136 , 0
-0.388	89.8963		Sum of signed ranks (W)	136
0.7364	80.9637		Number of pairs	16
0.5456	81.4828
-2.8724	85.1507
-0.8183	182.763
9.1443	682.04
-2.595	107.653
4.7044	184.167
-3.1236	286.313
-3.1498	273.543
