# Supplementary material for: Distinct signatures of calcium activity in brain mural cells
Source: eLife. 2021 Jul 6;10:e70591. doi: 10.7554/eLife.70591 (PMC8294852; doi:10.7554/eLife.70591)
Supplement: Figure 4—figure supplement 1—source data 1. [file elife-70591-fig4-figsupp1-data1.xlsx]

## Sheet: figure 4-supp1
raw data for figure 4 figure supplement 1
	baseline_Soma	DMSO_Soma
	6	8			Paired t test
	10	8			P value	0.43
	12	8			P value summary	ns
	6	8			Significantly different (P < 0.05)?	No
	10	10			One- or two-tailed P value?	Two-tailed
	8	8			t, df	t=0.8195 df=10
	18	16			Number of pairs	11
	10	10			Mean of differences	-0.5455
	14	10			SD of differences	2.207
	14	14			SEM of differences	0.6656
	8	10			95% confidence interval	-2.028 to 0.9375
					R squared (partial eta squared)	0.06294
Number of values	11	11
25% Percentile	8	8
Median	10	10
75% Percentile	14	10
Mean	10.55	10
Std. Deviation	3.698	2.683
Std. Error of Mean	1.115	0.809
Lower 95% CI	8.061	8.197
Upper 95% CI	13.03	11.8
	baseline_Process	DMSO_Process
	60	64			Paired t test
	68	82			P value	0.86
	46	26			P value summary	ns
	24	26			Significantly different (P < 0.05)?	No
	42	36			One- or two-tailed P value?	Two-tailed
	58	58			t, df	t=0.1835 df=10
	32	26			Number of pairs	11
	84	72			Mean of differences	-0.9091
	58	60			SD of differences	16.43
	24	60			SEM of differences	4.953
	56	32			95% confidence interval	-11.95 to 10.13
					R squared (partial eta squared)	0.003357
Number of values	11	11
25% Percentile	32	26
Median	56	58
75% Percentile	60	64
Mean	50.18	49.27
Std. Deviation	18.71	20.52
Std. Error of Mean	5.64	6.187
Lower 95% CI	37.61	35.49
Upper 95% CI	62.75	63.06
