# Supplementary material for: Distinct signatures of calcium activity in brain mural cells
Source: eLife. 2021 Jul 6;10:e70591. doi: 10.7554/eLife.70591 (PMC8294852; doi:10.7554/eLife.70591)
Supplement: Figure 4—source data 1. [file elife-70591-fig4-data1.xlsx]

## Sheet: 4A
auc
baseline	Endothelin1		Wilcoxon matched-pairs signed rank test
-18.0503	431.4		P value	0.02
-1.744	494.334		Exact or approximate P value?	Exact
55.1873	3041.3		P value summary	*
-37.432	603.539		Significantly different (P < 0.05)?	Yes
-18.5642	344.164		One- or two-tailed P value?	Two-tailed
1.8164	44.1216		Sum of positive, negative ranks	28 , 0
-4.4901	374.016		Sum of signed ranks (W)	28
			Number of pairs	7

## Sheet: 4B
auc
baseline	ATP		Wilcoxon matched-pairs signed rank test
71.8214	454.012		P value	0.008
8.4698	630.739		Exact or approximate P value?	Exact
-29.8594	427.12		P value summary	**
-14.9023	701.677		Significantly different (P < 0.05)?	Yes
3.8932	493.599		One- or two-tailed P value?	Two-tailed
0.5304	160.562		Sum of positive, negative ranks	36 , 0
-4.3997	72.6621		Sum of signed ranks (W)	36
-3.913	70.5612		Number of pairs	8

## Sheet: 4C
auc
baseline	UDP-Glucose		Wilcoxon matched-pairs signed rank test
-2.5779	324.711		P value	<0.001
-12.0593	1456.7		Exact or approximate P value?	Exact
-11.2076	92.2675		P value summary	***
-6.6524	286.237		Significantly different (P < 0.05)?	Yes
-20.8842	314.812		One- or two-tailed P value?	Two-tailed
-11.5518	390.318		Sum of positive, negative ranks	66 , 0
-0.9909	407.816		Sum of signed ranks (W)	66
7.5578	1622.1		Number of pairs	11
34.8122	1133.7
12.1619	2319.5
9.68	289.229

## Sheet: 4D
Drug	Spot	animalname	ROIType	freq
baseline	1	mSJ8350R	Process	54			Soma			Process
Nimodipine	1	mSJ8350R	Process	38			Paired t test			Paired t test
baseline	1	mSJ8350R	Soma	14			P value	0.04		P value	0.88
Nimodipine	1	mSJ8350R	Soma	10			P value summary	*		P value summary	ns
baseline	2	mSJ8350R	Process	34			Significantly different (P < 0.05)?	Yes		Significantly different (P < 0.05)?	No
Nimodipine	2	mSJ8350R	Process	26			One- or two-tailed P value?	Two-tailed		One- or two-tailed P value?	Two-tailed
baseline	2	mSJ8350R	Soma	6			t, df	t=2.39 df=10		t, df	t=0.1495 df=10
Nimodipine	2	mSJ8350R	Soma	6			Number of pairs	11		Number of pairs	11
baseline	3	mSJ8350R	Process	42
Nimodipine	3	mSJ8350R	Process	50
baseline	3	mSJ8350R	Soma	12
Nimodipine	3	mSJ8350R	Soma	10
baseline	4	mSJ8350R	Process	50
Nimodipine	4	mSJ8350R	Process	40
baseline	4	mSJ8350R	Soma	10
Nimodipine	4	mSJ8350R	Soma	6
baseline	5	mSL8139LR	Process	28
Nimodipine	5	mSL8139LR	Process	42
baseline	5	mSL8139LR	Soma	8
Nimodipine	5	mSL8139LR	Soma	8
baseline	6	mSL8139LR	Process	30
Nimodipine	6	mSL8139LR	Process	44
baseline	6	mSL8139LR	Soma	10
Nimodipine	6	mSL8139LR	Soma	10
baseline	7	mSL8139LR	Process	42
Nimodipine	7	mSL8139LR	Process	36
baseline	7	mSL8139LR	Soma	6
Nimodipine	7	mSL8139LR	Soma	6
baseline	8	mSL8137L	Process	46
Nimodipine	8	mSL8137L	Process	30
baseline	8	mSL8137L	Soma	10
Nimodipine	8	mSL8137L	Soma	8
baseline	9	mSL8137L	Process	40
Nimodipine	9	mSL8137L	Process	50
baseline	9	mSL8137L	Soma	6
Nimodipine	9	mSL8137L	Soma	8
baseline	10	mSL8137L	Process	32
Nimodipine	10	mSL8137L	Process	46
baseline	10	mSL8137L	Soma	8
Nimodipine	10	mSL8137L	Soma	6
baseline	11	mSL8137L	Process	32
Nimodipine	11	mSL8137L	Process	34
baseline	11	mSL8137L	Soma	10
Nimodipine	11	mSL8137L	Soma	6

## Sheet: 4E
Drug	Spot	animalname	ROIType	freq
baseline	1	mSL1818LR	Process	48
SKF96365	1	mSL1818LR	Process	22		Soma			Process
baseline	1	mSL1818LR	Soma	6		Wilcoxon matched-pairs signed rank test			Wilcoxon matched-pairs signed rank test
SKF96365	1	mSL1818LR	Soma	4		P value	0.02		P value	0.02
baseline	2	mSL1818LR	Process	52		P value summary	*		P value summary	*
SKF96365	2	mSL1818LR	Process	30		Significantly different (P < 0.05)?	Yes		Significantly different (P < 0.05)?	Yes
baseline	2	mSL1818LR	Soma	8		One- or two-tailed P value?	Two-tailed		One- or two-tailed P value?	Two-tailed
SKF96365	2	mSL1818LR	Soma	2		Number of pairs	7		Number of pairs	7
baseline	3	mSL1818LR	Process	60
SKF96365	3	mSL1818LR	Process	38
baseline	3	mSL1818LR	Soma	10
SKF96365	3	mSL1818LR	Soma	0
baseline	4	mSL9664L	Process	54
SKF96365	4	mSL9664L	Process	14
baseline	4	mSL9664L	Soma	6
SKF96365	4	mSL9664L	Soma	4
baseline	5	mSL9664L	Process	50
SKF96365	5	mSL9664L	Process	40
baseline	5	mSL9664L	Soma	10
SKF96365	5	mSL9664L	Soma	2
baseline	6	mSL9664L	Process	62
SKF96365	6	mSL9664L	Process	30
baseline	6	mSL9664L	Soma	10
SKF96365	6	mSL9664L	Soma	2
baseline	7	mSL2107LR	Process	44
SKF96365	7	mSL2107LR	Process	8
baseline	7	mSL2107LR	Soma	10
SKF96365	7	mSL2107LR	Soma	4
baseline	endstim(U46619)
10.8048	3828
1.5028	6743
13.5283	6602
14.3274	4120
9.2155	6894
6.8745	9217
37.4399	9174
Wilcoxon matched-pairs signed rank test
P value	0.02
Exact or approximate P value?	Exact
P value summary	*
Significantly different (P < 0.05)?	Yes
One- or two-tailed P value?	Two-tailed
Sum of positive, negative ranks	28 , 0
Sum of signed ranks (W)	28
Number of pairs	7
