# Supplementary material for: Distinct signatures of calcium activity in brain mural cells
Source: eLife. 2021 Jul 6;10:e70591. doi: 10.7554/eLife.70591 (PMC8294852; doi:10.7554/eLife.70591)
Supplement: Figure 5—figure supplement 1—source data 1. [file elife-70591-fig5-figsupp1-data1.xlsx]

## Sheet: Figure 5 -supp.1
Condition	Spot	animalname	ROIType	freq				Soma
anesthetized	1	younger male	Process	38.6667				Models:
anesthetized	1	younger male	Soma	6				freq.null: freq ~ (1 | animalname) + (1 | Spot)
anesthetized	2	young_female	Process	54				freq.model2: freq ~ Condition + (1 | animalname) + (1 | Spot)
anesthetized	2	young_female	Soma	8.66667				Df AIC BIC logLik deviance Chisq Chi Df Pr(>Chisq)
anesthetized	3	younger male	Process	62.6667				freq.null 4 542.91 554.02 -267.45 534.91
anesthetized	3	younger male	Soma	6				freq.model2 5 544.81 558.71 -267.41 534.81 0.0935 1 0.7597
anesthetized	4	female young	Process	14.6667				Condition lsmean SE df lower.CL upper.CL
anesthetized	4	female young	Soma	6.66667				anesthetized 8.516067 0.2436172 107.75 8.033163 8.998972
anesthetized	5	female young	Process	30.6667				cap_cloz_out 8.358974 0.4520730 115.15 7.462863 9.255085
anesthetized	5	female young	Soma	6.66667				Degrees-of-freedom method: satterthwaite
anesthetized	6	female young	Process	76				Confidence level used: 0.95
anesthetized	6	female young	Soma	7.33333				contrast estimate SE df t.ratio p.value
anesthetized	7	female young	Process	40.6667				anesthetized - cap_cloz_out 0.1570931 0.5135361 113.77 0.306 0.7602
anesthetized	7	female young	Soma	14
anesthetized	8	female young	Process	38.6667				Process
anesthetized	8	female young	Soma	8.66667				Models:
anesthetized	9	female young	Process	24.6667				freq.null: freq ~ (1 | animalname) + (1 | Spot)
anesthetized	9	female young	Soma	10				freq.model2: freq ~ Condition + (1 | animalname) + (1 | Spot)
anesthetized	10	female young	Process	36.6667				Df AIC BIC logLik deviance Chisq Chi Df Pr(>Chisq)
anesthetized	10	female young	Soma	10				freq.null 4 1040.8 1052.0 -516.43 1032.8
anesthetized	11	female young	Process	28				freq.model2 5 1042.8 1056.7 -516.41 1032.8 0.0415 1 0.8386
anesthetized	11	female young	Soma	9.33333				Condition lsmean SE df lower.CL upper.CL
anesthetized	12	female young	Process	38				anesthetized 45.38701 2.237326 22.87 40.75731 50.01671
anesthetized	12	female young	Soma	10				cap_cloz_out 44.41217 4.011160 33.71 36.11188 52.71247
anesthetized	13	female young	Process	66.6667				Degrees-of-freedom method: satterthwaite
anesthetized	13	female young	Soma	12				Confidence level used: 0.95
anesthetized	14	female young	Process	56				contrast estimate SE df t.ratio p.value
anesthetized	14	female young	Soma	7.33333				anesthetized - cap_cloz_out 0.9748363 4.524326 41.55 0.215 0.8305
anesthetized	15	female young	Process	31.3333
anesthetized	15	female young	Soma	10
anesthetized	16	female young	Process	42
anesthetized	16	female young	Soma	4.66667
anesthetized	17	female young	Process	72
anesthetized	17	female young	Soma	10.6667
anesthetized	18	mN1246L	Process	61.3333
anesthetized	18	mN1246L	Soma	10
anesthetized	19	mN1246L	Process	44
anesthetized	19	mN1246L	Soma	9.33333
anesthetized	20	mN1246L	Process	78.6667
anesthetized	20	mN1246L	Soma	7.33333
anesthetized	21	mN1246L	Process	55.3333
anesthetized	21	mN1246L	Soma	10
anesthetized	22	mN1246L	Process	56
anesthetized	22	mN1246L	Soma	9.33333
anesthetized	23	mN1246L	Process	24.6667
anesthetized	23	mN1246L	Soma	8.66667
anesthetized	24	mN1246L	Process	42
anesthetized	24	mN1246L	Soma	8
anesthetized	25	mN1246L	Process	54.6667
anesthetized	25	mN1246L	Soma	10.6667
anesthetized	26	fN0690L	Process	82.6667
anesthetized	26	fN0690L	Soma	5.33333
anesthetized	27	fN0690L	Process	54.6667
anesthetized	27	fN0690L	Soma	6
anesthetized	28	mN1246L	Process	106
anesthetized	28	mN1246L	Soma	7.33333
anesthetized	29	mN1246L	Process	80
anesthetized	29	mN1246L	Soma	9.33333
anesthetized	30	mN1246L	Process	32.6667
anesthetized	30	mN1246L	Soma	11.3333
anesthetized	31	mN1246L	Process	66
anesthetized	31	mN1246L	Soma	8.66667
anesthetized	32	mN1246L	Process	93.3333
anesthetized	32	mN1246L	Soma	12
anesthetized	33	mN1246L	Process	63.3333
anesthetized	33	mN1246L	Soma	13.3333
anesthetized	34	mN1247R	Process	33.3333
anesthetized	34	mN1247R	Soma	8
anesthetized	35	mN1247R	Process	52
anesthetized	35	mN1247R	Soma	10
anesthetized	36	mN1247R	Process	48
anesthetized	36	mN1247R	Soma	8
anesthetized	37	mN1246L	Process	34.6667
anesthetized	37	mN1246L	Soma	6
anesthetized	38	mN1246L	Process	46
anesthetized	38	mN1246L	Soma	6
anesthetized	39	mN1246L	Process	17.3333
anesthetized	39	mN1246L	Soma	4.66667
anesthetized	40	mN1246L	Process	31.3333
anesthetized	40	mN1246L	Soma	10
anesthetized	41	mN1246L	Process	50.6667
anesthetized	41	mN1246L	Soma	6.66667
anesthetized	42	mS02091LL	Process	62.6667
anesthetized	42	mS02091LL	Soma	9.33333
anesthetized	43	mS02091LL	Process	63.3333
anesthetized	43	mS02091LL	Soma	10.6667
anesthetized	44	mS02090LR	Process	64.6667
anesthetized	44	mS02090LR	Soma	8
anesthetized	45	mS02090LR	Process	68.6667
anesthetized	45	mS02090LR	Soma	8.66667
anesthetized	46	mS02090LR	Process	53.3333
anesthetized	46	mS02090LR	Soma	6.66667
anesthetized	47	mS02090LR	Process	18.6667
anesthetized	47	mS02090LR	Soma	11.3333
anesthetized	48	fSO4193R	Process	48.6667
anesthetized	48	fSO4235LL	Process	51.3333
anesthetized	49	fSO4193R	Soma	8.66667
anesthetized	49	fSO4235LL	Soma	8.66667
anesthetized	50	fSO4193R	Process	42
anesthetized	50	fSO4235LL	Process	52
anesthetized	51	fSO4193R	Soma	6.66667
anesthetized	51	fSO4235LL	Soma	6
anesthetized	52	fSO4193R	Process	47.3333
anesthetized	52	fSO4235LL	Process	34
anesthetized	53	fSO4193R	Soma	6.66667
anesthetized	53	fSO4235LL	Soma	10
anesthetized	54	female 6LL	Process	21.3333
anesthetized	54	female 6LL	Soma	6
anesthetized	55	fSO9485LR	Process	44.6667
anesthetized	55	fSO9485LR	Soma	14
anesthetized	56	female 6LR	Process	30.6667
anesthetized	56	female 6LR	Soma	9.33333
anesthetized	57	fSO9485LR	Process	24
anesthetized	57	fSO9485LR	Soma	10
anesthetized	58	fSO8970L	Process	68
anesthetized	58	fSO8970L	Soma	8.66667
anesthetized	59	fSO9485LR	Process	32.6667
anesthetized	59	fSO9485LR	Soma	14
anesthetized	60	fSO9485LR	Process	35.3333
anesthetized	60	fSO9485LR	Soma	10
anesthetized	61	fSO9485LR	Process	96
anesthetized	61	fSO9485LR	Soma	11.3333
anesthetized	62	female 6LR	Process	51.3333
anesthetized	62	female 6LR	Soma	9.33333
anesthetized	63	female 6LR	Process	38
anesthetized	63	female 6LR	Soma	7.33333
anesthetized	64	fSO8970L	Process	38
anesthetized	64	fSO8970L	Soma	10.6667
anesthetized	65	fSO4235LL	Process	58.6667
anesthetized	65	fSO4235LL	Soma	8.66667
anesthetized	66	fSO4235LL	Process	36
anesthetized	66	fSO4235LL	Soma	6
anesthetized	67	fSO8970L	Process	48
anesthetized	67	fSO8970L	Soma	9.33333
anesthetized	68	fSO9485LR	Process	27.3333
anesthetized	68	fSO9485LR	Soma	6.66667
anesthetized	69	fSO9485LR	Process	80
anesthetized	69	fSO9485LR	Soma	6.66667
anesthetized	70	fSO9485LR	Process	56
anesthetized	70	fSO9485LR	Soma	10
anesthetized	71	fSM1956LR	Process	18.6667
anesthetized	71	fSM1956LR	Soma	8
anesthetized	72	fSM1955R	Process	25.3333
anesthetized	72	fSM1955R	Soma	10
anesthetized	73	fSL5614L	Process	50.6667
anesthetized	73	fSL5614L	Soma	5.33333
anesthetized	74	fSL5614L	Process	12
anesthetized	74	fSL5614L	Soma	7.33333
anesthetized	75	fSM1956LR	Process	35.3333
anesthetized	75	fSM1956LR	Soma	7.33333
anesthetized	76	fSL5884L	Process	37.3333
anesthetized	76	mSL5879R	Process	14
anesthetized	77	fSL5884L	Soma	11.3333
anesthetized	77	mSL5879R	Soma	8.66667
anesthetized	78	mSL5879R	Process	36.6667
anesthetized	78	mSL5879R	Soma	10.6667
anesthetized	79	mSL5880LR	Process	26.6667
anesthetized	79	mSL5880LR	Soma	6
anesthetized	80	fSM1956LR	Process	29.3333
anesthetized	80	fSM1956LR	Soma	6.66667
anesthetized	81	fSM1956LR	Process	50
anesthetized	81	fSM1956LR	Soma	12
anesthetized	82	fSM1955R	Process	39.3333
anesthetized	82	fSM1956LR	Process	18.6667
anesthetized	83	fSM1955R	Soma	6.66667
anesthetized	83	fSM1956LR	Soma	8
anesthetized	84	mSL5879R	Process	32
anesthetized	84	mSL5879R	Soma	8.66667
anesthetized	85	mSL5879R	Process	22
anesthetized	85	mSL5879R	Soma	8
anesthetized	86	fSL5884L	Process	40.6667
anesthetized	86	fSL5884L	Soma	7.33333
anesthetized	87	fSL5884L	Process	40
anesthetized	87	fSL5884L	Soma	7.33333
anesthetized	88	fSL5884L	Process	22.6667
anesthetized	88	fSL5884L	Soma	2
anesthetized	89	fSP6953LR	Process	50.6667
anesthetized	89	fSP6953LR	Soma	5.33333
anesthetized	90	fSL7168LR	Process	34.6667
anesthetized	90	fSL7168LR	Soma	8
anesthetized	91	mSP8227L	Process	34
anesthetized	91	mSP8227L	Soma	8
anesthetized	92	fSL9054R	Process	63.3333
anesthetized	92	fSL9054R	Soma	10
anesthetized	93	fSP8231L	Process	61.3333
anesthetized	93	fSP8231L	Soma	4.66667
cap_cloz_out	1	fSL5614L	Process	62
cap_cloz_out	1	fSL5614L	Soma	10.6667
cap_cloz_out	2	fSL5884L	Process	70.6667
cap_cloz_out	2	fSL5884L	Soma	6
cap_cloz_out	3	fSL5884L	Process	37.3333
cap_cloz_out	3	fSL5884L	Soma	8
cap_cloz_out	4	mSL5880LR	Process	34
cap_cloz_out	4	mSL5880LR	Soma	8
cap_cloz_out	5	mSL5880LR	Process	30.6667
cap_cloz_out	5	mSL5880LR	Soma	13.3333
cap_cloz_out	6	fSM1955R	Process	32.6667
cap_cloz_out	6	fSM1955R	Soma	6
cap_cloz_out	7	fSM1956LR	Process	26.6667
cap_cloz_out	7	fSM1956LR	Soma	10
cap_cloz_out	8	mSL5880LR	Process	39.3333
cap_cloz_out	8	mSL5880LR	Soma	5.33333
cap_cloz_out	9	mSL5879R	Process	62
cap_cloz_out	9	mSL5879R	Soma	7.33333
cap_cloz_out	10	fSL5884L	Process	34
cap_cloz_out	10	fSL5884L	Soma	10.6667
cap_cloz_out	11	fSL5884L	Process	26.6667
cap_cloz_out	11	fSL5884L	Soma	10
cap_cloz_out	12	fSL5884L	Process	32
cap_cloz_out	12	fSL5884L	Soma	6.66667
cap_cloz_out	13	fSL5884L	Process	30.6667
cap_cloz_out	13	fSL5884L	Soma	9.33333
cap_cloz_out	14	mSL7420L	Process	69.3333
cap_cloz_out	14	mSL7420L	Soma	13.3333
cap_cloz_out	15	mSL7420L	Process	76
cap_cloz_out	15	mSL7420L	Soma	8
cap_cloz_out	16	fSP8236LR	Process	20.6667
cap_cloz_out	16	fSP8236LR	Soma	8
cap_cloz_out	17	mSL2105L	Process	70
cap_cloz_out	17	mSL2105L	Soma	4
cap_cloz_out	18	mSL2105L	Process	39.3333
cap_cloz_out	18	mSL2105L	Soma	5.33333
cap_cloz_out	19	mSL2105L	Process	41.3333
cap_cloz_out	19	mSL2105L	Soma	9.33333
cap_cloz_out	20	mSL2105L	Process	48
cap_cloz_out	20	mSL2105L	Soma	6.66667
cap_cloz_out	21	mSL2105L	Soma	12
cap_cloz_out	21	mSL2105L	Process	19.3333
cap_cloz_out	22	mSL2105L	Soma	11.3333
cap_cloz_out	22	mSL2105L	Process	35.3333
cap_cloz_out	23	mSL2105L	Soma	8.66667
cap_cloz_out	23	mSL2105L	Process	32.6667
cap_cloz_out	24	mSL2105L	Process	64
cap_cloz_out	24	mSL2105L	Soma	8
cap_cloz_out	25	mSL2105L	Process	66
cap_cloz_out	25	mSL2105L	Soma	4.66667
cap_cloz_out	26	mSL2105L	Process	36.6667
cap_cloz_out	26	mSL2105L	Soma	6.66667
