# Supplementary material for: Distinct signatures of calcium activity in brain mural cells
Source: eLife. 2021 Jul 6;10:e70591. doi: 10.7554/eLife.70591 (PMC8294852; doi:10.7554/eLife.70591)
Supplement: Figure 5—source data 1. [file elife-70591-fig5-data1.xlsx]

## Sheet: 5C
	baseline_Soma	clozapine_Soma
	6	0				Soma			Process
	4	0.6
	4.6	0				Wilcoxon matched-pairs signed rank test			Paired t test
	4	2				P value	<0.001		P value	<0.001
	6.6	1.3				Exact or approximate P value?	Exact		P value summary	***
	5.3	1.3				P value summary	***		Significantly different (P < 0.05)?	Yes
	6	0				Significantly different (P < 0.05)?	Yes		One- or two-tailed P value?	Two-tailed
	8.6	0.6				One- or two-tailed P value?	Two-tailed		t, df	t=8.815 df=15
	7.3	0				Sum of positive, negative ranks	0 , -136		Number of pairs	16
	6	0				Sum of signed ranks (W)	-136		Mean of differences	-41.25
	6	0				Number of pairs	16		SD of differences	18.72
	8	0				Median of differences			SEM of differences	4.679
	8	0				Median	-6		95% confidence interval	-51.22 to -31.28
	8	0				97.87% confidence interval	-8 to -4.667		R squared (partial eta squared)	0.8382
	8	0
	14	0
Number of values	16	16
25% Percentile	5.5	0
Median	6.333	0
75% Percentile	8	0.6667
Mean	6.917	0.375
Std. Deviation	2.396	0.6426
Std. Error of Mean	0.599	0.1607
Lower 95% CI	5.64	0.03257
Upper 95% CI	8.193	0.7174
	baseline_Process	clozapine_Process
	27.3	2
	44	8
	36.6	9.3
	53.3	4
	37.3	4
	45.3	2
	42.6	2
	70.6	0
	33.3	0
	76.6	0
	32	0
	46	0
	14	0
	78	4
	42	2
	18	0
Number of values	16	16
25% Percentile	32.33	0
Median	42.33	2
75% Percentile	51.5	4
Mean	43.58	2.333
Std. Deviation	18.69	2.921
Std. Error of Mean	4.673	0.7303
Lower 95% CI	33.62	0.7767
Upper 95% CI	53.54	3.89

## Sheet: 5D
	diam_baseline(um)	diam_clozapine(um)			Paired t test
	4.743	5.4913			P value	0.005
	3.162	3.88			P value summary	**
	3.593	4.216			Significantly different (P < 0.05)?	Yes
	3.759	3.638			One- or two-tailed P value?	Two-tailed
	5.3288	4.7365			t, df	t=3.245 df=15
	4.3657	4.4673			Number of pairs	16
	3.858	3.7047			Mean of differences	0.3664
	3.1044	3.8263			SD of differences	0.4516
	3.4148	3.8805			SEM of differences	0.1129
	3.0233	3.702			95% confidence interval	0.1258 to 0.6071
	4.49365	4.9795			R squared (partial eta squared)	0.4125
	5.0098	5.781
	3.404	4.014
	4.456	5.244
	4.192	4.602
	5.377	4.984
Number of values	16	16
25% Percentile	3.407	3.84
Median	4.025	4.342
75% Percentile	4.681	4.983
Mean	4.08	4.447
Std. Deviation	0.7811	0.6935
Std. Error of Mean	0.1953	0.1734
Lower 95% CI	3.664	4.077
Upper 95% CI	4.497	4.816

## Sheet: 5E
	baseline_Soma	clozapine_Soma				Paired t test
	8.66667	0				P value	<0.001
	8	0				P value summary	***
	12	0				Significantly different (P < 0.05)?	Yes
	4.66667	0				One- or two-tailed P value?	Two-tailed
	5.33333	0				t, df	t=10.71 df=10
	7.33333	0				Number of pairs	11
	5.33333	0				Mean of differences	-6.97
	5.33333	0				SD of differences	2.157
	5.33333	0				SEM of differences	0.6505
	7.33333	0.666667				95% confidence interval	-8.419 to -5.52
	8	0				R squared (partial eta squared)	0.9199
Number of values	11	11
25% Percentile	5.333	0
Median	7.333	0
75% Percentile	8	0
Mean	7.03	0.06061
Std. Deviation	2.157	0.201
Std. Error of Mean	0.6505	0.06061
Lower 95% CI	5.581	-0.07443
Upper 95% CI	8.48	0.1956
	baseline_Process	clozapine_Process				Wilcoxon matched-pairs signed rank test
	20	0				P value	<0.001
	18.6667	0				Exact or approximate P value?	Exact
	15.3333	0				P value summary	***
	6	1.33333				Significantly different (P < 0.05)?	Yes
	15.3333	1.33333				One- or two-tailed P value?	Two-tailed
	22.6667	0				Sum of positive, negative ranks	0 , -66
	23.3333	0				Sum of signed ranks (W)	-66
	25.3333	1.33333				Number of pairs	11
	23.3333	0				Median of differences
	24.6667	1.33333				Median	-22.67
	23.3333	0				98.83% confidence interval	-23.33 to -14
Number of values	11	11
25% Percentile	15.33	0
Median	22.67	0
75% Percentile	23.33	1.333
Mean	19.82	0.4848
Std. Deviation	5.759	0.6727
Std. Error of Mean	1.736	0.2028
Lower 95% CI	15.95	0.03292
Upper 95% CI	23.69	0.9368

## Sheet: 5F
	diam_baseline(um)	diam_clozapine(um)				Paired t test
	6.1705	7.1469				P value	<0.001
	5.5029	6.3233				P value summary	***
	4.56615	5.731				Significantly different (P < 0.05)?	Yes
	5.863	9.125				One- or two-tailed P value?	Two-tailed
	5.7411	6.5527				t, df	t=5.375 df=10
	4.514	5.337				Number of pairs	11
	5.0789	6.4239				Mean of differences	1.612
	5.541	7.222				SD of differences	0.995
	7.3807	10.375				SEM of differences	0.3
	8.2147	11.261
	6.2755	7.0879
Number of values	11	11
25% Percentile	5.079	6.323
Median	5.741	7.088
75% Percentile	6.276	9.125
Mean	5.895	7.508
Std. Deviation	1.116	1.915
Std. Error of Mean	0.3364	0.5774
Lower 95% CI	5.146	6.221
Upper 95% CI	6.645	8.794

## Sheet: 5G
	baseline_SMC	clozapine_SMC			Paired t test
	8	0.666667			P value	<0.001
	6.66667	0.666667			P value summary	***
	5.33333	0			Significantly different (P < 0.05)?	Yes
	6.66667	0			One- or two-tailed P value?	Two-tailed
	6	0.666667			t, df	t=16.55 df=12
	7.33333	0			Number of pairs	13
	6.66667	0.666667			Mean of differences	-6.051
	8	0			SD of differences	1.318
	6.66667	0			SEM of differences	0.3656
	6	0			95% confidence interval	-6.848 to -5.255
	6.66667	0			R squared (partial eta squared)	0.958
	4	0
	3.33333	0
Number of values	13	13
25% Percentile	5.667	0
Median	6.667	0
75% Percentile	7	0.6667
Mean	6.256	0.2051
Std. Deviation	1.375	0.3203
Std. Error of Mean	0.3815	0.08882
Lower 95% CI	5.425	0.0116
Upper 95% CI	7.088	0.3987

## Sheet: 5H
	diam_baseline	diam_clozapine			Paired t test
	24.44	29.67			P value	<0.001
	26.207	31.415			P value summary	***
	7.557	8.949			Significantly different (P < 0.05)?	Yes
	5.39	6.093			One- or two-tailed P value?	Two-tailed
	9.504	11.974			t, df	t=6.985 df=12
	13.072	18.147			Number of pairs	13
	9.691	11.865			Mean of differences	3.504
	8.823	10.735			SD of differences	1.809
	16.65	22.08			SEM of differences	0.5017
	18.52	24.194			95% confidence interval	2.411 to 4.597
	18.29	23.489			R squared (partial eta squared)	0.8026
	20.61	22.938
	12.497	15.256
Number of values	13	13
25% Percentile	9.164	11.3
Median	13.07	18.15
75% Percentile	19.57	23.84
Mean	14.71	18.22
Std. Deviation	6.616	8.078
Std. Error of Mean	1.835	2.24
Lower 95% CI	10.71	13.33
Upper 95% CI	18.71	23.1
