# Supplementary material for: Distinct signatures of calcium activity in brain mural cells
Source: eLife. 2021 Jul 6;10:e70591. doi: 10.7554/eLife.70591 (PMC8294852; doi:10.7554/eLife.70591)
Supplement: Figure 6—figure supplement 1—source data 1. [file elife-70591-fig6-figsupp1-data1.xlsx]

## Sheet: Tabelle1
Cell No	Cm=q/DV (pF)	Rin (MΩ)	Vr (mV)	AP threshold (mV)	AP amplitude (mV)	AP duration (ms)	AP number	AP number with TTx	Na current @peak (pA)	Na current with TTx (pA)
1	55.1	291.3	-76	-42.82	69.64	1.4	5	0	4674.92	0
2	74.6	136.9	-72	-38.91	79.15	1.2	6	0	9341.69	0
3	40.2	221.7	-77	-35	55.01	2	1	0	4248.17	0
4	93.3	73.3	-51	-32.5	54.58	1.8	1	0	8003	0
5	61.3	100.8	-55	-35.86	55.87	1.5	5	0	5993.91	0
6	113.7	316.3	-74	-44.13	73.43	2.2	4	0	3330.87	0
7	47.9	169.7	-58	-21.51	55.55	1.3	1	0	4421.34	0
