# Supplementary material for: Distinct signatures of calcium activity in brain mural cells
Source: eLife. 2021 Jul 6;10:e70591. doi: 10.7554/eLife.70591 (PMC8294852; doi:10.7554/eLife.70591)
Supplement: Figure 6—figure supplement 2—source data 1. [file elife-70591-fig6-figsupp2-data1.xlsx]

## Sheet: Figure 6-supp2
Drug	Spot	animalname	ROIType	freq
baseline	1	female	Process	48.6667			Soma			Process
TTX	1	female	Process	44			Paired t test			Paired t test
baseline	1	female	Soma	15.3333			P value	0.2979		P value	0.6
TTX	1	female	Soma	12			P value summary	ns		P value summary	ns
baseline	2	fN9452L	Process	26			Significantly different (P < 0.05)?	No		Significantly different (P < 0.05)?	No
TTX	2	fN9452L	Process	52.6667			One- or two-tailed P value?	Two-tailed		One- or two-tailed P value?	Two-tailed
baseline	2	fN9452L	Soma	18.6667			t, df	t=1.113 df=8		t, df	t=0.5425 df=8
TTX	2	fN9452L	Soma	12.6667			Number of pairs	9		Number of pairs	9
baseline	3	mSL5619R	Process	44
TTX	3	mSL5619R	Process	71.3333
baseline	3	mSL5619R	Soma	5.33333
TTX	3	mSL5619R	Soma	7.33333
baseline	4	mSL5619R	Process	47.3333
TTX	4	mSL5619R	Process	50
baseline	4	mSL5619R	Soma	8.66667
TTX	4	mSL5619R	Soma	9.33333
baseline	5	mSL5895L	Process	29.3333
TTX	5	mSL5895L	Process	46
baseline	5	mSL5895L	Soma	11.3333
TTX	5	mSL5895L	Soma	9.33333
baseline	6	mSL5895L	Process	40.6667
TTX	6	mSL5895L	Process	32.6667
baseline	6	mSL5895L	Soma	11.3333
TTX	6	mSL5895L	Soma	8
baseline	7	mSL5895L	Process	85.3333
TTX	7	mSL5895L	Process	77.3333
baseline	7	mSL5895L	Soma	8.66667
TTX	7	mSL5895L	Soma	7.33333
baseline	8	mSL5895L	Process	34.6667
TTX	8	mSL5895L	Process	36.6667
baseline	8	mSL5895L	Soma	7.33333
TTX	8	mSL5895L	Soma	5.33333
baseline	9	mSL5896R	Process	62
TTX	9	mSL5896R	Process	36
baseline	9	mSL5896R	Soma	8
TTX	9	mSL5896R	Soma	12.6667
