# Supplementary material for: Distinct signatures of calcium activity in brain mural cells
Source: eLife. 2021 Jul 6;10:e70591. doi: 10.7554/eLife.70591 (PMC8294852; doi:10.7554/eLife.70591)
Supplement: Figure 6—figure supplement 3—source data 1. [file elife-70591-fig6-figsupp3-data1.xlsx]

## Sheet: Figure 6- supp.3
	diameter at soma (um)
	baseline cap	hypoxia cap	recovery cap
	3.539	4.275	4.065
	4.015	4.76	3.85
	3.9	4.22	3.67		2way ANOVA
	4.78	5.035	4.52		Tukey's multiple comparisons test	Mean Diff.	95.00% CI of diff.	Significant?	Summary	Adjusted P Value
	4.03	4.72	4.05
	4.22	5.28	4.63		hypoxia cap vs. baseline cap	0.505	0.3046 to 0.7054	Yes	***	<0.001
	3.34	4.04	3.78		recovery cap vs. baseline cap	0.1535	-0.04693 to 0.3539	No	ns	0.16
	3.82	4.24	3.97		recovery cap vs. hypoxia cap	-0.3515	-0.5519 to -0.1511	Yes	***	<0.001
	3.4	4.18	3.56
	4.24	4.304	4.6
	4.19734	4.81247	4.42836		Test details	Mean 1	Mean 2	Mean Diff.	SE of diff.	N1	N2	q	DF
	4.55828	4.57682	4.63765
	4.87789	5.24236	5.35081		hypoxia cap vs. baseline cap	4.459	3.954	0.505	0.0813	16	16	8.784	30
	3.48393	4.15364	4.16815		recovery cap vs. baseline cap	4.108	3.954	0.1535	0.0813	16	16	2.67	30
	3.40124	3.91761	3.0089		recovery cap vs. hypoxia cap	4.108	4.459	-0.3515	0.0813	16	16	6.114	30
	3.46225	3.58773	3.43195
Number of values	16	16	16
25% Percentile	3.468	4.16	3.698
Median	3.958	4.29	4.058
75% Percentile	4.235	4.799	4.58
Mean	3.954	4.459	4.108
Std. Deviation	0.5012	0.4816	0.5757
Std. Error of Mean	0.1253	0.1204	0.1439
	diameter at distal capillary (um)
	baseline	hypoxia	recovery
	3.37787	3.65254	3.63
	4.62573	5.13434	4.4096
	4.29456	4.39489	4.33412		2way ANOVA
	3.43316	3.63865	3.5989		Tukey's multiple comparisons test	Mean Diff.	95.00% CI of diff.	Significant?	Summary	Adjusted P Value
	3.21135	3.67773	3.27698
	5.06183	6.00889	6.22913		hypoxia vs. baseline	0.5256	0.3255 to 0.7257	Yes	***	<0.001
	3.08882	4.17976	3.47965		recovery vs. baseline	0.2447	0.04458 to 0.4448	Yes	*	0.01
	2.64338	3.56449	2.65254		recovery vs. hypoxia	-0.281	-0.4811 to -0.08086	Yes	**	0.005
	2.99644	3.55014	3.26937
	3.90712	4.25168	4.33396
	4.13889	4.38955	4.15423		Test details	Mean 1	Mean 2	Mean Diff.	SE of diff.	N1	N2	q	DF
	3.73115	4.33848	4.00647
	4.26024	5.11313	5.0705		hypoxia vs. baseline	4.281	3.755	0.5256	0.08117	16	16	9.158	30
	3.2199	3.98332	3.65713		recovery vs. baseline	4	3.755	0.2447	0.08117	16	16	4.263	30
	3.6807	3.93837	3.56006		recovery vs. hypoxia	4	4.281	-0.281	0.08117	16	16	4.895	30
	4.41237	4.67762	4.33565
Number of values	16	16	16
25% Percentile	3.213	3.659	3.5
Median	3.706	4.216	3.832
75% Percentile	4.286	4.607	4.335
Mean	3.755	4.281	4
Std. Deviation	0.6685	0.6845	0.8324
Std. Error of Mean	0.1671	0.1711	0.2081
