# Supplementary material for: Distinct signatures of calcium activity in brain mural cells
Source: eLife. 2021 Jul 6;10:e70591. doi: 10.7554/eLife.70591 (PMC8294852; doi:10.7554/eLife.70591)
Supplement: Figure 6—source data 1. [file elife-70591-fig6-data1.xlsx]

## Sheet: 6A
Drug	Spot	animalname	ROIType	freq
10mM_KCl	1	fSO5788L	Process	2
baseline	1	fSO5788L	Process	38		Soma			Process
10mM_KCl	1	fSO5788L	Soma	0		Wilcoxon matched-pairs signed rank test			Paired t test
baseline	1	fSO5788L	Soma	10		P value	<0.001		P value	<0.001
10mM_KCl	2	fSO5788L	Process	2		Exact or approximate P value?	Exact		P value summary	***
baseline	2	fSO5788L	Process	32		P value summary	***		Significantly different (P < 0.05)?	Yes
10mM_KCl	2	fSO5788L	Soma	0		Significantly different (P < 0.05)?	Yes		One- or two-tailed P value?	Two-tailed
baseline	2	fSO5788L	Soma	12		One- or two-tailed P value?	Two-tailed		t, df	t=8.516 df=12
10mM_KCl	3	fSO5788L	Process	6		Sum of positive, negative ranks	0 , -91		Number of pairs	13
baseline	3	fSO5788L	Process	40		Sum of signed ranks (W)	-91
10mM_KCl	3	fSO5788L	Soma	0		Number of pairs	13
baseline	3	fSO5788L	Soma	12
10mM_KCl	4	fSO5788L	Process	8
baseline	4	fSO5788L	Process	54
10mM_KCl	4	fSO5788L	Soma	0
baseline	4	fSO5788L	Soma	8
10mM_KCl	5	fSO5788L	Process	10
baseline	5	fSO5788L	Process	60
10mM_KCl	5	fSO5788L	Soma	0
baseline	5	fSO5788L	Soma	12
10mM_KCl	6	fSO5788L	Process	2
baseline	6	fSO5788L	Process	52
10mM_KCl	6	fSO5788L	Soma	0
baseline	6	fSO5788L	Soma	8
10mM_KCl	7	fSO5788L	Process	10
baseline	7	fSO5788L	Process	26
10mM_KCl	7	fSO5788L	Soma	0
baseline	7	fSO5788L	Soma	12
10mM_KCl	8	fSO5788L	Process	6
baseline	8	fSO5788L	Process	80
10mM_KCl	8	fSO5788L	Soma	0
baseline	8	fSO5788L	Soma	8
10mM_KCl	9	mSL8409LL	Process	0
baseline	9	mSL8409LL	Process	48
10mM_KCl	9	mSL8409LL	Soma	0
baseline	9	mSL8409LL	Soma	8
10mM_KCl	10	fSL8414LR	Process	4
baseline	10	fSL8414LR	Process	16
10mM_KCl	10	fSL8414LR	Soma	0
baseline	10	fSL8414LR	Soma	8
10mM_KCl	11	mSL9195L	Process	0
baseline	11	mSL9195L	Process	60
10mM_KCl	11	mSL9195L	Soma	0
baseline	11	mSL9195L	Soma	8
10mM_KCl	12	mSL9195L	Process	2
baseline	12	mSL9195L	Process	70
10mM_KCl	12	mSL9195L	Soma	0
baseline	12	mSL9195L	Soma	6
10mM_KCl	13	mSL9195L	Process	4
baseline	13	mSL9195L	Process	42
10mM_KCl	13	mSL9195L	Soma	0
baseline	13	mSL9195L	Soma	10

## Sheet: 6B
Drug	Spot	animalname	ROIType	freq
BaCl2_KCl	1	mSP6965R	Process	10
BaCl2_KCl	1	mSP6965R	Soma	0
BaCl2_KCl	2	mSP6965R	Process	38			Soma
BaCl2_KCl	2	mSP6965R	Soma	8			Tukey's multiple comparisons test	Mean Diff.	95.00% CI of diff.	Significant?	Summary	Adjusted P Value		F	5.728
BaCl2_KCl	3	mSP6957L	Process	12										P value	0.02
BaCl2_KCl	3	mSP6957L	Soma	4			BaCl2_soma vs. baseline Soma	0.8	-2.869 to 4.469	No	ns	0.82		P value summary	*
BaCl2_KCl	4	mSP6957L	Process	50			BaCl2 -KCl Soma vs. baseline Soma	-3.067	-6.676 to 0.5426	No	ns	0.1		Statistically significant (P < 0.05)?	Yes
BaCl2_KCl	4	mSP6957L	Soma	6			BaCl2 -KCl Soma vs. BaCl2_soma	-3.867	-6.611 to -1.123	Yes	**	0.009		Geisser-Greenhouse's epsilon	0.8982
BaCl2_KCl	5	mSP6957L	Process	42										R square	0.3889
BaCl2_KCl	5	mSP6957L	Soma	8										F (DFn, DFd)	P value
BaCl2_KCl	6	fSP7903LR	Process	108										F (1.796, 16.17) = 5.728	P=0.02
BaCl2_KCl	6	fSP7903LR	Soma	6
BaCl2_KCl	7	fSP7903LR	Process	94			Process
BaCl2_KCl	7	fSP7903LR	Soma	6			Tukey's multiple comparisons test	Mean Diff.	95.00% CI of diff.	Significant?	Summary	Adjusted P Value		F	7.137
BaCl2_KCl	8	fSL7947R	Process	18										P value	0.01
BaCl2_KCl	8	fSL7947R	Soma	2			BaCl2 process vs. baseline Process	8.333	-6.646 to 23.31	No	ns	0.31		P value summary	*
BaCl2_KCl	9	fSL7947R	Process	28			BaCl2 KCl_process vs. baseline Process	-11.93	-30.23 to 6.362	No	ns	0.22		Statistically significant (P < 0.05)?	Yes
BaCl2_KCl	9	fSL7947R	Soma	4			BaCl2 KCl_process vs. BaCl2 process	-20.27	-31.26 to -9.272	Yes	**	0.002		Geisser-Greenhouse's epsilon	0.7712
BaCl2_KCl	10	fSL7947R	Process	32										R square	0.4423
BaCl2_KCl	10	fSL7947R	Soma	2										F (DFn, DFd)	P value
BaCl2	1	mSP6965R	Process	29.33										F (1.542, 13.88) = 7.137	P=0.01
BaCl2	1	mSP6965R	Soma	3.33
BaCl2	2	mSP6965R	Process	60
BaCl2	2	mSP6965R	Soma	12.66
BaCl2	3	mSP6957L	Process	23.33
BaCl2	3	mSP6957L	Soma	14
BaCl2	4	mSP6957L	Process	74
BaCl2	4	mSP6957L	Soma	12.66
BaCl2	5	mSP6957L	Process	51.33
BaCl2	5	mSP6957L	Soma	10.66
BaCl2	6	fSP7903LR	Process	107.33
BaCl2	6	fSP7903LR	Soma	7.33
BaCl2	7	fSP7903LR	Process	125.33
BaCl2	7	fSP7903LR	Soma	4.66
BaCl2	8	fSL7947R	Process	30.66
BaCl2	8	fSL7947R	Soma	7.33
BaCl2	9	fSL7947R	Process	68
BaCl2	9	fSL7947R	Soma	6
BaCl2	10	fSL7947R	Process	65.33
BaCl2	10	fSL7947R	Soma	6
baseline	1	mSP6965R	Process	36.66
baseline	1	mSP6965R	Soma	10.66
baseline	2	mSP6965R	Process	44.66
baseline	2	mSP6965R	Soma	8.66
baseline	3	mSP6957L	Process	24
baseline	3	mSP6957L	Soma	12
baseline	4	mSP6957L	Process	62.66
baseline	4	mSP6957L	Soma	5.33
baseline	5	mSP6957L	Process	23.33
baseline	5	mSP6957L	Soma	7.33
baseline	6	fSP7903LR	Process	106
baseline	6	fSP7903LR	Soma	6.66
baseline	7	fSP7903LR	Process	80.66
baseline	7	fSP7903LR	Soma	5.33
baseline	8	fSL7947R	Process	28.66
baseline	8	fSL7947R	Soma	4
baseline	9	fSL7947R	Process	70.66
baseline	9	fSL7947R	Soma	8
baseline	10	fSL7947R	Process	74
baseline	10	fSL7947R	Soma	8.66

## Sheet: 6C
Drug	Spot	animalname	ROIType	freq
PNU_BaCl2	1	mSP6957L	Process	32
PNU_BaCl2	1	mSP6957L	Soma	10
PNU_BaCl2	2	mSP6957L	Process	48		Soma
PNU_BaCl2	2	mSP6957L	Soma	10		Tukey's multiple comparisons test	Mean Diff.	95.00% CI of diff.	Significant?	Summary	Adjusted P Value		F	0.2248
PNU_BaCl2	3	fSL7903LR	Process	58									P value	0.72
PNU_BaCl2	3	fSL7903LR	Soma	8		PNU_BaCl2 KCl_soma vs. baseline Soma	0.7778	-2.153 to 3.708	No	ns	0.76		P value summary	ns
PNU_BaCl2	4	fSL7903LR	Process	36		PNU_BaCl2 -KCl Soma vs. baseline Soma	-0.05556	-4.883 to 4.772	No	ns	>0.99		Statistically significant (P < 0.05)?	No
PNU_BaCl2	4	fSL7903LR	Soma	8		PNU_BaCl2 -KCl Soma vs. PNU_BaCl2 KCl_soma	-0.8333	-4.054 to 2.387	No	ns	0.77		Geisser-Greenhouse's epsilon	0.6976
PNU_BaCl2	5	fSL7903LR	Process	70									R square	0.02003
PNU_BaCl2	5	fSL7903LR	Soma	14									F (DFn, DFd)	P value
PNU_BaCl2	6	fSL7903LR	Process	48									F (1.395, 15.35) = 0.2248	P=0.72
PNU_BaCl2	6	fSL7903LR	Soma	8
PNU_BaCl2	7	fSL7903LR	Process	62		Process
PNU_BaCl2	7	fSL7903LR	Soma	18		Tukey's multiple comparisons test	Mean Diff.	95.00% CI of diff.	Significant?	Summary	Adjusted P Value		F	0.9687
PNU_BaCl2	8	fSL7903LR	Process	106									P value	0.38
PNU_BaCl2	8	fSL7903LR	Soma	10		PNU_BaCl2 process vs. baseline Process	1.5	-14.06 to 17.06	No	ns	0.96		P value summary	ns
PNU_BaCl2	9	fSL7947R	Process	20.66		PNU_BaCl2 KCl_process vs. baseline Process	8.111	-11.88 to 28.1	No	ns	0.54		Statistically significant (P < 0.05)?	No
PNU_BaCl2	9	fSL7947R	Soma	4		PNU_BaCl2 KCl_process vs. PNU_BaCl2 process	6.611	-7.521 to 20.74	No	ns	0.44		Geisser-Greenhouse's epsilon	0.8415
PNU_BaCl2	10	fSL7947R	Process	21.33									R square	0.08094
PNU_BaCl2	10	fSL7947R	Soma	6									F (DFn, DFd)	P value
PNU_BaCl2	11	fSL7947R	Process	17.33									F (1.683, 18.51) = 0.9687	P=0.38
PNU_BaCl2	11	fSL7947R	Soma	4
PNU_BaCl2	12	fSL7947R	Process	60.66
PNU_BaCl2	12	fSL7947R	Soma	8
PNU_BaCl2_KCl	1	mSP6957L	Process	56
PNU_BaCl2_KCl	1	mSP6957L	Soma	4.66667
PNU_BaCl2_KCl	2	mSP6957L	Process	70
PNU_BaCl2_KCl	2	mSP6957L	Soma	8
PNU_BaCl2_KCl	3	fSL7903LR	Process	70
PNU_BaCl2_KCl	3	fSL7903LR	Soma	6
PNU_BaCl2_KCl	4	fSL7903LR	Process	24
PNU_BaCl2_KCl	4	fSL7903LR	Soma	7.33333
PNU_BaCl2_KCl	5	fSL7903LR	Process	72
PNU_BaCl2_KCl	5	fSL7903LR	Soma	12
PNU_BaCl2_KCl	6	fSL7903LR	Process	82
PNU_BaCl2_KCl	6	fSL7903LR	Soma	10
PNU_BaCl2_KCl	7	fSL7903LR	Process	76
PNU_BaCl2_KCl	7	fSL7903LR	Soma	17.3333
PNU_BaCl2_KCl	8	fSL7903LR	Process	132
PNU_BaCl2_KCl	8	fSL7903LR	Soma	8.66667
PNU_BaCl2_KCl	9	fSL7947R	Process	24
PNU_BaCl2_KCl	9	fSL7947R	Soma	14
PNU_BaCl2_KCl	10	fSL7947R	Process	6
PNU_BaCl2_KCl	10	fSL7947R	Soma	10
PNU_BaCl2_KCl	11	fSL7947R	Process	8
PNU_BaCl2_KCl	11	fSL7947R	Soma	7.33333
PNU_BaCl2_KCl	12	fSL7947R	Process	40
PNU_BaCl2_KCl	12	fSL7947R	Soma	12.6667
baseline	1	mSP6957L	Process	31.33
baseline	1	mSP6957L	Soma	6
baseline	2	mSP6957L	Process	54
baseline	2	mSP6957L	Soma	9.33
baseline	3	fSL7903LR	Process	38
baseline	3	fSL7903LR	Soma	7.33
baseline	4	fSL7903LR	Process	18
baseline	4	fSL7903LR	Soma	8
baseline	5	fSL7903LR	Process	34
baseline	5	fSL7903LR	Soma	8
baseline	6	fSL7903LR	Process	26
baseline	6	fSL7903LR	Soma	6.66
baseline	7	fSL7903LR	Process	84.66
baseline	7	fSL7903LR	Soma	8.66
baseline	8	fSL7903LR	Process	126
baseline	8	fSL7903LR	Soma	6.66
baseline	9	fSL7947R	Process	49.33
baseline	9	fSL7947R	Soma	18
baseline	10	fSL7947R	Process	25.33
baseline	10	fSL7947R	Soma	11.33
baseline	11	fSL7947R	Process	22
baseline	11	fSL7947R	Soma	10.66
baseline	12	fSL7947R	Process	54
baseline	12	fSL7947R	Soma	12.66

## Sheet: 6D
Drug	Spot	animalname	ROIType	freq
baseline	1	mSO3655RR	Process	30			Soma			Process
NaN3	1	mSO3655RR	Process	0			Paired t test			Paired t test
baseline	1	mSO3655RR	Soma	18			P value	0.003		P value	<0.001
NaN3	1	mSO3655RR	Soma	0			P value summary	**		P value summary	***
baseline	2	mSO3655RR	Process	32			Significantly different (P < 0.05)?	Yes		Significantly different (P < 0.05)?	Yes
NaN3	2	mSO3655RR	Process	8			One- or two-tailed P value?	Two-tailed		One- or two-tailed P value?	Two-tailed
baseline	2	mSO3655RR	Soma	8			t, df	t=4.824 df=6		t, df	t=7.621 df=6
NaN3	2	mSO3655RR	Soma	0			Number of pairs	7		Number of pairs	7
baseline	3	mSO3655RR	Process	42
NaN3	3	mSO3655RR	Process	14
baseline	3	mSO3655RR	Soma	12
NaN3	3	mSO3655RR	Soma	0
baseline	4	mSO3655RR	Process	50
NaN3	4	mSO3655RR	Process	2
baseline	4	mSO3655RR	Soma	8
NaN3	4	mSO3655RR	Soma	0
baseline	5	mSO3655RR	Process	24
NaN3	5	mSO3655RR	Process	4
baseline	5	mSO3655RR	Soma	4
NaN3	5	mSO3655RR	Soma	2
baseline	6	fSO3649R	Process	22
NaN3	6	fSO3649R	Process	0
baseline	6	fSO3649R	Soma	10
NaN3	6	fSO3649R	Soma	0
baseline	7	mSO3007R	Process	26
NaN3	7	mSO3007R	Process	4
baseline	7	mSO3007R	Soma	6
NaN3	7	mSO3007R	Soma	0

## Sheet: 6E
Drug	Spot	animalname	ROIType	freq
baseline	1	fSO4235LL	Process	44			Soma			Process
hypoxia	1	fSO4235LL	Process	12			Wilcoxon matched-pairs signed rank test			Wilcoxon matched-pairs signed rank test
baseline	1	fSO4235LL	Soma	8			P value	<0.001		P value	<0.001
hypoxia	1	fSO4235LL	Soma	0			Exact or approximate P value?	Exact		Exact or approximate P value?	Exact
baseline	2	f6LR	Process	48			P value summary	***		P value summary	***
hypoxia	2	f6LR	Process	0			Significantly different (P < 0.05)?	Yes		Significantly different (P < 0.05)?	Yes
baseline	2	f6LR	Soma	10			One- or two-tailed P value?	Two-tailed		One- or two-tailed P value?	Two-tailed
hypoxia	2	f6LR	Soma	0			Sum of positive, negative ranks	0 , -136		Sum of positive, negative ranks	0 , -136
baseline	3	f6LR	Process	44			Sum of signed ranks (W)	-136		Sum of signed ranks (W)	-136
hypoxia	3	f6LR	Process	0			Number of pairs	16		Number of pairs	16
baseline	3	f6LR	Soma	8
hypoxia	3	f6LR	Soma	0
baseline	4	f6LR	Process	42
hypoxia	4	f6LR	Process	0
baseline	4	f6LR	Soma	6
hypoxia	4	f6LR	Soma	0
baseline	5	f6LR	Process	40
hypoxia	5	f6LR	Process	2
baseline	5	f6LR	Soma	8
hypoxia	5	f6LR	Soma	0
baseline	6	f6LR	Process	50
hypoxia	6	f6LR	Process	0
baseline	6	f6LR	Soma	4
hypoxia	6	f6LR	Soma	0
baseline	7	f6LR	Process	18
hypoxia	7	f6LR	Process	2
baseline	7	f6LR	Soma	6
hypoxia	7	f6LR	Soma	0
baseline	8	f6LR	Process	34
hypoxia	8	f6LR	Process	4
baseline	8	f6LR	Soma	8
hypoxia	8	f6LR	Soma	0
baseline	9	f6LR	Process	42
hypoxia	9	f6LR	Process	4
baseline	9	f6LR	Soma	10
hypoxia	9	f6LR	Soma	0
baseline	10	f7L	Process	20
hypoxia	10	f7L	Process	6
baseline	10	f7L	Soma	8
hypoxia	10	f7L	Soma	0
baseline	11	f7L	Process	48
hypoxia	11	f7L	Process	6
baseline	11	f7L	Soma	8
hypoxia	11	f7L	Soma	0
baseline	12	f7L	Process	32
hypoxia	12	f7L	Process	0
baseline	12	f7L	Soma	10
hypoxia	12	f7L	Soma	0
baseline	13	f7L	Process	48
hypoxia	13	f7L	Process	0
baseline	13	f7L	Soma	8
hypoxia	13	f7L	Soma	0
baseline	14	f7L	Process	84
hypoxia	14	f7L	Process	2
baseline	14	f7L	Soma	6
hypoxia	14	f7L	Soma	0
baseline	15	f7L	Process	42
hypoxia	15	f7L	Process	6
baseline	15	f7L	Soma	8
hypoxia	15	f7L	Soma	2
baseline	16	f7L	Process	40
hypoxia	16	f7L	Process	4
baseline	16	f7L	Soma	16
hypoxia	16	f7L	Soma	0
